# Supplementary material for: Redox-neutral depolymerization of lignin-derived aryl ethers catalyzed by Rh(iii)-complexes: a mechanistic insight
Source: Royal Society of Chemistry journal article supplement (doi:10.1039/d4cp02660h), 2024-01-01
Supplement: d4cp02660h1.pdf [file d4cp02660h1.pdf]

## Supporting Information

### Redox-neutral Depolymerization of Lignin-Derived Aryl Ethers Catalyzed by Rh(III)-complexes: A Mechanistic Insight

Yan Zhang,<sup>a,b</sup> Yafei Luo,<sup>a,b</sup> Changwei Hu,<sup>a</sup> Dianyong Tang<sup>\*b</sup>, and Zhishan Su<sup>\*a</sup>

<sup>1</sup>Key Laboratory of Green Chemistry and Technology, Ministry of Education, College of Chemistry, Sichuan University, Chengdu, Sichuan, 610064, P.R. China

<sup>2</sup> College of Pharmacy & International Academy of Targeted Therapeutics and Innovation, Chongqing University of Arts and Sciences, Chongqing 402160, China.

#### Contents

|                                                                                                                                                                                                                                                                                                                                                                                                                                                                    |    |
|--------------------------------------------------------------------------------------------------------------------------------------------------------------------------------------------------------------------------------------------------------------------------------------------------------------------------------------------------------------------------------------------------------------------------------------------------------------------|----|
| <b>Table S1</b> Comparison of key geometric parameters obtained by experiments and theoretical calculations at the TPSSh-D3(BJ)/def2-SVP (SMD, water) theoretical level.....                                                                                                                                                                                                                                                                                       | S3 |
| <b>Table S2</b> Comparison of relative Gibbs free energy ( $\Delta G$ ) of [Rh]-OH species with different spin states.....                                                                                                                                                                                                                                                                                                                                         | S3 |
| <b>Figure S1</b> Results of energy decomposition analysis (EDA). Dominating contributions to the deformation density $\Delta\rho(1)$ associated with the interaction between Rh-complex and lignin moiety in the I-[Rh]-IM2, determined by the extended transition state-natural orbitals for chemical valence (ETS-NOCV) analysis. The contour value $ \Delta\rho =0.003$ au. The blue/red contours correspond to accumulation/depletion of electron density..... | S3 |
| <b>Figure S2</b> Optimized geometries of I-[Rh]-TS3 and I-[Rh]-TS3'.....                                                                                                                                                                                                                                                                                                                                                                                           | S4 |
| <b>Table S3</b> Selected parameters for $C_\beta$ -O, $C_\alpha$ - $C_\beta$ and O-Ar <sup>2</sup> bond in species 2, 1a and 1b.....                                                                                                                                                                                                                                                                                                                               | S4 |
| <b>Figure S3</b> Results of Localized orbital locator (LOL) calculation for I-[Rh]-IM4 and I-[2Rh]-IM4.....                                                                                                                                                                                                                                                                                                                                                        | S4 |
| <b>Figure S4</b> (a) The bond length and the corresponding Localized orbital locator (LOL) analysis for the stationary points on the potential energy surface along path I-[2Rh] and II-[2Rh]. (b) Distortion-interaction analysis for I-[2Rh]-TS1 and II-[2Rh]-TS1.....                                                                                                                                                                                           | S5 |
| <b>Figure S5</b> Electrostatic potential (ESP) analysis for [Rh]-H and [2Rh]-H species.....                                                                                                                                                                                                                                                                                                                                                                        | S5 |

|                                                                                                                                                                                                                                                                                                                            |     |
|----------------------------------------------------------------------------------------------------------------------------------------------------------------------------------------------------------------------------------------------------------------------------------------------------------------------------|-----|
| <b>Figure S6</b> Distortion-interaction analysis for I-[Rh]-TS3 and I-[Ir]-TS3. The energy is in kcal mol <sup>-1</sup> .....                                                                                                                                                                                              | S6  |
| <b>Figure S7</b> Activation barriers associated with the C <sub>β</sub> -O bond cleavage in ketone intermediate 2 catalyzed by RuH <sub>2</sub> (CO)PPh <sub>3</sub> .....                                                                                                                                                 | S6  |
| <b>Figure S8</b> Optimized geometries of [2Rh]-1a-TS and [2Rh]-1b-TS in the C-O bond cleavage catalyzed by [2Rh]-H species. Relative Gibbs free energy was in kcal mol <sup>-1</sup> .....                                                                                                                                 | S6  |
| <b>Figure S9</b> Energy profile for the formation of C=O group at the C <sub>α</sub> atom of 1c catalyzed by rhodium-terpyridine complex.....                                                                                                                                                                              | S7  |
| <b>Figure S10</b> Energy profiles for the elimination of hydroxyl group in 1c-IM3 along three pathways.....                                                                                                                                                                                                                | S7  |
| <b>Scheme S1</b> Depolymerization mechanism for the β-O-4 model compound with γ-OH functionality (1c), catalyzed by rhodium-terpyridine complex.....                                                                                                                                                                       | S8  |
| <b>Figure S11</b> Energy profiles associated with the depolymerization of β-O-4 model compounds with γ-OH functionality, catalyzed by rhodium-terpyridine complex along path C. ....                                                                                                                                       | S8  |
| <b>Table S4</b> Comparison of relative Gibbs free energy ( $\Delta G$ ) and activation barrier ( $\Delta G^\ddagger$ ) obtained by using different functionals.....                                                                                                                                                        | S8  |
| <b>Table S5</b> Comparison of relative Gibbs free energy ( $\Delta G$ ) for key species (I-[2Rh]-IM3 and I-[2Rh]-TS3) in binuclear Rh-complex system with or without counterion (Cl <sup>-</sup> ).....                                                                                                                    | S9  |
| <b>Table S6</b> Electronic energies ( $E_Z$ ), enthalpies ( $H$ ), and Gibbs free energies ( $G$ ) for all stationary points (in Hartree), obtained at the TPSSh-D3(BJ)/def2-SVP (SMD, water) theoretical level. Single-point energy calculations were run at the TPSSh-D3(BJ)/def2-TZVP (SMD, water) level of theory..... | S10 |
| <b>Cartesian coordinates of all stationary points</b> .....                                                                                                                                                                                                                                                                | S14 |

**Table S1** Comparison of key geometric parameters obtained by experiments and theoretical calculations at the TPSSh-D3(BJ)/def2-SVP (SMD, water) theoretical level.

| Rh complex                                                                                         | Parameters          | Exp.        | Calc.   | $ \Delta $ |       |
|----------------------------------------------------------------------------------------------------|---------------------|-------------|---------|------------|-------|
| 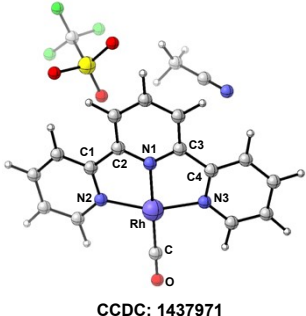<br>CCDC: 1437971 | <b>Bond (Å)</b>     | Rh-N1       | 1.981   | 1.994      | 0.013 |
|                                                                                                    |                     | Rh-N2       | 2.051   | 2.054      | 0.003 |
|                                                                                                    |                     | Rh-N3       | 2.051   | 2.052      | 0.001 |
|                                                                                                    |                     | Rh-C        | 1.839   | 1.857      | 0.018 |
|                                                                                                    |                     | C-O         | 1.166   | 1.156      | 0.010 |
|                                                                                                    | <b>Angle (°)</b>    | N1-Rh-N2    | 79.006  | 79.506     | 0.500 |
|                                                                                                    |                     | N1-Rh-N3    | 79.304  | 79.410     | 0.106 |
|                                                                                                    |                     | N2-Rh-N3    | 158.286 | 158.784    | 0.498 |
|                                                                                                    | <b>Dihedral (°)</b> | Rh-N2-C1-C2 | -0.920  | -5.445     | 4.525 |
|                                                                                                    |                     | Rh-N3-C4-C3 | -1.851  | 3.026      | 4.877 |

**Table S2** Comparison of relative Gibbs free energy ( $\Delta G$ ) of [Rh]-OH species with different spin states.

| [Rh]-OH species                                                                     | Spin state | $\Delta G(\text{kcal mol}^{-1})$ |
|-------------------------------------------------------------------------------------|------------|----------------------------------|
| 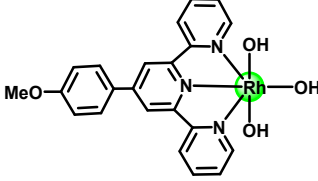 | Singlet    | 0.0                              |
|                                                                                     | Triplet    | 33.4                             |
|                                                                                     | Quintet    | 92.1                             |

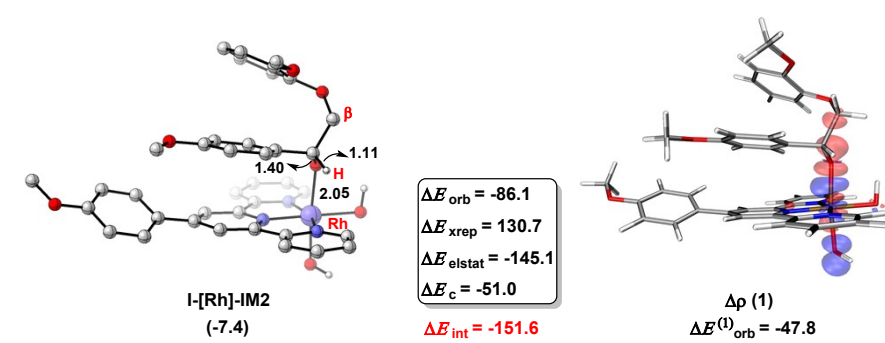

**Figure S1** Results of energy decomposition analysis (EDA). Dominating contributions to the deformation density  $\Delta\rho(1)$  associated with the interaction between Rh-complex and lignin moiety in the I-[Rh]-IM2, determined by the extended transition state- natural orbitals for chemical valence (ETS-NOCV) analysis. The contour value  $|\Delta\rho| = 0.003$  au. The blue/red contours correspond to accumulation/depletion of electron density.

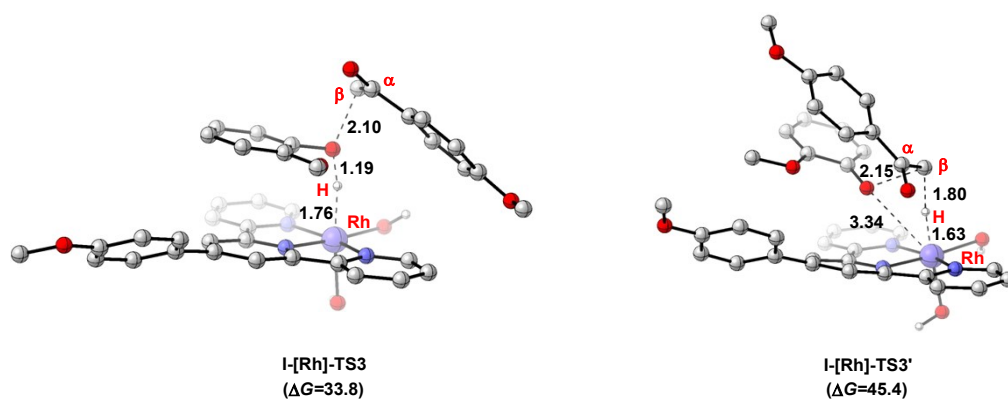

**Figure S2** Optimized geometries of I-[Rh]-TS3 and I-[Rh]-TS3'.

**Table S3** Selected parameters for  $C_{\beta}$ -O,  $C_{\alpha}$ - $C_{\beta}$  and O-Ar<sup>2</sup> bond in species 2, 1a and 1b.

| Species | structure | Bond                       | Bond length(Å) | Wiberg bond index | $E_{BDE}$ (kcal mol <sup>-1</sup> ) <sup>a</sup> | $\Delta G^{\ddagger}$ (kcal mol <sup>-1</sup> ) |
|---------|-----------|----------------------------|----------------|-------------------|--------------------------------------------------|-------------------------------------------------|
| 2       |           | $C_{\beta}$ -O             | 1.43           | 1.41              | 41.1                                             | 40.9                                            |
|         |           | $C_{\alpha}$ - $C_{\beta}$ | 1.53           | 1.16              | 76.6                                             | 55.0                                            |
|         |           | O-Ar <sup>2</sup>          | 1.37           | 1.53              | 87.5                                             | 44.6                                            |
| 1a      |           | $C_{\alpha}$ -O            | 1.46           | 1.34              | 40.2                                             | 38.0                                            |
| 1b      |           | C-O                        | 1.39           | 1.45              | 66.2                                             | 39.9                                            |

<sup>a</sup> Bond dissociation energy was calculated at the TPSSh-D3(BJ)/def2-TZVP (SMD, water) level of theory

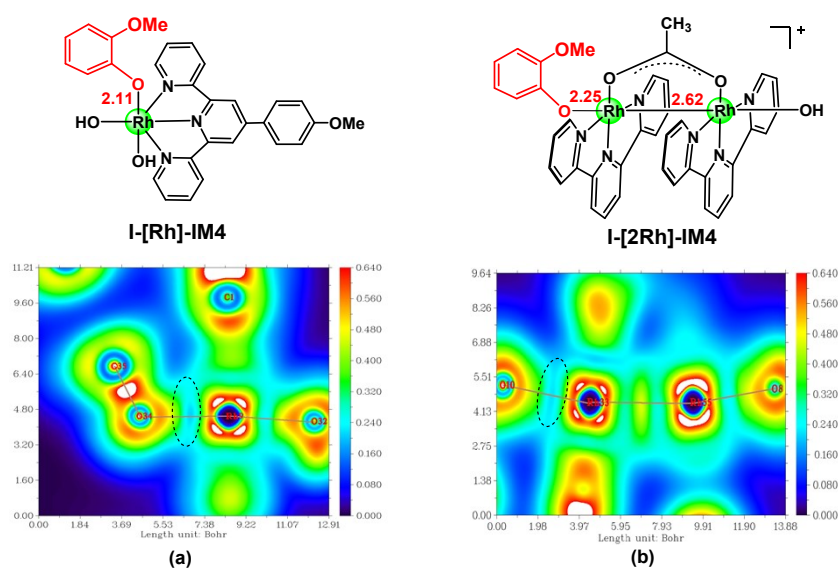

**Figure S3** Results of Localized orbital locator (LOL) calculation for I-[Rh]-IM4 and I-[2Rh]-IM4.

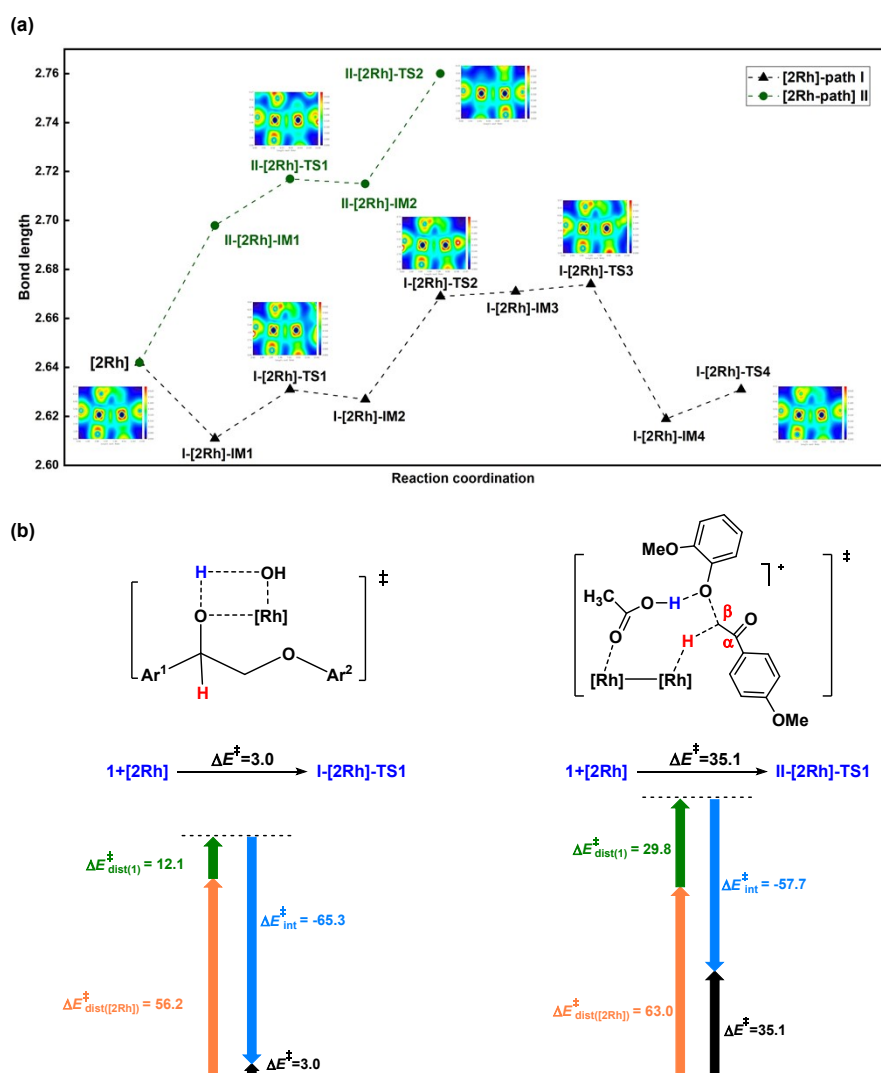

**Figure S4** (a) The bond length and the corresponding Localized orbital locator (LOL) analysis for the stationary points on the potential energy surface along path I-[2Rh] and II-[2Rh]. (b) Distortion-interaction analysis for I-[2Rh]-TS1 and II-[2Rh]-TS1.

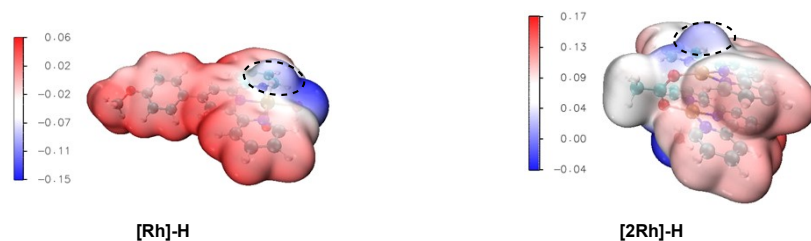

**Figure S5** Electrostatic potential (ESP) analysis for [Rh]-H and [2Rh]-H species.

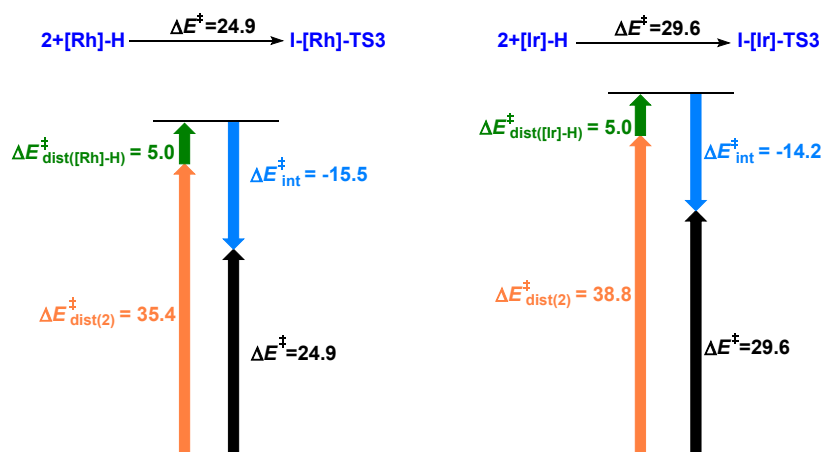

**Figure S6** Distortion interaction analysis for the formation of I-[Rh]-TS3 and I-[Ir]-TS3. The energy is in kcal mol<sup>-1</sup>.

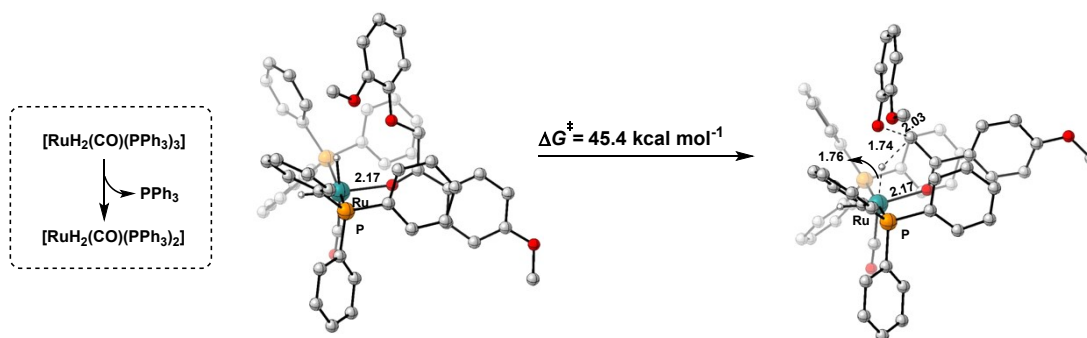

**Figure S7** Activation barrier associated with the C<sub>β</sub>-O bond cleavage in ketone intermediate 2 catalyzed by RuH<sub>2</sub>(CO)PPh<sub>3</sub>.

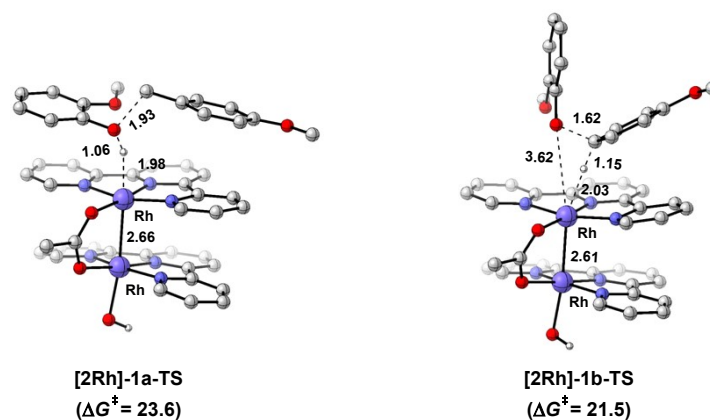

**Figure S8** Optimized geometries of [2Rh]-1a-TS and [2Rh]-1b-TS in the C-O bond cleavage catalyzed by [2Rh]-H species. Relative Gibbs free energy was in kcal mol<sup>-1</sup>.

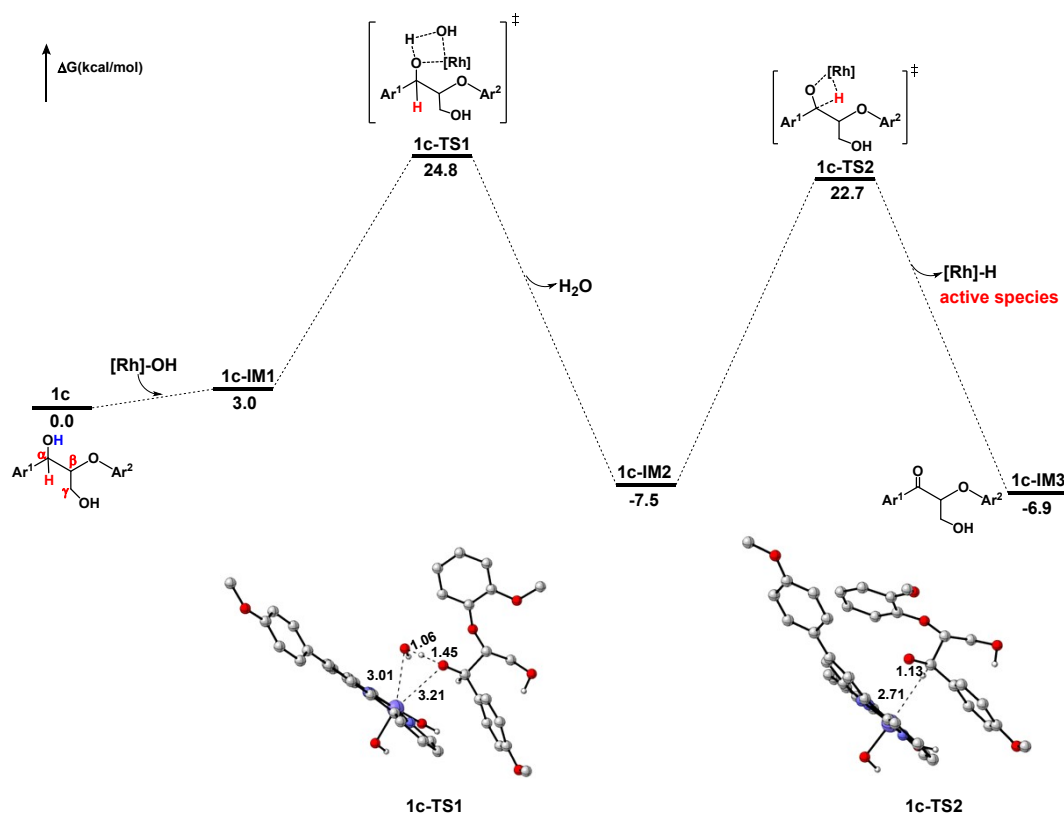

**Figure S9** Energy profile for the formation of C=O group at the C<sub>α</sub> atom of 1c catalyzed by rhodium-terpyridine complex.

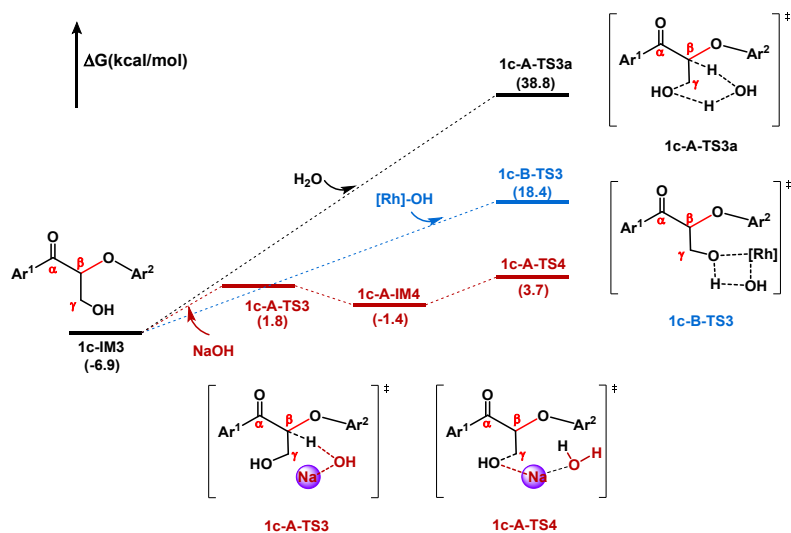

**Figure S10** Energy profiles for the elimination of hydroxyl group in 1c-IM3 along three pathways.

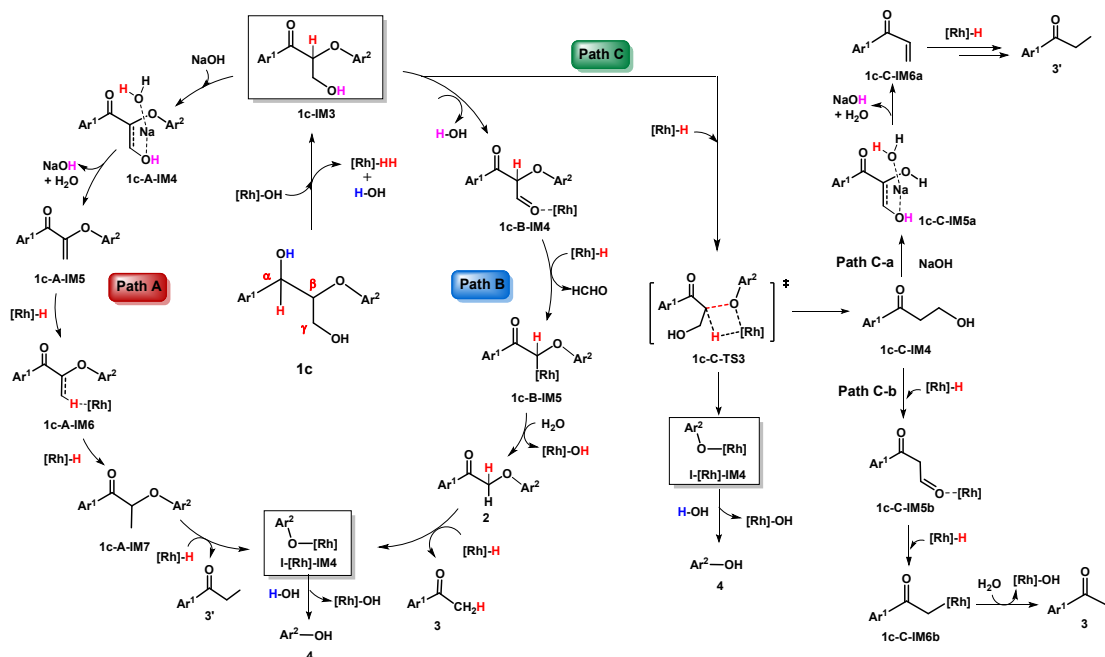

**Scheme S1** Depolymerization mechanism for the  $\beta$ -O-4 model compound with  $\gamma$ -OH functionality (1c), catalyzed by rhodium-terpyridine complex.

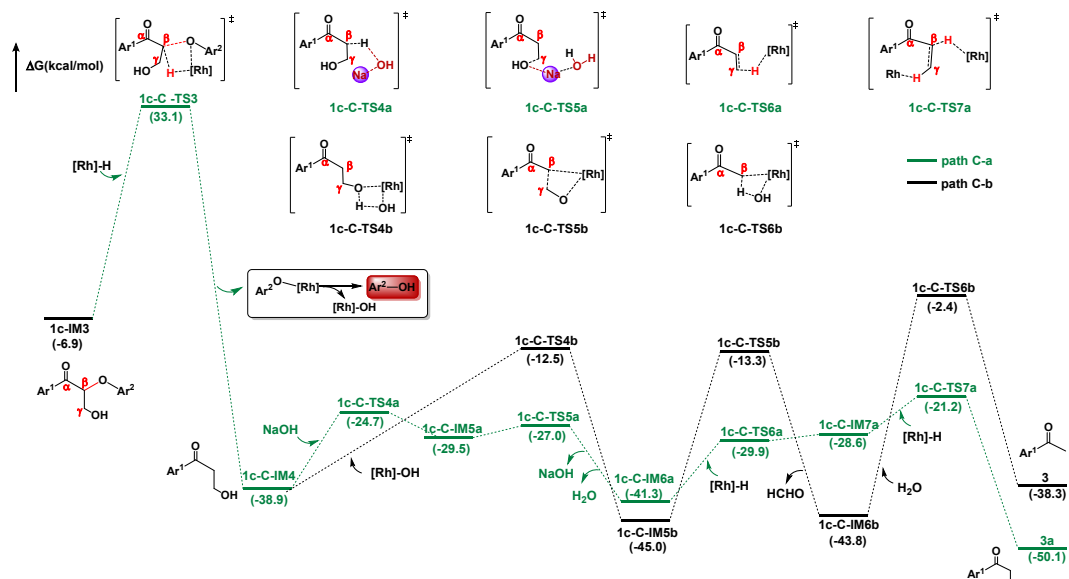

**Figure S11** Energy profiles associated with the depolymerization of  $\beta$ -O-4 model compounds with  $\gamma$ -OH functionality, catalyzed by rhodium-terpyridine complex along path C.

**Table S4** Comparison of relative Gibbs free energy ( $\Delta G$ ) and activation barrier ( $\Delta G^\ddagger$ ), obtained by using different functionals.

| Energy (kcal mol <sup>-1</sup> )            | <sup>a</sup> TPSSH-D3(BJ) | <sup>b</sup> PBE0-D3(BJ) | <sup>c</sup> M06-D3(BJ) | <sup>d</sup> B3LYP-D3(BJ) |
|---------------------------------------------|---------------------------|--------------------------|-------------------------|---------------------------|
| $\Delta G(\text{I-}[\text{Rh}]\text{-IM3})$ | -7.1                      | -10.0                    | -11.1                   | -10.1                     |
| $\Delta G(\text{I-}[\text{Rh}]\text{-TS3})$ | 33.8                      | 42.8                     | 38.1                    | 33.0                      |



|                     |      |      |      |      |
|---------------------|------|------|------|------|
| $\Delta G^\ddagger$ | 40.9 | 52.8 | 49.2 | 43.1 |
|---------------------|------|------|------|------|

<sup>a</sup> Gibbs free energy obtained at the TPSSh-D3(BJ)/def2-TZVP (SMD, water)//TPSSh-D3(BJ)/def2-SVP (SMD, water) theoretical level.

<sup>b</sup> Gibbs free energy obtained at the PBE0-D3(BJ)/def2-TZVP (SMD, water)//PBE0-D3(BJ)/def2-SVP (SMD, water) theoretical level.

<sup>d</sup> Gibbs free energy obtained at the M06-D3/def2-TZVP (SMD, water)//M06-D3/def2-SVP (SMD, water) theoretical level.

<sup>e</sup> Gibbs free energy obtained at the B3LYP-D3(BJ)/def2-TZVP (SMD, water)//B3LYP-D3(BJ)/def2-SVP (SMD, water) theoretical level.

**Table S5** Comparison of relative Gibbs free energy ( $\Delta G$ ) for key species (I-[2Rh]-IM3 and I-[2Rh]-TS3) in binuclear Rh-complex system with or without counterion (Cl<sup>-</sup>).

| $\Delta G(\text{kcal mol}^{-1})$ | I-[2Rh]-IM3 | I-[2Rh]-TS3 |
|----------------------------------|-------------|-------------|
| with Cl anion                    | -3.6        | 26.1        |
| without Cl anion                 | -2.7        | 27.6        |

**Table S6** Electronic energies ( $E_Z$ ), enthalpies ( $H$ ), and Gibbs free energies ( $G$ ) for all stationary points (in Hartree), obtained at the TPSSh-D3(BJ)/def2-SVP (SMD, water) theoretical level. Single-point energy calculations were run at the TPSSh-D3(BJ)/def2-TZVP (SMD, water) level of theory.

| Structures            | <sup>a</sup> ZPE | <sup>b</sup> H <sub>c</sub> | <sup>c</sup> G <sub>c</sub> | $E_{ZPE}$   | $H$         | $G$         | $G^d$       |
|-----------------------|------------------|-----------------------------|-----------------------------|-------------|-------------|-------------|-------------|
| <b>1</b>              | 0.31186          | 0.34265                     | 0.24503                     | -920.54448  | -920.51370  | -920.61132  | -921.60924  |
| <b>1a</b>             | 0.27884          | 0.30606                     | 0.21517                     | -806.11732  | -806.09009  | -806.18098  | -807.04978  |
| <b>1b</b>             | 0.24974          | 0.27513                     | 0.18804                     | -766.85275  | -766.82735  | -766.91444  | -767.74217  |
| <b>1c</b>             | 0.34385          | 0.37898                     | 0.27122                     | -1034.96765 | -1034.93252 | -1035.04028 | -1036.17082 |
| <b>2</b>              | 0.28851          | 0.31853                     | 0.22096                     | -919.36153  | -919.33150  | -919.42907  | -920.42471  |
| <b>2a</b>             | 0.31630          | 0.34885                     | 0.24498                     | -958.62946  | -958.59691  | -958.70078  | -959.74063  |
| <b>3</b>              | 0.17004          | 0.18757                     | 0.11969                     | -498.95545  | -498.93791  | -499.00580  | -499.54864  |
| <b>3a</b>             | 0.19879          | 0.21837                     | 0.14512                     | -538.21832  | -538.19874  | -538.27199  | -538.85533  |
| <b>4</b>              | 0.13691          | 0.13691                     | 0.09202                     | -421.59926  | -421.58529  | -421.64415  | -422.10799  |
| <b>[Rh]-Cl</b>        | 0.34821          | 0.39156                     | 0.26311                     | -2578.09582 | -2578.05247 | -2578.18091 | -2579.82180 |
| <b>[Rh]-OH</b>        | 0.38315          | 0.42791                     | 0.29930                     | -1425.01295 | -1424.96819 | -1425.09680 | -1426.55287 |
| <b>[2Rh]-OH</b>       | 0.54036          | 0.60289                     | 0.44053                     | -2084.69030 | -2084.62777 | -2084.79013 | -2086.83108 |
| <b>I-[Rh]-IM1</b>     | 0.69699          | 0.77281                     | 0.57707                     | -2345.60121 | -2345.52540 | -2345.72114 | -2348.16158 |
| <b>I-[Rh]-TS1</b>     | 0.69418          | 0.76978                     | 0.57208                     | -2345.55798 | -2345.48239 | -2345.68008 | -2348.12673 |
| <b>I-[Rh]-IM2</b>     | 0.67210          | 0.74438                     | 0.55620                     | -2269.24029 | -2269.16801 | -2269.35619 | -2271.70216 |
| <b>I-[Rh]-TS2</b>     | 0.66937          | 0.74181                     | 0.55118                     | -2269.18618 | -2269.11374 | -2269.30437 | -2271.65604 |
| <b>I-[Rh]-IM3</b>     | 0.66838          | 0.74209                     | 0.54712                     | -2269.22692 | -2269.15321 | -2269.34818 | -2271.70166 |
| <b>I-[Rh]-TS3</b>     | 0.66099          | 0.73500                     | 0.54198                     | -2269.16424 | -2269.09023 | -2269.28325 | -2271.63651 |
| <b>I-[Rh]-IM4</b>     | 0.49734          | 0.55281                     | 0.40162                     | -1770.29832 | -1770.24285 | -1770.39404 | -1772.20683 |
| <b>I-[Rh]-TS4</b>     | 0.52248          | 0.58052                     | 0.42263                     | -1846.63441 | -1846.57637 | -1846.73426 | -1848.64166 |
| <b>II-[Rh]-IM1</b>    | 0.69760          | 0.77357                     | 0.57626                     | -2345.55003 | -2345.47405 | -2345.67137 | -2348.11607 |
| <b>II-[Rh]-TS1</b>    | 0.68947          | 0.76601                     | 0.56593                     | -2345.53499 | -2345.45845 | -2345.65853 | -2348.09974 |
| <b>I-[Rh]-TS3'</b>    | 0.66240          | 0.73631                     | 0.54351                     | -2269.14880 | -2269.07488 | -2269.26769 | -2271.61809 |
| <b>I-[Rh]-TS3-Cl</b>  | 0.65081          | 0.72430                     | 0.52896                     | -2653.52687 | -2653.45337 | -2653.64871 | -2656.06484 |
| <b>I-[Rh]-TS3-2Cl</b> | 0.63913          | 0.71248                     | 0.51535                     | -3037.89319 | -3037.81984 | -3038.01697 | -3040.49315 |
| <b>I-[Rh]-TS3a</b>    | 0.66801          | 0.74114                     | 0.54808                     | -2269.15813 | -2269.08500 | -2269.27806 | -2271.63066 |
| <b>I-[Rh]-TS3b</b>    | 0.66588          | 0.73883                     | 0.54981                     | -2269.14989 | -2269.07694 | -2269.26596 | -2271.61401 |

|                     |         |         |         |             |             |             |             |
|---------------------|---------|---------|---------|-------------|-------------|-------------|-------------|
| <b>I-[2Rh]-IM1</b>  | 0.85493 | 0.94816 | 0.71707 | -3005.26322 | -3005.16999 | -3005.40108 | -3008.42777 |
| <b>I-[2Rh]-TS1</b>  | 0.85406 | 0.94648 | 0.71656 | -3005.20441 | -3005.11198 | -3005.34191 | -3008.40458 |
| <b>I-[2Rh]-IM2</b>  | 0.82970 | 0.91963 | 0.69599 | -2928.91355 | -2928.82363 | -2929.04726 | -2931.98095 |
| <b>I-[2Rh]-TS2</b>  | 0.82420 | 0.91411 | 0.69109 | -2928.89896 | -2928.80905 | -2929.03206 | -2931.97007 |
| <b>I-[2Rh]-IM3</b>  | 0.82457 | 0.91561 | 0.68844 | -2928.89859 | -2928.80755 | -2929.03472 | -2931.97297 |
| <b>I-[2Rh]-TS3</b>  | 0.82109 | 0.82109 | 0.68746 | -2928.85763 | -2928.76673 | -2928.99126 | -2931.92465 |
| <b>I-[2Rh]-IM4</b>  | 0.65556 | 0.72746 | 0.54562 | -2429.97754 | -2429.90564 | -2430.08747 | -2432.48644 |
| <b>I-[2Rh]-TS4</b>  | 0.67505 | 0.75127 | 0.55765 | -2506.33569 | -2506.25948 | -2506.45309 | -2508.94706 |
| <b>I-[2Rh]-IM5</b>  | 0.67711 | 0.75379 | 0.55933 | -2506.33372 | -2506.25704 | -2506.45150 | -2508.94546 |
| <b>II-[2Rh]-IM1</b> | 0.85288 | 0.94658 | 0.71442 | -3005.09555 | -3005.00185 | -3005.23401 | -3008.38002 |
| <b>II-[2Rh]-TS1</b> | 0.84599 | 0.93952 | 0.70791 | -3005.09299 | -3004.99945 | -3005.23107 | -3008.36214 |
| <b>II-[2Rh]-IM2</b> | 0.85103 | 0.94539 | 0.71041 | -3005.09978 | -3005.00541 | -3005.24040 | -3008.36936 |
| <b>II-[2Rh]-TS2</b> | 0.84713 | 0.94172 | 0.70783 | -3005.16868 | -3005.07409 | -3005.30798 | -3008.34183 |
| <b>b-TS1</b>        | 0.54420 | 0.60290 | 0.44218 | -1810.71227 | -1810.65357 | -1810.81429 | -1812.67717 |
| <b>b-IM1</b>        | 0.52096 | 0.57700 | 0.42398 | -1734.39984 | -1734.34380 | -1734.49682 | -1736.26237 |
| <b>b-TS2</b>        | 0.51988 | 0.57524 | 0.42317 | -1734.34232 | -1734.28697 | -1734.43903 | -1736.21460 |
| <b>acetophenone</b> | 0.13754 | 0.15119 | 0.09221 | -384.53618  | -384.52253  | -384.58150  | -384.99410  |
| <b>c-TS1</b>        | 0.39924 | 0.44460 | 0.31582 | -1426.12399 | -1426.07863 | -1426.20741 | -1427.66322 |
| <b>I-[Ir]-IM1</b>   | 0.69757 | 0.77300 | 0.57826 | -2339.43375 | -2339.35832 | -2339.55306 | -2341.98087 |
| <b>I-[Ir]-TS1</b>   | 0.69471 | 0.76997 | 0.57368 | -2339.39587 | -2339.32062 | -2339.51690 | -2341.94705 |
| <b>I-[Ir]-IM2</b>   | 0.67150 | 0.74411 | 0.55332 | -2263.07247 | -2262.99986 | -2263.19064 | -2265.52497 |
| <b>I-[Ir]-TS2</b>   | 0.66877 | 0.74102 | 0.55126 | -2263.02628 | -2262.95403 | -2263.14379 | -2265.48027 |
| <b>I-[Ir]-IM3</b>   | 0.66794 | 0.74189 | 0.54620 | -2263.06104 | -2262.98710 | -2263.18279 | -2265.52630 |
| <b>I-[Ir]-TS3</b>   | 0.66126 | 0.73520 | 0.54242 | -2262.99162 | -2262.91769 | -2263.11046 | -2265.45222 |
| <b>I-[Ir]-IM4</b>   | 0.49747 | 0.55276 | 0.40263 | -1764.13052 | -1764.07523 | -1764.22535 | -1766.02509 |
| <b>I-[Ir]-TS4</b>   | 0.52224 | 0.57986 | 0.42396 | -1840.46977 | -1840.41216 | -1840.56806 | -1842.46000 |
| <b>1a-TS</b>        | 0.65417 | 0.72541 | 0.53790 | -2155.91844 | -2155.84720 | -2156.03471 | -2158.26357 |
| <b>1b-TS</b>        | 0.62714 | 0.69562 | 0.51559 | -2116.66045 | -2116.59197 | -2116.77200 | -2118.95295 |
| <b>[2Rh]-1a-TS</b>  | 0.81094 | 0.89947 | 0.67895 | -2815.61435 | -2815.52582 | -2815.74634 | -2818.55044 |
| <b>[2Rh]-1b-TS</b>  | 0.78589 | 0.87199 | 0.65561 | -2776.35178 | -2776.26568 | -2776.48206 | -2779.24915 |
| <b>1c-IM1</b>       | 0.72911 | 0.80946 | 0.59706 | -2460.01222 | -2459.93187 | -2460.14427 | -2462.71890 |
| <b>1c-TS1</b>       | 0.72590 | 0.80599 | 0.59478 | -2459.97673 | -2459.89664 | -2460.10785 | -2462.68414 |

|                  |         |         |         |             |             |             |             |
|------------------|---------|---------|---------|-------------|-------------|-------------|-------------|
| <b>1c-IM2</b>    | 0.70482 | 0.78116 | 0.58335 | -2383.66299 | -2383.58665 | -2383.78446 | -2386.26395 |
| <b>1c-TS2</b>    | 0.70264 | 0.77853 | 0.58135 | -2383.61234 | -2383.53644 | -2383.73362 | -2386.21575 |
| <b>1c-IM3</b>    | 0.32153 | 0.35548 | 0.24907 | -1033.78784 | -1033.75388 | -1033.86029 | -1034.98852 |
| <b>1c-A-TS3</b>  | 0.32902 | 0.36836 | 0.24930 | -1271.84511 | -1271.80576 | -1271.92483 | -1273.19932 |
| <b>1c-A-IM4</b>  | 0.33432 | 0.37399 | 0.25510 | -1271.84809 | -1271.80841 | -1271.92731 | -1273.20440 |
| <b>1c-A-TS4</b>  | 0.33044 | 0.37131 | 0.24980 | -1271.83273 | -1271.79185 | -1271.91336 | -1273.19627 |
| <b>1c-A-IM5</b>  | 0.29281 | 0.32442 | 0.22182 | -957.42116  | -957.38955  | -957.49215  | -958.53087  |
| <b>1c-A-TS5</b>  | 0.67076 | 0.74461 | 0.55447 | -2307.27787 | -2307.20402 | -2307.39416 | -2309.78527 |
| <b>1c-A-IM6</b>  | 0.67509 | 0.74919 | 0.55839 | -2307.27936 | -2307.20526 | -2307.39606 | -2309.78448 |
| <b>1c-A-TS6</b>  | 1.05119 | 1.16850 | 0.88494 | -3657.14336 | -3657.02605 | -3657.30961 | -3661.04700 |
| <b>1c-A-IM7</b>  | 0.31630 | 0.34885 | 0.24498 | -958.62946  | -958.59691  | -958.70078  | -959.74063  |
| <b>1c-A-TS7</b>  | 0.68821 | 0.76478 | 0.56639 | -2308.44097 | -2308.36440 | -2308.56279 | -2310.95420 |
| <b>1c-A-TS3a</b> | 0.34217 | 0.37823 | 0.26680 | -1110.09261 | -1110.05655 | -1110.16797 | -1111.38752 |
| <b>1c-B-TS3</b>  | 0.70566 | 0.78366 | 0.57914 | -2458.79988 | -2458.72188 | -2458.92641 | -2461.50116 |
| <b>1c-B-IM4</b>  | 0.68191 | 0.75746 | 0.55713 | -2382.47598 | -2382.40043 | -2382.60076 | -2385.07954 |
| <b>1c-B-TS4</b>  | 0.67802 | 0.75386 | 0.55612 | -2382.41976 | -2382.34391 | -2382.54166 | -2385.01730 |
| <b>1c-B-IM5</b>  | 0.64875 | 0.72062 | 0.53262 | -2268.06762 | -2267.99575 | -2268.18376 | -2270.52768 |
| <b>1c-B-TS5</b>  | 0.67192 | 0.74734 | 0.54916 | -2344.35891 | -2344.28349 | -2344.48167 | -2346.92204 |
| <b>1c-C-TS3</b>  | 0.69400 | 0.77185 | 0.56913 | -2383.59244 | -2383.51458 | -2383.71730 | -2386.19931 |
| <b>1c-C-IM4</b>  | 0.20398 | 0.22476 | 0.14829 | -613.37736  | -613.35658  | -613.43304  | -614.10711  |
| <b>1c-C-TS4a</b> | 0.21132 | 0.23784 | 0.14787 | -851.41940  | -851.39288  | -851.48285  | -852.30909  |
| <b>1c-C-IM5a</b> | 0.21549 | 0.24290 | 0.15079 | -851.42333  | -851.39593  | -851.48803  | -852.31675  |
| <b>1c-C-TS5a</b> | 0.21189 | 0.24046 | 0.14559 | -851.41367  | -851.38509  | -851.47996  | -852.31277  |
| <b>1c-C-IM6a</b> | 0.17531 | 0.19400 | 0.12324 | -537.00334  | -536.98465  | -537.05541  | -537.63924  |
| <b>1c-C-TS6a</b> | 0.55329 | 0.61448 | 0.44773 | -1886.84808 | -1886.78689 | -1886.95364 | -1888.89550 |
| <b>1c-C-IM7a</b> | 0.55610 | 0.61732 | 0.45290 | -1886.85339 | -1886.79216 | -1886.95659 | -1888.89342 |
| <b>1c-C-TS7a</b> | 0.93277 | 1.03748 | 0.77842 | -3236.71265 | -3236.60794 | -3236.86700 | -3240.15612 |
| <b>1c-C-TS4b</b> | 0.58776 | 0.65217 | 0.48261 | -2038.39660 | -2038.33218 | -2038.50175 | -2040.61797 |
| <b>1c-C-IM5b</b> | 0.56453 | 0.62666 | 0.46124 | -1962.07311 | -1962.01099 | -1962.17640 | -1964.19813 |
| <b>1c-C-TS5b</b> | 0.56025 | 0.62309 | 0.45420 | -1962.01028 | -1961.94745 | -1962.11634 | -1964.14750 |
| <b>1c-C-IM6b</b> | 0.53154 | 0.59004 | 0.43151 | -1847.64324 | -1847.58473 | -1847.74327 | -1849.63869 |
| <b>1c-C-TS6b</b> | 0.55400 | 0.61606 | 0.44930 | -1923.94798 | -1923.88592 | -1924.05268 | -1926.04432 |

<sup>a</sup> Zero-point correction energy;

<sup>b</sup> Thermal correction to enthalpy;

<sup>c</sup> Thermal correction to Gibbs free energy;

<sup>d</sup> Gibbs free energy obtained at the TPSSh-D3(BJ)/def2-TZVP (SMD, water)//TPSSh-D3(BJ)/def2-SVP (SMD, water) theoretical level.

### Cartesian coordinates of all stationary points

|           |          |          |          |           |          |          |          |
|-----------|----------|----------|----------|-----------|----------|----------|----------|
| <b>1</b>  |          |          |          | C         | 2.21741  | 0.52721  | 0.15340  |
| C         | -1.71873 | -0.97145 | -1.03352 | C         | 3.18924  | 0.36502  | -0.83429 |
| C         | -0.37384 | -1.35444 | -1.09314 | C         | 1.61804  | -0.60538 | 0.75301  |
| C         | 0.35026  | -1.66647 | 0.06198  | C         | 3.58237  | -0.91673 | -1.24174 |
| C         | -0.31944 | -1.62790 | 1.29793  | H         | 3.63046  | 1.25903  | -1.28068 |
| C         | -1.65583 | -1.24544 | 1.37810  | C         | 2.01168  | -1.88712 | 0.34097  |
| C         | -2.35993 | -0.89677 | 0.21174  | C         | 2.98827  | -2.03580 | -0.65289 |
| H         | 0.12629  | -1.38692 | -2.06233 | H         | 4.34558  | -1.03462 | -2.01368 |
| H         | 0.21729  | -1.88487 | 2.21508  | H         | 1.55739  | -2.77090 | 0.78988  |
| H         | -2.17474 | -1.20375 | 2.33783  | H         | 3.28266  | -3.04132 | -0.96215 |
| C         | 1.83495  | -1.99703 | 0.01290  | O         | 0.68208  | -0.35784 | 1.70671  |
| H         | 2.00079  | -2.90556 | 0.62415  | C         | -0.11864 | -1.44520 | 2.16106  |
| C         | 2.71738  | -0.93074 | 0.66637  | H         | -0.61611 | -1.94798 | 1.31603  |
| H         | 3.74668  | -1.31021 | 0.72098  | H         | 0.48243  | -2.17684 | 2.72538  |
| O         | 2.83975  | 0.28460  | -0.08876 | H         | -0.87465 | -1.00567 | 2.82316  |
| C         | 1.71249  | 1.00177  | -0.42731 | C         | 0.88112  | 2.43576  | -0.33969 |
| C         | 1.51855  | 1.30747  | -1.77491 | H         | 0.76868  | 3.44958  | 0.06531  |
| C         | 0.80520  | 1.49141  | 0.54298  | H         | 1.33089  | 2.49510  | -1.34401 |
| C         | 0.41270  | 2.06016  | -2.18725 | C         | -1.79132 | -0.13480 | -1.23703 |
| H         | 2.23983  | 0.91319  | -2.49319 | C         | -0.64586 | 0.66821  | -1.29403 |
| C         | -0.31444 | 2.22339  | 0.12402  | C         | -0.42874 | 1.70124  | -0.37274 |
| C         | -0.50800 | 2.50433  | -1.23564 | C         | -1.40474 | 1.93091  | 0.61467  |
| H         | 0.26827  | 2.28190  | -3.24663 | C         | -2.55288 | 1.14880  | 0.68389  |
| H         | -1.03373 | 2.58711  | 0.85790  | C         | -2.74641 | 0.10047  | -0.23586 |
| H         | -1.38551 | 3.07889  | -1.54045 | H         | 0.09899  | 0.47352  | -2.07003 |
| O         | 1.09243  | 1.20711  | 1.84245  | H         | -1.25248 | 2.72736  | 1.34786  |
| C         | 0.16841  | 1.62556  | 2.84329  | H         | -3.31245 | 1.32204  | 1.44894  |
| H         | 0.09073  | 2.72448  | 2.87349  | H         | -1.92562 | -0.93441 | -1.96541 |
| H         | -0.82785 | 1.18819  | 2.67084  | O         | -3.88791 | -0.62974 | -0.08013 |
| H         | 0.57104  | 1.25915  | 3.79532  | C         | -4.11602 | -1.72005 | -0.96900 |
| H         | 2.35484  | -0.72867 | 1.68395  | H         | -5.06693 | -2.16957 | -0.65759 |
| O         | 2.31694  | -2.19208 | -1.30902 | H         | -4.19772 | -1.37382 | -2.01230 |
| H         | 1.81287  | -2.92648 | -1.69753 | H         | -3.31189 | -2.47024 | -0.89229 |
| H         | -2.24575 | -0.71951 | -1.95365 |           |          |          |          |
| O         | -3.65776 | -0.50365 | 0.38467  | <b>1b</b> |          |          |          |
| C         | -4.38850 | -0.09011 | -0.76580 | O         | -0.74594 | -1.11382 | 1.14154  |
| H         | -5.38040 | 0.20765  | -0.40372 | C         | -1.82711 | -0.76774 | 0.34582  |
| H         | -3.90329 | 0.76945  | -1.25709 | C         | -2.58431 | -1.77013 | -0.25224 |
| H         | -4.49562 | -0.91433 | -1.49025 | C         | -2.18176 | 0.59291  | 0.20253  |
|           |          |          |          | C         | -3.71685 | -1.43640 | -1.00774 |
| <b>1a</b> |          |          |          | H         | -2.27421 | -2.80775 | -0.11549 |
| O         | 1.82577  | 1.78802  | 0.56132  | C         | -3.30756 | 0.92127  | -0.56467 |

|   |          |          |          |   |          |          |          |
|---|----------|----------|----------|---|----------|----------|----------|
| C | -4.06813 | -0.09361 | -1.16253 | C | -1.00299 | 2.21920  | 0.23873  |
| H | -4.31223 | -2.22378 | -1.47384 | C | -1.41082 | 2.53097  | -1.06575 |
| H | -3.59920 | 1.96420  | -0.69035 | H | -0.90023 | 2.47623  | -3.17108 |
| H | -4.94564 | 0.17973  | -1.75268 | H | -1.64692 | 2.47276  | 1.08090  |
| O | -1.38019 | 1.48743  | 0.83552  | H | -2.37663 | 3.01738  | -1.21947 |
| C | -1.64993 | 2.87659  | 0.65739  | O | 0.72754  | 1.30097  | 1.69731  |
| H | -1.58987 | 3.15625  | -0.40671 | C | -0.08657 | 1.57489  | 2.83422  |
| H | -2.64269 | 3.14138  | 1.05532  | H | -0.27718 | 2.65597  | 2.93140  |
| H | -0.87393 | 3.40682  | 1.22235  | H | -1.04419 | 1.03345  | 2.77540  |
| C | 2.13613  | -0.05919 | -0.95308 | H | 0.48280  | 1.22228  | 3.70267  |
| C | 0.81880  | -0.37387 | -0.59187 | H | 2.07722  | -0.47459 | 1.25384  |
| C | 0.52772  | -0.76015 | 0.71717  | O | 1.85243  | -1.77918 | -1.79901 |
| C | 1.54977  | -0.84106 | 1.67237  | H | 1.41445  | -2.56348 | -2.16910 |
| C | 2.85922  | -0.53411 | 1.31339  | H | -2.88791 | -0.84420 | -1.74789 |
| C | 3.16314  | -0.13855 | -0.00169 | O | -3.97797 | -0.88091 | 0.76585  |
| H | 0.02585  | -0.31621 | -1.33983 | C | -4.90605 | -0.53107 | -0.25622 |
| H | 1.30539  | -1.14456 | 2.69204  | H | -5.86647 | -0.36992 | 0.24901  |
| H | 3.66610  | -0.59284 | 2.04657  | H | -4.60126 | 0.39556  | -0.77006 |
| H | 2.34203  | 0.24244  | -1.98015 | H | -5.01245 | -1.34237 | -0.99523 |
| O | 4.47726  | 0.14686  | -0.25904 | C | 3.86854  | -0.94276 | 0.17632  |
| C | 4.82714  | 0.53637  | -1.58236 | H | 4.00337  | -1.94549 | 0.62089  |
| H | 5.90990  | 0.71308  | -1.57056 | H | 4.20839  | -0.98339 | -0.87343 |
| H | 4.59378  | -0.26016 | -2.30859 | O | 4.56669  | 0.05109  | 0.91241  |
| H | 4.30808  | 1.46367  | -1.87730 | H | 5.51492  | -0.13205 | 0.81763  |

**1c**

|   |          |          |          |
|---|----------|----------|----------|
| C | -2.21425 | -1.06669 | -0.92053 |
| C | -0.85675 | -1.28960 | -1.17914 |
| C | 0.04960  | -1.55604 | -0.14842 |
| C | -0.44203 | -1.63993 | 1.16636  |
| C | -1.78804 | -1.41771 | 1.44395  |
| C | -2.68115 | -1.11233 | 0.40136  |
| H | -0.49422 | -1.23032 | -2.20648 |
| H | 0.24113  | -1.86616 | 1.98935  |
| H | -2.17023 | -1.47143 | 2.46525  |
| C | 1.53766  | -1.72602 | -0.41532 |
| H | 1.86515  | -2.65398 | 0.09046  |
| C | 2.38972  | -0.60670 | 0.20784  |
| O | 2.27044  | 0.64609  | -0.49701 |
| C | 1.04277  | 1.24879  | -0.64299 |
| C | 0.63421  | 1.58555  | -1.93419 |
| C | 0.23402  | 1.60007  | 0.46477  |
| C | -0.58926 | 2.22900  | -2.15399 |
| H | 1.28569  | 1.30151  | -2.76268 |

**2**

|   |          |          |          |
|---|----------|----------|----------|
| C | -2.22496 | 0.07100  | -0.93736 |
| C | -0.97561 | -0.46845 | -1.24222 |
| C | -0.37597 | -1.43030 | -0.40874 |
| C | -1.07051 | -1.84909 | 0.74789  |
| C | -2.30230 | -1.30610 | 1.07462  |
| C | -2.88890 | -0.33692 | 0.23316  |
| H | -0.47159 | -0.14424 | -2.15265 |
| H | -0.61214 | -2.60031 | 1.39374  |
| H | -2.83637 | -1.60913 | 1.97703  |
| C | 0.94324  | -2.03703 | -0.68213 |
| C | 1.96127  | -1.36438 | -1.59827 |
| H | 1.84646  | -1.80360 | -2.60181 |
| O | 1.85894  | 0.04213  | -1.81824 |
| C | 1.67996  | 0.96894  | -0.82108 |
| C | 1.26671  | 2.23445  | -1.25291 |
| C | 1.86990  | 0.74081  | 0.56222  |
| C | 1.02584  | 3.26704  | -0.34187 |
| H | 1.12343  | 2.38209  | -2.32529 |

|           |          |          |          |           |          |          |          |
|-----------|----------|----------|----------|-----------|----------|----------|----------|
| C         | 1.60659  | 1.77365  | 1.47215  | H         | 5.79840  | 2.19776  | 0.53946  |
| C         | 1.18877  | 3.03285  | 1.02556  | H         | 5.50512  | 2.31745  | -1.23270 |
| H         | 0.70062  | 4.24402  | -0.70517 | H         | 4.75252  | 3.50381  | -0.11376 |
| H         | 1.73980  | 1.59274  | 2.53913  | H         | -4.09039 | -2.40760 | -0.15016 |
| H         | 0.99539  | 3.82380  | 1.75309  | O         | -6.05438 | -0.80583 | -0.32967 |
| O         | 2.29631  | -0.49977 | 0.93289  | C         | -7.10871 | 0.15375  | -0.43278 |
| C         | 2.16856  | -0.88867 | 2.29769  | H         | -8.03359 | -0.42846 | -0.51995 |
| H         | 2.88792  | -0.34619 | 2.93178  | H         | -7.15283 | 0.78750  | 0.46687  |
| H         | 1.14413  | -0.71287 | 2.66263  | H         | -6.98074 | 0.78333  | -1.32725 |
| H         | 2.39392  | -1.96182 | 2.32355  | O         | -0.35799 | 1.99543  | 0.09540  |
| H         | 2.95625  | -1.63508 | -1.21829 | C         | 0.36068  | -0.66240 | 1.95176  |
| O         | 1.26575  | -3.12359 | -0.19780 | H         | -0.60093 | -1.13837 | 2.18913  |
| H         | -2.66960 | 0.80673  | -1.60678 | H         | 1.16620  | -1.38033 | 2.16396  |
| O         | -4.09038 | 0.14385  | 0.62990  | H         | 0.49062  | 0.22030  | 2.59524  |
| C         | -4.72751 | 1.13970  | -0.17200 | H         | 0.26333  | -1.10218 | -0.17995 |
| H         | -5.66633 | 1.38028  | 0.34082  |           |          |          |          |
| H         | -4.10277 | 2.04387  | -0.24547 | <b>3</b>  |          |          |          |
| H         | -4.94464 | 0.75381  | -1.18055 | H         | -3.33508 | 1.52761  | -0.88627 |
|           |          |          |          | C         | 1.14202  | -0.99558 | -0.00001 |
| <b>2a</b> |          |          |          | C         | -0.24083 | -1.15487 | -0.00000 |
| C         | -3.78774 | -1.35967 | -0.11714 | C         | -1.11103 | -0.04902 | 0.00001  |
| C         | -2.45301 | -1.00274 | 0.01089  | C         | -0.54920 | 1.24638  | -0.00007 |
| C         | -2.06949 | 0.35716  | 0.04845  | C         | 0.82797  | 1.42302  | -0.00015 |
| C         | -3.07535 | 1.33756  | -0.05386 | C         | 1.68483  | 0.30422  | -0.00011 |
| C         | -4.41763 | 0.99570  | -0.18141 | H         | -0.67163 | -2.15798 | 0.00003  |
| C         | -4.78175 | -0.36489 | -0.21149 | H         | -1.19225 | 2.12802  | -0.00001 |
| H         | -1.70711 | -1.79631 | 0.07350  | H         | 1.26990  | 2.42102  | -0.00022 |
| H         | -2.78337 | 2.38901  | -0.02730 | C         | -2.57621 | -0.28851 | -0.00002 |
| H         | -5.17140 | 1.77924  | -0.25459 | C         | -3.50948 | 0.89753  | 0.00026  |
| C         | -0.66693 | 0.80868  | 0.18266  | H         | -4.54712 | 0.54077  | 0.00030  |
| C         | 0.41128  | -0.23587 | 0.48274  | H         | -3.33491 | 1.52718  | 0.88709  |
| O         | 1.66025  | 0.38788  | 0.18460  | O         | -3.02709 | -1.43752 | -0.00021 |
| C         | 2.76164  | -0.39115 | -0.03247 | H         | 1.78794  | -1.87337 | 0.00007  |
| C         | 2.76918  | -1.78543 | -0.11664 | O         | 3.01213  | 0.57153  | -0.00020 |
| C         | 3.97576  | 0.32840  | -0.19317 | C         | 3.93195  | -0.52149 | 0.00027  |
| C         | 3.96924  | -2.47206 | -0.36606 | H         | 4.93142  | -0.07067 | 0.00038  |
| H         | 1.84509  | -2.34973 | 0.01128  | H         | 3.80542  | -1.14216 | 0.90137  |
| C         | 5.16364  | -0.36425 | -0.44177 | H         | 3.80584  | -1.14261 | -0.90058 |
| C         | 5.15920  | -1.76620 | -0.52804 |           |          |          |          |
| H         | 3.95682  | -3.56222 | -0.42825 | <b>3a</b> |          |          |          |
| H         | 6.09787  | 0.18333  | -0.56808 | C         | 1.07248  | -1.35094 | -0.31636 |
| H         | 6.09590  | -2.29361 | -0.72060 | C         | -0.28148 | -1.05067 | -0.38319 |
| O         | 3.87004  | 1.68441  | -0.09008 | C         | -0.74041 | 0.27026  | -0.18444 |
| C         | 5.05751  | 2.45706  | -0.23481 | C         | 0.21144  | 1.27306  | 0.08118  |



|                |          |          |          |    |          |          |          |
|----------------|----------|----------|----------|----|----------|----------|----------|
| C              | 1.57213  | 0.98967  | 0.15040  | C  | -1.61478 | -1.30586 | -0.00907 |
| C              | 2.01039  | -0.33398 | -0.04934 | C  | -0.22308 | -1.23258 | 0.00116  |
| H              | -0.98600 | -1.85622 | -0.59547 | N  | 0.37111  | -0.02350 | -0.02434 |
| H              | -0.13853 | 2.29553  | 0.23547  | H  | -2.25178 | 2.05415  | -0.13082 |
| H              | 2.28264  | 1.78950  | 0.35782  | H  | -2.10253 | -2.27817 | 0.03743  |
| C              | -2.17501 | 0.64757  | -0.24240 | Rh | 2.30818  | 0.04567  | 0.01331  |
| C              | -3.22719 | -0.42759 | -0.42825 | C  | 0.57847  | 2.32387  | -0.08217 |
| H              | 1.43334  | -2.36944 | -0.47004 | C  | 0.12993  | 3.64487  | -0.12419 |
| O              | 3.30796  | -0.71707 | -0.00414 | C  | 1.06636  | 4.68134  | -0.14437 |
| C              | 4.30624  | 0.27143  | 0.25558  | C  | 2.42801  | 4.37459  | -0.12184 |
| H              | 5.26400  | -0.26222 | 0.24620  | C  | 2.81813  | 3.03604  | -0.07802 |
| H              | 4.30617  | 1.04628  | -0.52732 | N  | 1.91779  | 2.04606  | -0.05833 |
| H              | 4.15174  | 0.73788  | 1.24140  | H  | 0.73088  | 5.71900  | -0.17773 |
| O              | -2.52050 | 1.82491  | -0.10106 | H  | -0.93895 | 3.85706  | -0.14144 |
| C              | -3.53487 | -1.14967 | 0.89300  | H  | 3.18858  | 5.15591  | -0.13690 |
| H              | -3.86635 | -0.43184 | 1.65925  | H  | 3.86312  | 2.72036  | -0.05549 |
| H              | -4.33790 | -1.88704 | 0.74262  | C  | 3.02612  | -2.89981 | 0.11258  |
| H              | -4.13267 | 0.07592  | -0.79661 | C  | 2.73214  | -4.26325 | 0.13942  |
| H              | -2.65110 | -1.67983 | 1.27972  | C  | 1.39600  | -4.66658 | 0.12003  |
| H              | -2.90739 | -1.15614 | -1.18858 | C  | 0.38852  | -3.69996 | 0.07437  |
| <b>4</b>       |          |          |          | C  | 0.74157  | -2.34977 | 0.04992  |
| O              | 0.08192  | 2.26622  | -0.00003 | N  | 2.05782  | -1.97710 | 0.06946  |
| C              | 0.51809  | 0.96952  | -0.00002 | H  | 1.13487  | -5.72579 | 0.13967  |
| C              | 1.86798  | 0.61503  | -0.00002 | H  | 4.04597  | -2.50990 | 0.12472  |
| C              | -0.47508 | -0.04061 | -0.00001 | H  | 3.54611  | -4.98804 | 0.17459  |
| C              | 2.24906  | -0.73527 | -0.00000 | H  | -0.66211 | -3.98927 | 0.05785  |
| H              | 2.61763  | 1.41139  | -0.00002 | C  | -3.85405 | -0.16867 | -0.06304 |
| C              | -0.08915 | -1.38506 | 0.00000  | C  | -4.62101 | 0.89506  | 0.44848  |
| C              | 1.27212  | -1.73108 | 0.00001  | C  | -4.54294 | -1.28451 | -0.58880 |
| H              | 3.30949  | -0.99626 | 0.00000  | C  | -6.01566 | 0.86045  | 0.44649  |
| H              | -0.84710 | -2.16905 | 0.00001  | H  | -4.12528 | 1.76418  | 0.88498  |
| H              | 1.55549  | -2.78579 | 0.00002  | C  | -5.93050 | -1.32908 | -0.60633 |
| O              | -1.76616 | 0.40494  | -0.00002 | H  | -3.98646 | -2.12007 | -1.01718 |
| C              | -2.80367 | -0.56995 | 0.00006  | C  | -6.68094 | -0.25682 | -0.08690 |
| H              | -2.75456 | -1.20519 | 0.90004  | H  | -6.57196 | 1.69861  | 0.86531  |
| H              | -3.74603 | -0.00827 | 0.00009  | H  | -6.45939 | -2.18593 | -1.02747 |
| H              | -2.75466 | -1.20525 | -0.89987 | O  | -8.03043 | -0.38669 | -0.14276 |
| H              | 0.85768  | 2.85359  | -0.00005 | C  | -8.83799 | 0.67825  | 0.35882  |
|                |          |          |          | H  | -8.65087 | 1.61117  | -0.19660 |
|                |          |          |          | H  | -9.87731 | 0.36257  | 0.20837  |
|                |          |          |          | H  | -8.65366 | 0.84223  | 1.43262  |
| <b>[Rh]-Cl</b> |          |          |          | Cl | 2.18551  | 0.12049  | 2.37903  |
| C              | -0.30525 | 1.14151  | -0.05931 | Cl | 2.30530  | -0.04309 | -2.35563 |
| C              | -1.69807 | 1.11818  | -0.07701 | Cl | 4.69200  | 0.13802  | 0.07265  |
| C              | -2.37908 | -0.11891 | -0.05005 |    |          |          |          |

|                |          |          |          |                 |          |          |          |
|----------------|----------|----------|----------|-----------------|----------|----------|----------|
|                |          |          |          | C               | 6.39520  | -0.26796 | 0.08054  |
|                |          |          |          | H               | 6.28575  | 1.66908  | -0.90809 |
| <b>[Rh]-OH</b> |          |          |          | H               | 6.17336  | -2.17774 | 1.05923  |
| C              | 0.02087  | 1.14695  | 0.05976  | O               | 7.74573  | -0.40079 | 0.13070  |
| C              | 1.41401  | 1.12020  | 0.07444  | C               | 8.55174  | 0.65209  | -0.39705 |
| C              | 2.09132  | -0.11895 | 0.06267  | H               | 8.37085  | 1.59638  | 0.14111  |
| C              | 1.32332  | -1.30397 | 0.03693  | H               | 9.59162  | 0.33741  | -0.24800 |
| C              | -0.06873 | -1.22551 | 0.02503  | H               | 8.36042  | 0.79593  | -1.47261 |
| N              | -0.66651 | -0.01522 | 0.03874  |                 |          |          |          |
| H              | 1.97221  | 2.05454  | 0.11282  | <b>[2Rh]-OH</b> |          |          |          |
| H              | 1.81062  | -2.27732 | 0.00239  | C               | 0.55600  | 2.01582  | 1.62627  |
| Rh             | -2.60942 | 0.06339  | 0.03623  | C               | 0.30758  | 3.38699  | 1.71193  |
| C              | -0.85845 | 2.33385  | 0.05562  | C               | -1.01328 | 3.84351  | 1.62687  |
| C              | -0.40774 | 3.65566  | 0.05691  | C               | -2.06738 | 2.93760  | 1.48258  |
| C              | -1.34078 | 4.69493  | 0.03329  | C               | -1.78034 | 1.57098  | 1.40463  |
| C              | -2.70441 | 4.39256  | 0.00722  | N               | -0.48595 | 1.15812  | 1.44863  |
| C              | -3.09647 | 3.05471  | 0.00964  | H               | 1.13145  | 4.08795  | 1.84060  |
| N              | -2.20011 | 2.05939  | 0.03532  | H               | -3.09833 | 3.28625  | 1.43079  |
| H              | -1.00206 | 5.73212  | 0.03370  | Rh              | -0.12072 | -0.71777 | 1.31330  |
| H              | 0.66160  | 3.86626  | 0.07404  | C               | 1.84539  | 1.32409  | 1.73130  |
| H              | -3.46172 | 5.17699  | -0.01403 | C               | 3.06818  | 1.95308  | 1.98705  |
| H              | -4.14221 | 2.74200  | -0.00929 | C               | 4.21548  | 1.17697  | 2.13941  |
| C              | -3.32322 | -2.88506 | -0.13211 | C               | 4.11366  | -0.21627 | 2.05210  |
| C              | -3.03387 | -4.24687 | -0.20786 | C               | 2.87451  | -0.78714 | 1.77970  |
| C              | -1.69796 | -4.65321 | -0.18593 | N               | 1.77200  | -0.03915 | 1.59771  |
| C              | -0.68958 | -3.69059 | -0.09978 | H               | 5.17733  | 1.65298  | 2.33557  |
| C              | -1.03774 | -2.33992 | -0.03255 | H               | 3.11090  | 3.03861  | 2.07130  |
| N              | -2.35526 | -1.96294 | -0.03695 | H               | 4.98445  | -0.85956 | 2.17910  |
| H              | -1.43827 | -5.71161 | -0.24034 | H               | 2.73910  | -1.86551 | 1.69113  |
| H              | -4.34325 | -2.49653 | -0.14445 | C               | -2.93591 | -1.87605 | 1.18094  |
| H              | -3.84831 | -4.96823 | -0.28176 | C               | -4.32643 | -1.79264 | 1.21175  |
| H              | 0.36020  | -3.98340 | -0.09184 | C               | -4.92931 | -0.53392 | 1.27451  |
| O              | -2.77715 | 0.11675  | -1.99253 | C               | -4.12173 | 0.60253  | 1.32146  |
| H              | -3.05260 | -0.78671 | -2.22471 | C               | -2.73167 | 0.45862  | 1.30131  |
| O              | -4.63995 | 0.16377  | 0.02476  | N               | -2.15380 | -0.78410 | 1.21219  |
| H              | -4.74390 | 0.21156  | -0.94452 | H               | -6.01565 | -0.43553 | 1.28800  |
| O              | -2.58779 | 0.02458  | 2.07412  | H               | -2.42345 | -2.83696 | 1.13267  |
| H              | -3.46839 | 0.37202  | 2.29608  | H               | -4.91828 | -2.70765 | 1.17947  |
| C              | 3.56734  | -0.17231 | 0.07080  | H               | -4.56076 | 1.59766  | 1.38195  |
| C              | 4.33485  | 0.87853  | -0.46549 | H               | -1.22100 | 4.91267  | 1.67974  |
| C              | 4.25667  | -1.27893 | 0.61458  | Rh              | 0.11739  | -0.70781 | -1.31746 |
| C              | 5.72985  | 0.84047  | -0.47005 | O               | 0.21662  | -2.77138 | 1.08577  |
| H              | 3.83902  | 1.74037  | -0.91628 | C               | 1.05528  | 3.84553  | -1.60316 |
| C              | 5.64465  | -1.32742 | 0.62471  | C               | -0.27013 | 3.40283  | -1.69049 |
| H              | 3.70013  | -2.10454 | 1.06201  |                 |          |          |          |

|                   |          |          |          |    |          |          |          |
|-------------------|----------|----------|----------|----|----------|----------|----------|
| C                 | 2.10042  | 2.92843  | -1.46425 | C  | 1.35412  | 0.93409  | -0.49797 |
| C                 | -0.53236 | 2.03378  | -1.61168 | C  | 1.78990  | 0.95718  | 0.83634  |
| H                 | -1.08683 | 4.11268  | -1.81630 | C  | 3.07023  | 0.52975  | 1.18340  |
| C                 | 1.79961  | 1.56439  | -1.39365 | C  | 3.95430  | 0.07019  | 0.19221  |
| H                 | 3.13495  | 3.26620  | -1.41146 | H  | 1.90941  | 0.36937  | -2.51096 |
| N                 | 0.50110  | 1.16511  | -1.43818 | H  | 1.11618  | 1.32643  | 1.60968  |
| H                 | 1.27360  | 4.91283  | -1.65084 | H  | 3.41005  | 0.55681  | 2.22056  |
| C                 | -1.82843 | 1.35510  | -1.72185 | C  | -0.02295 | 1.43693  | -0.90046 |
| C                 | -3.04494 | 1.99715  | -1.97497 | C  | 0.03014  | 2.58375  | -1.92665 |
| C                 | -4.19937 | 1.23293  | -2.13377 | H  | -0.98135 | 2.74957  | -2.32286 |
| C                 | -4.11102 | -0.16169 | -2.05472 | O  | 0.38927  | 3.85429  | -1.35520 |
| C                 | -2.87771 | -0.74594 | -1.78443 | C  | 1.54357  | 3.93657  | -0.60618 |
| N                 | -1.76826 | -0.00962 | -1.59710 | C  | 1.44178  | 4.33385  | 0.72707  |
| H                 | -5.15634 | 1.71926  | -2.32842 | C  | 2.81686  | 3.69056  | -1.17332 |
| H                 | -3.07737 | 3.08350  | -2.05254 | C  | 2.58492  | 4.45220  | 1.52683  |
| H                 | -4.98776 | -0.79587 | -2.18664 | H  | 0.44349  | 4.51360  | 1.12969  |
| H                 | -2.75286 | -1.82608 | -1.70199 | C  | 3.95717  | 3.78582  | -0.36418 |
| C                 | 2.92077  | -1.89539 | -1.18813 | C  | 3.83753  | 4.16349  | 0.98074  |
| C                 | 4.31207  | -1.82567 | -1.22074 | H  | 2.49049  | 4.75241  | 2.57245  |
| C                 | 4.92738  | -0.57286 | -1.28042 | H  | 4.94227  | 3.57530  | -0.78088 |
| C                 | 4.13115  | 0.57186  | -1.32108 | H  | 4.73772  | 4.23366  | 1.59536  |
| C                 | 2.73983  | 0.44170  | -1.29866 | O  | 2.83704  | 3.36558  | -2.49449 |
| N                 | 2.14976  | -0.79562 | -1.21506 | C  | 4.09495  | 3.06699  | -3.09384 |
| H                 | 6.01462  | -0.48535 | -1.29575 | H  | 4.76136  | 3.94447  | -3.06879 |
| H                 | 2.39859  | -2.85112 | -1.14044 | H  | 4.58323  | 2.21724  | -2.59058 |
| H                 | 4.89496  | -2.74654 | -1.19191 | H  | 3.87599  | 2.80102  | -4.13504 |
| H                 | 4.57987  | 1.56286  | -1.37822 | H  | 0.70005  | 2.32885  | -2.76201 |
| O                 | -0.24370 | -2.76007 | -1.11260 | H  | 4.17977  | -0.37337 | -1.92357 |
| C                 | -0.02318 | -3.36011 | -0.01448 | O  | 5.19978  | -0.30923 | 0.61440  |
| C                 | -0.08607 | -4.86315 | -0.00974 | C  | 6.16661  | -0.63921 | -0.37835 |
| H                 | -1.14011 | -5.16298 | 0.11134  | H  | 7.09621  | -0.85505 | 0.16245  |
| H                 | 0.27769  | -5.26758 | -0.96335 | H  | 5.86716  | -1.52735 | -0.95617 |
| H                 | 0.49068  | -5.27001 | 0.83034  | H  | 6.32716  | 0.20845  | -1.06539 |
| O                 | 0.20677  | -1.10231 | -3.40602 | H  | -0.53354 | 0.61149  | -1.43616 |
| H                 | 1.13231  | -1.36046 | -3.55342 | O  | -0.77077 | 1.82212  | 0.23131  |
| O                 | -0.21144 | -1.13282 | 3.39789  | C  | -1.71503 | -1.77026 | -0.79952 |
| H                 | -1.13007 | -1.41959 | 3.53535  | C  | -0.46221 | -2.38083 | -0.77594 |
|                   |          |          |          | C  | 0.35559  | -2.26400 | 0.36964  |
|                   |          |          |          | C  | -0.15171 | -1.54578 | 1.47591  |
|                   |          |          |          | C  | -1.40842 | -0.95415 | 1.40360  |
|                   |          |          |          | N  | -2.14109 | -1.08272 | 0.27902  |
|                   |          |          |          | H  | -0.12434 | -2.93663 | -1.64846 |
|                   |          |          |          | H  | 0.44834  | -1.40622 | 2.37203  |
|                   |          |          |          | Rh | -3.89425 | -0.24209 | 0.21680  |
| <b>I-[Rh]-IM1</b> |          |          |          |    |          |          |          |
| O                 | -3.21892 | 1.54679  | -0.52672 |    |          |          |          |
| H                 | -3.10110 | 1.40559  | -1.48230 |    |          |          |          |
| H                 | -1.75299 | 1.74911  | -0.03642 |    |          |          |          |
| C                 | 3.52548  | 0.01077  | -1.14143 |    |          |          |          |
| C                 | 2.22987  | 0.42864  | -1.46761 |    |          |          |          |

|                   |          |          |          |   |          |          |          |
|-------------------|----------|----------|----------|---|----------|----------|----------|
| C                 | -2.68035 | -1.72974 | -1.91764 | C | -3.08123 | -0.69821 | 0.89456  |
| C                 | -2.46232 | -2.30150 | -3.17263 | C | -2.03890 | -0.56251 | -0.03024 |
| C                 | -3.43366 | -2.16080 | -4.16629 | C | -1.06378 | -1.55572 | -0.19400 |
| C                 | -4.60156 | -1.44772 | -3.88713 | C | -1.14593 | -2.69685 | 0.61787  |
| C                 | -4.76751 | -0.90115 | -2.61551 | C | -2.17974 | -2.85934 | 1.53679  |
| N                 | -3.83943 | -1.04538 | -1.65920 | C | -3.15688 | -1.86033 | 1.67937  |
| H                 | -3.27413 | -2.60188 | -5.15151 | H | -1.99264 | 0.34677  | -0.63617 |
| H                 | -1.53778 | -2.84440 | -3.36894 | H | -0.37805 | -3.46406 | 0.51354  |
| H                 | -5.37975 | -1.31116 | -4.63864 | H | -2.24459 | -3.75130 | 2.16351  |
| H                 | -5.65350 | -0.33159 | -2.32930 | C | 0.06353  | -1.40205 | -1.21583 |
| C                 | -3.97829 | 1.16946  | 2.90213  | C | -0.47761 | -1.33193 | -2.66210 |
| C                 | -3.45397 | 1.56005  | 4.13335  | H | 0.34257  | -1.01341 | -3.32103 |
| C                 | -2.19479 | 1.08683  | 4.50958  | O | -0.87025 | -2.60895 | -3.20740 |
| C                 | -1.49315 | 0.24318  | 3.64552  | C | -1.77285 | -3.37490 | -2.50740 |
| C                 | -2.06580 | -0.11037 | 2.42235  | C | -1.37771 | -4.64735 | -2.09369 |
| N                 | -3.30531 | 0.35689  | 2.07639  | C | -3.09499 | -2.93334 | -2.25859 |
| H                 | -1.75674 | 1.37386  | 5.46686  | C | -2.26412 | -5.48439 | -1.40528 |
| H                 | -4.95469 | 1.49990  | 2.54309  | H | -0.34644 | -4.94469 | -2.29172 |
| H                 | -4.02964 | 2.22397  | 4.77900  | C | -3.97345 | -3.76369 | -1.54942 |
| H                 | -0.50558 | -0.13274 | 3.91230  | C | -3.55607 | -5.03349 | -1.12522 |
| O                 | -5.75564 | 0.56557  | 0.19325  | H | -1.93782 | -6.47359 | -1.07728 |
| H                 | -5.55836 | 1.45988  | -0.13714 | H | -4.98803 | -3.42868 | -1.33289 |
| O                 | -4.67774 | -1.94623 | 0.98149  | H | -4.25570 | -5.66725 | -0.57566 |
| H                 | -5.63210 | -1.76453 | 0.94048  | O | -3.42070 | -1.69987 | -2.73545 |
| C                 | 1.72758  | -2.80828 | 0.39155  | C | -4.71620 | -1.18625 | -2.44102 |
| C                 | 2.46696  | -2.88354 | 1.58813  | H | -5.50213 | -1.80756 | -2.90069 |
| C                 | 2.37961  | -3.19797 | -0.79947 | H | -4.88154 | -1.12579 | -1.35331 |
| C                 | 3.79879  | -3.29408 | 1.60823  | H | -4.74547 | -0.17850 | -2.87300 |
| H                 | 2.00307  | -2.62089 | 2.53937  | H | -1.30379 | -0.60826 | -2.74680 |
| C                 | 3.70538  | -3.60920 | -0.79777 | H | -3.81843 | 0.09882  | 0.99606  |
| H                 | 1.85977  | -3.14171 | -1.75641 | O | -4.13522 | -2.09594 | 2.60992  |
| C                 | 4.43384  | -3.64292 | 0.40531  | C | -5.15790 | -1.11868 | 2.76193  |
| H                 | 4.33389  | -3.32729 | 2.55657  | H | -5.83783 | -1.50651 | 3.53084  |
| H                 | 4.20812  | -3.88369 | -1.72670 | H | -4.74365 | -0.15207 | 3.09445  |
| O                 | 5.73798  | -4.00614 | 0.30984  | H | -5.71422 | -0.97242 | 1.82085  |
| C                 | 6.54372  | -3.94604 | 1.48706  | H | 0.44916  | -0.36073 | -1.07120 |
| H                 | 6.19455  | -4.66859 | 2.24184  | O | 1.05040  | -2.36065 | -1.07673 |
| H                 | 7.55974  | -4.20882 | 1.16919  | C | 2.09178  | 2.04912  | -0.29503 |
| H                 | 6.53854  | -2.93100 | 1.91456  | C | 1.09646  | 3.01637  | -0.42395 |
|                   |          |          |          | C | -0.08586 | 2.91040  | 0.34158  |
|                   |          |          |          | C | -0.20238 | 1.83663  | 1.24931  |
|                   |          |          |          | C | 0.80863  | 0.88223  | 1.32271  |
|                   |          |          |          | N | 1.90080  | 1.00647  | 0.53986  |
|                   |          |          |          | H | 1.22248  | 3.83262  | -1.13365 |
| <b>I-[Rh]-TS1</b> |          |          |          |   |          |          |          |
| O                 | 3.05722  | -1.39304 | -2.21738 |   |          |          |          |
| H                 | 2.81022  | -0.45778 | -2.28630 |   |          |          |          |
| H                 | 2.20648  | -1.82867 | -1.75934 |   |          |          |          |

|                   |          |          |          |   |          |          |          |
|-------------------|----------|----------|----------|---|----------|----------|----------|
| H                 | -1.07813 | 1.74336  | 1.88897  | C | 0.14444  | 1.68562  | -1.80094 |
| Rh                | 3.25726  | -0.40141 | 0.63643  | C | -0.61038 | 1.40564  | -0.65674 |
| C                 | 3.39447  | 1.99476  | -0.98837 | C | 0.07872  | 1.13800  | 0.53788  |
| C                 | 3.83959  | 2.95504  | -1.89973 | C | 1.46701  | 1.16524  | 0.59425  |
| C                 | 5.09740  | 2.81022  | -2.48735 | C | 2.21245  | 1.44258  | -0.56504 |
| C                 | 5.88544  | 1.70848  | -2.15043 | H | -0.36656 | 1.88297  | -2.74769 |
| C                 | 5.38725  | 0.78061  | -1.23756 | H | -0.49142 | 0.89554  | 1.43498  |
| N                 | 4.18022  | 0.91804  | -0.67272 | H | 1.99788  | 0.95174  | 1.52375  |
| H                 | 5.45613  | 3.55383  | -3.20062 | C | -2.13587 | 1.40424  | -0.69693 |
| H                 | 3.20756  | 3.80802  | -2.14484 | C | -2.73105 | 2.81699  | -0.59076 |
| H                 | 6.87401  | 1.55817  | -2.58501 | H | -3.82192 | 2.73175  | -0.69284 |
| H                 | 5.96248  | -0.09927 | -0.94717 | O | -2.55991 | 3.46849  | 0.68188  |
| C                 | 1.98419  | -2.31811 | 2.63082  | C | -1.31144 | 3.79856  | 1.15283  |
| C                 | 1.03142  | -2.68832 | 3.57968  | C | -1.04834 | 3.50688  | 2.49448  |
| C                 | -0.04132 | -1.83079 | 3.83085  | C | -0.32639 | 4.46708  | 0.38255  |
| C                 | -0.14438 | -0.63773 | 3.11427  | C | 0.18635  | 3.81562  | 3.07483  |
| C                 | 0.82871  | -0.32840 | 2.16372  | H | -1.82974 | 2.99804  | 3.06272  |
| N                 | 1.89137  | -1.16679 | 1.95405  | C | 0.91911  | 4.74938  | 0.96075  |
| H                 | -0.80082 | -2.09057 | 4.56941  | C | 1.17585  | 4.42353  | 2.29913  |
| H                 | 2.85152  | -2.93816 | 2.39943  | H | 0.37388  | 3.56528  | 4.12107  |
| H                 | 1.14105  | -3.63483 | 4.10948  | H | 1.69242  | 5.23877  | 0.36852  |
| H                 | -0.98049 | 0.04155  | 3.27575  | H | 2.15268  | 4.65719  | 2.72807  |
| O                 | 4.55569  | -1.91043 | 0.85008  | O | -0.65485 | 4.79398  | -0.89895 |
| H                 | 5.34637  | -1.71897 | 0.32016  | C | 0.35498  | 5.35252  | -1.73410 |
| O                 | 4.06900  | 0.53653  | 2.14432  | H | 0.68446  | 6.33381  | -1.35564 |
| H                 | 4.70129  | -0.15174 | 2.43043  | H | 1.22118  | 4.67605  | -1.81452 |
| C                 | -1.18374 | 3.88382  | 0.18676  | H | -0.10742 | 5.47670  | -2.72087 |
| C                 | -2.51552 | 3.51556  | 0.45722  | H | -2.33964 | 3.44540  | -1.40154 |
| C                 | -0.94123 | 5.20409  | -0.25283 | H | 2.10306  | 1.90902  | -2.68687 |
| C                 | -3.57097 | 4.41416  | 0.29783  | O | 3.57212  | 1.41492  | -0.42384 |
| H                 | -2.74700 | 2.49703  | 0.77461  | C | 4.37288  | 1.49904  | -1.59698 |
| C                 | -1.98037 | 6.11208  | -0.40694 | H | 5.41117  | 1.37338  | -1.26540 |
| H                 | 0.07945  | 5.53473  | -0.45417 | H | 4.11571  | 0.69907  | -2.31049 |
| C                 | -3.30663 | 5.72479  | -0.13494 | H | 4.26118  | 2.47947  | -2.08916 |
| H                 | -4.58897 | 4.08445  | 0.50364  | H | -2.42606 | 1.11567  | -1.72865 |
| H                 | -1.78814 | 7.13587  | -0.73292 | O | -2.71326 | 0.57066  | 0.26425  |
| O                 | -4.25842 | 6.67507  | -0.31741 | C | -0.17627 | -1.67891 | -1.21402 |
| C                 | -5.61784 | 6.33785  | -0.04231 | C | 1.21105  | -1.79168 | -1.21798 |
| H                 | -5.74799 | 6.05123  | 1.01360  | C | 1.90025  | -1.98117 | -0.00039 |
| H                 | -6.19942 | 7.24355  | -0.25205 | C | 1.14661  | -2.10804 | 1.18559  |
| H                 | -5.96216 | 5.51913  | -0.69427 | C | -0.23996 | -1.96663 | 1.13887  |
|                   |          |          |          | N | -0.84615 | -1.74825 | -0.04473 |
| <b>I-[Rh]-IM2</b> |          |          |          | H | 1.75872  | -1.67522 | -2.15165 |
| C                 | 1.54675  | 1.70396  | -1.77191 | H | 1.64039  | -2.28376 | 2.14006  |

|                   |          |          |          |   |          |          |          |
|-------------------|----------|----------|----------|---|----------|----------|----------|
| Rh                | -2.77018 | -1.45246 | -0.06881 | C | 3.83085  | -2.93799 | 0.93346  |
| C                 | -1.06073 | -1.42370 | -2.36884 | C | 2.66215  | -2.21546 | 1.20163  |
| C                 | -0.62294 | -1.29434 | -3.68864 | C | 2.69607  | -0.87244 | 1.59318  |
| C                 | -1.55457 | -1.03808 | -4.69622 | C | 3.95358  | -0.25745 | 1.72177  |
| C                 | -2.90644 | -0.91634 | -4.36521 | C | 5.13127  | -0.95193 | 1.44230  |
| C                 | -3.28573 | -1.04849 | -3.03091 | C | 5.07444  | -2.29719 | 1.03803  |
| N                 | -2.38943 | -1.29304 | -2.06419 | H | 1.68771  | -2.69075 | 1.06819  |
| H                 | -1.22449 | -0.93344 | -5.73095 | H | 4.01084  | 0.79517  | 2.01307  |
| H                 | 0.43760  | -1.38854 | -3.92014 | H | 6.10686  | -0.46565 | 1.51490  |
| H                 | -3.66341 | -0.71586 | -5.12389 | C | 1.37747  | -0.11197 | 1.80911  |
| H                 | -4.32002 | -0.94541 | -2.69815 | C | 1.04191  | -0.12971 | 3.31282  |
| C                 | -3.43045 | -1.62853 | 2.89024  | H | 1.89706  | 0.19051  | 3.92683  |
| C                 | -3.12358 | -1.79421 | 4.24029  | O | 0.01106  | 0.82352  | 3.65944  |
| C                 | -1.79929 | -2.05053 | 4.60272  | C | -1.21198 | 0.85238  | 3.04030  |
| C                 | -0.81911 | -2.12784 | 3.61074  | C | -1.70369 | 2.11227  | 2.67933  |
| C                 | -1.18415 | -1.94997 | 2.27446  | C | -2.03809 | -0.28457 | 2.85257  |
| N                 | -2.49019 | -1.70872 | 1.93962  | C | -2.98523 | 2.26400  | 2.13337  |
| H                 | -1.52677 | -2.18613 | 5.65060  | H | -1.04789 | 2.97378  | 2.82432  |
| H                 | -4.44263 | -1.42685 | 2.53430  | C | -3.29705 | -0.13342 | 2.26040  |
| H                 | -3.91525 | -1.72159 | 4.98668  | C | -3.77914 | 1.13746  | 1.91375  |
| H                 | 0.22240  | -2.31909 | 3.86909  | H | -3.34484 | 3.25942  | 1.86587  |
| O                 | -4.78332 | -1.16708 | -0.10716 | H | -3.91705 | -1.01348 | 2.08328  |
| H                 | -4.78435 | -0.19836 | 0.00240  | H | -4.77126 | 1.23156  | 1.46691  |
| O                 | -3.06203 | -3.45240 | -0.26683 | O | -1.55002 | -1.49143 | 3.26861  |
| H                 | -3.60448 | -3.52592 | -1.07034 | C | -1.96278 | -2.64659 | 2.54043  |
| C                 | 3.37521  | -1.94958 | 0.02512  | H | -3.01842 | -2.89749 | 2.73294  |
| C                 | 4.06607  | -1.49492 | 1.16356  | H | -1.80434 | -2.49390 | 1.46139  |
| C                 | 4.13698  | -2.28164 | -1.11676 | H | -1.32899 | -3.47052 | 2.89277  |
| C                 | 5.45443  | -1.35630 | 1.17202  | H | 0.74118  | -1.14688 | 3.60666  |
| H                 | 3.51238  | -1.19821 | 2.05600  | H | 3.76095  | -3.97850 | 0.61496  |
| C                 | 5.52018  | -2.15875 | -1.12073 | O | 6.27395  | -2.89399 | 0.74692  |
| H                 | 3.64150  | -2.65662 | -2.01392 | C | 6.25465  | -4.24814 | 0.30956  |
| C                 | 6.19161  | -1.68459 | 0.02201  | H | 7.30100  | -4.52285 | 0.12596  |
| H                 | 5.94829  | -0.97773 | 2.06651  | H | 5.83242  | -4.91303 | 1.08144  |
| H                 | 6.10540  | -2.42299 | -2.00332 | H | 5.67781  | -4.36009 | -0.62363 |
| O                 | 7.54175  | -1.57462 | -0.07691 | O | 0.35393  | -0.58712 | 1.04612  |
| C                 | 8.26924  | -1.10373 | 1.05699  | H | 1.62946  | 0.96903  | 1.59014  |
| H                 | 8.13339  | -1.77432 | 1.92063  | C | -3.74858 | -0.98411 | -1.31156 |
| H                 | 9.32388  | -1.10055 | 0.75650  | C | -4.93978 | -0.25388 | -1.47668 |
| H                 | 7.96009  | -0.08165 | 1.32883  | C | -3.85405 | -2.34149 | -0.93450 |
|                   |          |          |          | C | -6.19142 | -0.83832 | -1.27831 |
|                   |          |          |          | H | -4.89986 | 0.79225  | -1.78597 |
| <b>I-[Rh]-TS2</b> |          |          |          | C | -5.09205 | -2.93420 | -0.72307 |
| O                 | 3.58032  | 2.32767  | -0.39816 | H | -2.95289 | -2.93383 | -0.76669 |
| H                 | 4.23306  | 1.61000  | -0.34370 |   |          |          |          |







|                   |          |          |          |    |          |          |          |
|-------------------|----------|----------|----------|----|----------|----------|----------|
| H                 | 1.49132  | 1.31453  | 0.49822  | N  | 0.73160  | 0.07390  | -0.74925 |
| C                 | 4.37485  | -3.14660 | 1.01687  | H  | -1.88673 | -2.00773 | -1.01639 |
| C                 | 3.62251  | -2.56900 | 2.04052  | H  | -1.76308 | 2.31402  | -0.70737 |
| C                 | 3.58682  | -1.17950 | 2.24073  | Rh | 2.65206  | -0.00219 | -0.42671 |
| C                 | 4.35510  | -0.36673 | 1.37853  | C  | 0.93942  | -2.27126 | -0.84574 |
| C                 | 5.11973  | -0.92498 | 0.36233  | C  | 0.48967  | -3.58673 | -0.97525 |
| C                 | 5.12681  | -2.31913 | 0.16575  | C  | 1.40768  | -4.63354 | -0.88117 |
| H                 | 3.02581  | -3.20409 | 2.69773  | C  | 2.75572  | -4.34261 | -0.65906 |
| H                 | 4.34258  | 0.71928  | 1.48077  | C  | 3.14692  | -3.00903 | -0.54874 |
| H                 | 5.70516  | -0.29643 | -0.31105 | N  | 2.26706  | -2.00361 | -0.64775 |
| C                 | 2.67668  | -0.63019 | 3.28858  | H  | 1.07031  | -5.66701 | -0.97423 |
| C                 | 2.57199  | 0.79104  | 3.43746  | H  | -0.57005 | -3.78483 | -1.13352 |
| H                 | 3.35500  | 1.46622  | 3.09866  | H  | 3.50258  | -5.13203 | -0.56997 |
| O                 | 1.49413  | 1.11876  | 1.67052  | H  | 4.18407  | -2.72368 | -0.36734 |
| C                 | 0.17653  | 0.84651  | 2.00234  | C  | 3.32073  | 2.95023  | -0.12064 |
| C                 | -0.63649 | 1.83008  | 2.56669  | C  | 3.01620  | 4.31076  | -0.08304 |
| C                 | -0.33403 | -0.45220 | 1.76798  | C  | 1.69285  | 4.71032  | -0.27931 |
| C                 | -1.95674 | 1.53445  | 2.92387  | C  | 0.71156  | 3.74186  | -0.50180 |
| H                 | -0.21525 | 2.82631  | 2.71631  | C  | 1.07458  | 2.39405  | -0.52063 |
| C                 | -1.65156 | -0.75105 | 2.14096  | N  | 2.37875  | 2.02261  | -0.33230 |
| C                 | -2.45403 | 0.24420  | 2.71236  | H  | 1.42261  | 5.76727  | -0.25980 |
| H                 | -2.59110 | 2.30783  | 3.36105  | H  | 4.33518  | 2.57348  | 0.01882  |
| H                 | -2.06215 | -1.74596 | 1.96863  | H  | 3.81087  | 5.03594  | 0.09449  |
| H                 | -3.48330 | 0.00177  | 2.98597  | H  | -0.32887 | 4.02749  | -0.65479 |
| O                 | 0.51121  | -1.31842 | 1.16045  | O  | 4.64593  | 0.00236  | -0.06772 |
| C                 | 0.14940  | -2.69421 | 1.10398  | H  | 5.02526  | -0.69422 | -0.62996 |
| H                 | -0.00496 | -3.09056 | 2.12023  | O  | 3.07441  | 0.16031  | -2.39030 |
| H                 | -0.76137 | -2.84508 | 0.50298  | H  | 4.04750  | 0.15751  | -2.33631 |
| H                 | 0.99252  | -3.20769 | 0.62830  | O  | 2.35502  | -0.20635 | 1.64786  |
| H                 | 1.87623  | 1.16536  | 4.19019  | C  | 1.16188  | -0.66637 | 2.03362  |
| H                 | 4.36652  | -4.22834 | 0.88437  | C  | 0.88681  | -2.04062 | 2.17008  |
| O                 | 5.87407  | -2.77265 | -0.87464 | C  | 0.09872  | 0.24462  | 2.32600  |
| C                 | 5.83948  | -4.16684 | -1.17674 | C  | -0.39213 | -2.50782 | 2.50525  |
| H                 | 6.47136  | -4.29778 | -2.06332 | H  | 1.70153  | -2.74273 | 1.97656  |
| H                 | 6.24538  | -4.76235 | -0.34342 | C  | -1.17924 | -0.21865 | 2.65125  |
| H                 | 4.81220  | -4.49574 | -1.40197 | C  | -1.42962 | -1.59972 | 2.72618  |
| O                 | 1.95128  | -1.40612 | 3.96706  | H  | -0.57337 | -3.58293 | 2.57876  |
|                   |          |          |          | H  | -1.98865 | 0.48759  | 2.84020  |
|                   |          |          |          | H  | -2.43475 | -1.95003 | 2.97183  |
|                   |          |          |          | O  | 0.43688  | 1.56642  | 2.24610  |
|                   |          |          |          | C  | -0.56631 | 2.53337  | 2.52214  |
|                   |          |          |          | H  | -0.95141 | 2.42275  | 3.54953  |
|                   |          |          |          | H  | -0.08350 | 3.51250  | 2.41649  |
|                   |          |          |          | H  | -1.40508 | 2.45688  | 1.81010  |
| <b>I-[Rh]-IM4</b> |          |          |          |    |          |          |          |
| C                 | 0.05571  | -1.08916 | -0.86379 |    |          |          |          |
| C                 | -1.33540 | -1.07337 | -0.92410 |    |          |          |          |
| C                 | -2.01991 | 0.15952  | -0.85428 |    |          |          |          |
| C                 | -1.26458 | 1.34841  | -0.77610 |    |          |          |          |
| C                 | 0.12656  | 1.27873  | -0.71235 |    |          |          |          |

|                   |          |          |          |                    |          |          |          |
|-------------------|----------|----------|----------|--------------------|----------|----------|----------|
| C                 | -3.49433 | 0.20168  | -0.81179 | H                  | 3.79031  | 5.07453  | -0.15837 |
| C                 | -4.22362 | -0.84320 | -0.21462 | H                  | -0.36313 | 3.92954  | -0.55525 |
| C                 | -4.21483 | 1.29932  | -1.33118 | O                  | 4.76945  | 0.17670  | -0.44628 |
| C                 | -5.61639 | -0.80739 | -0.12924 | H                  | 5.17254  | -0.68427 | -0.64731 |
| H                 | -3.69567 | -1.69139 | 0.22618  | O                  | 2.76655  | 0.11626  | -2.51845 |
| C                 | -5.60135 | 1.34360  | -1.26252 | H                  | 3.70452  | 0.33551  | -2.67670 |
| H                 | -3.68395 | 2.12011  | -1.81759 | O                  | 3.70157  | -0.72867 | 1.88546  |
| C                 | -6.31512 | 0.29147  | -0.65746 | H                  | 4.27463  | -0.25750 | 1.23222  |
| H                 | -6.14356 | -1.62814 | 0.35641  | H                  | 2.91868  | -0.11526 | 2.08970  |
| H                 | -6.15789 | 2.18624  | -1.67684 | O                  | 1.56180  | 0.69398  | 2.30537  |
| O                 | -7.66660 | 0.42368  | -0.62679 | C                  | 0.50127  | -0.06541 | 2.37224  |
| C                 | -8.43722 | -0.61433 | -0.02236 | C                  | 0.53888  | -1.48368 | 2.43072  |
| H                 | -8.17600 | -0.73232 | 1.04162  | C                  | -0.81208 | 0.52823  | 2.36684  |
| H                 | -9.48438 | -0.30093 | -0.11096 | C                  | -0.62749 | -2.25978 | 2.48776  |
| H                 | -8.29247 | -1.57184 | -0.54795 | H                  | 1.51928  | -1.96548 | 2.42184  |
|                   |          |          |          | C                  | -1.96907 | -0.24469 | 2.43415  |
|                   |          |          |          | C                  | -1.88400 | -1.65115 | 2.48722  |
| <b>I-[Rh]-TS4</b> |          |          |          | H                  | -0.54414 | -3.34988 | 2.52399  |
| C                 | 0.14483  | -1.16762 | -0.75501 | H                  | -2.95011 | 0.23323  | 2.42373  |
| C                 | -1.24460 | -1.17768 | -0.85664 | H                  | -2.79860 | -2.24665 | 2.53379  |
| C                 | -1.94894 | 0.04571  | -0.87920 | O                  | -0.80413 | 1.90190  | 2.27863  |
| C                 | -1.21095 | 1.24671  | -0.83371 | C                  | -2.05673 | 2.56404  | 2.21826  |
| C                 | 0.17696  | 1.20220  | -0.71587 | H                  | -2.62996 | 2.42351  | 3.15110  |
| N                 | 0.79907  | 0.00763  | -0.67955 | H                  | -1.83592 | 3.63098  | 2.08426  |
| H                 | -1.77612 | -2.12466 | -0.92799 | H                  | -2.66527 | 2.20742  | 1.36969  |
| H                 | -1.71987 | 2.20874  | -0.84415 | C                  | -3.42382 | 0.06899  | -0.90797 |
| Rh                | 2.75267  | 0.00097  | -0.56248 | C                  | -4.17077 | -1.01168 | -0.40266 |
| C                 | 1.04968  | -2.33247 | -0.71240 | C                  | -4.13399 | 1.18563  | -1.40151 |
| C                 | 0.61453  | -3.65954 | -0.69628 | C                  | -5.56578 | -0.99193 | -0.37812 |
| C                 | 1.55684  | -4.68607 | -0.62117 | H                  | -3.65794 | -1.87994 | 0.01402  |
| C                 | 2.91479  | -4.36452 | -0.56709 | C                  | -5.52227 | 1.21635  | -1.39253 |
| C                 | 3.28901  | -3.02229 | -0.59150 | H                  | -3.59385 | 2.03661  | -1.81995 |
| N                 | 2.38466  | -2.03639 | -0.66783 | C                  | -6.25220 | 0.12839  | -0.87650 |
| H                 | 1.23085  | -5.72711 | -0.60078 | H                  | -6.10488 | -1.84334 | 0.03652  |
| H                 | -0.45173 | -3.88106 | -0.72698 | H                  | -6.06761 | 2.07612  | -1.78591 |
| H                 | 3.68251  | -5.13610 | -0.50356 | O                  | -7.60445 | 0.24801  | -0.89950 |
| H                 | 4.33566  | -2.71978 | -0.54708 | C                  | -8.39053 | -0.82769 | -0.38765 |
| C                 | 3.35337  | 2.97491  | -0.34709 | H                  | -8.17537 | -1.00191 | 0.67884  |
| C                 | 3.00826  | 4.32405  | -0.27616 | H                  | -9.43586 | -0.51802 | -0.50575 |
| C                 | 1.65989  | 4.67835  | -0.35313 | H                  | -8.21288 | -1.75368 | -0.95764 |
| C                 | 0.69601  | 3.67941  | -0.50292 |                    |          |          |          |
| C                 | 1.09956  | 2.34484  | -0.57399 |                    |          |          |          |
| N                 | 2.42639  | 2.01946  | -0.49007 | <b>II-[Rh]-IM1</b> |          |          |          |
| H                 | 1.35626  | 5.72474  | -0.29480 | C                  | 5.13967  | -0.84915 | -0.13685 |
| H                 | 4.38661  | 2.63027  | -0.28389 | C                  | 5.43366  | -2.06526 | 0.50768  |

|    |          |          |          |   |          |          |          |
|----|----------|----------|----------|---|----------|----------|----------|
| C  | 6.21111  | 0.02952  | -0.41050 | H | -1.16508 | 0.99143  | -3.78011 |
| C  | 6.73823  | -2.40506 | 0.86938  | H | -2.90635 | 1.77948  | -1.42949 |
| H  | 4.62718  | -2.75658 | 0.76054  | O | -3.33898 | 3.01344  | -0.50535 |
| C  | 7.51521  | -0.29934 | -0.06511 | H | -4.29228 | 2.84291  | -0.42532 |
| H  | 6.02446  | 0.97318  | -0.92689 | H | -3.00936 | 0.32533  | 3.44737  |
| C  | 7.79099  | -1.52054 | 0.57909  | C | -6.59075 | -1.56135 | 2.37942  |
| H  | 6.92289  | -3.35003 | 1.37979  | C | -5.44187 | -0.78512 | 2.53546  |
| H  | 8.34371  | 0.37383  | -0.29266 | C | -4.72836 | -0.32300 | 1.41992  |
| O  | 9.09334  | -1.75803 | 0.88052  | C | -5.20660 | -0.64683 | 0.14111  |
| C  | 9.43010  | -2.98909 | 1.51901  | C | -6.35589 | -1.42342 | -0.03400 |
| H  | 10.51760 | -2.96678 | 1.65841  | C | -7.05261 | -1.88922 | 1.09397  |
| H  | 8.93433  | -3.07552 | 2.49916  | H | -5.10078 | -0.52699 | 3.54034  |
| H  | 9.15635  | -3.84972 | 0.88783  | H | -4.66796 | -0.27702 | -0.73637 |
| C  | 2.01488  | 1.15049  | -0.86472 | H | -6.70051 | -1.65300 | -1.04240 |
| C  | 3.33567  | 0.84791  | -0.53747 | C | -3.46179 | 0.50650  | 1.55344  |
| C  | 3.75382  | -0.49938 | -0.50427 | C | -2.25701 | -0.32342 | 1.11079  |
| C  | 2.81121  | -1.50623 | -0.80586 | H | -2.52387 | -0.97542 | 0.27511  |
| C  | 1.49847  | -1.15129 | -1.10793 | O | -1.17066 | 0.48953  | 0.60098  |
| N  | 1.15136  | 0.15156  | -1.13135 | C | -0.43100 | 1.26399  | 1.48876  |
| H  | 4.03022  | 1.64723  | -0.28420 | C | -0.75110 | 2.60673  | 1.66957  |
| H  | 3.10557  | -2.55445 | -0.80815 | C | 0.69359  | 0.67989  | 2.10516  |
| Rh | -0.71663 | 0.60798  | -1.52117 | C | 0.07919  | 3.41001  | 2.45786  |
| C  | 1.38955  | 2.48650  | -0.94310 | H | -1.63938 | 2.99760  | 1.16481  |
| C  | 2.06865  | 3.67907  | -0.69210 | C | 1.51940  | 1.49319  | 2.89688  |
| C  | 1.38041  | 4.89096  | -0.78887 | C | 1.21152  | 2.84936  | 3.05895  |
| C  | 0.02783  | 4.87950  | -1.12725 | H | -0.15432 | 4.46758  | 2.59370  |
| C  | -0.60653 | 3.65707  | -1.35721 | H | 2.40447  | 1.07571  | 3.37679  |
| N  | 0.05791  | 2.49642  | -1.27082 | H | 1.87043  | 3.47060  | 3.66966  |
| H  | 1.89938  | 5.83067  | -0.59314 | O | 0.89845  | -0.63925 | 1.86638  |
| H  | 3.12403  | 3.65751  | -0.42254 | C | 2.01033  | -1.27639 | 2.49506  |
| H  | -0.54924 | 5.80197  | -1.19859 | H | 2.95803  | -0.79435 | 2.21183  |
| H  | -1.68399 | 3.58144  | -1.53729 | H | 1.89753  | -1.26079 | 3.59096  |
| C  | -1.91211 | -2.15761 | -1.96773 | H | 2.00236  | -2.31218 | 2.13639  |
| C  | -1.87844 | -3.55038 | -2.01582 | H | -1.87104 | -0.93988 | 1.93887  |
| C  | -0.67464 | -4.20314 | -1.74336 | H | -7.14784 | -1.92290 | 3.24637  |
| C  | 0.46144  | -3.44910 | -1.44140 | O | -8.18316 | -2.65523 | 1.03418  |
| C  | 0.36999  | -2.05580 | -1.41089 | C | -8.68346 | -3.01355 | -0.25025 |
| N  | -0.82381 | -1.43640 | -1.66691 | H | -9.57806 | -3.62167 | -0.06725 |
| H  | -0.61506 | -5.29235 | -1.76815 | H | -8.96054 | -2.12070 | -0.83471 |
| H  | -2.81927 | -1.58454 | -2.16778 | H | -7.94567 | -3.60723 | -0.81507 |
| H  | -2.78554 | -4.10321 | -2.26166 | O | -3.27993 | 1.04916  | 2.85615  |
| H  | 1.41282  | -3.93729 | -1.23119 | H | -3.52618 | 1.37229  | 0.86682  |
| O  | -2.62068 | 0.98235  | -2.00625 |   |          |          |          |
| O  | -0.29282 | 0.70942  | -3.44494 |   |          |          |          |

**II-[Rh]-TS1**

|    |          |          |          |   |           |          |          |
|----|----------|----------|----------|---|-----------|----------|----------|
| C  | 5.15819  | -0.43588 | -0.19104 | O | -2.71020  | 1.19320  | -1.79176 |
| C  | 5.49957  | -1.72452 | 0.26045  | O | -0.41968  | 1.35082  | -3.34835 |
| C  | 6.17605  | 0.54281  | -0.22619 | H | -1.30952  | 1.66329  | -3.59631 |
| C  | 6.79744  | -2.03781 | 0.66738  | H | -3.00701  | 1.67833  | -0.97870 |
| H  | 4.73263  | -2.49894 | 0.32990  | O | -3.48687  | 2.46260  | 0.56609  |
| C  | 7.47394  | 0.24271  | 0.16532  | H | -4.44546  | 2.54481  | 0.43038  |
| H  | 5.95552  | 1.54830  | -0.58991 | H | -2.90212  | -0.73525 | 3.49167  |
| C  | 7.79659  | -1.05059 | 0.61915  | C | -6.86515  | -1.23128 | 2.36994  |
| H  | 7.01624  | -3.04305 | 1.02678  | C | -5.56326  | -0.77593 | 2.58717  |
| H  | 8.26204  | 0.99674  | 0.12334  | C | -4.68960  | -0.47289 | 1.51492  |
| O  | 9.08761  | -1.25004 | 0.98824  | C | -5.21879  | -0.62820 | 0.20956  |
| C  | 9.47208  | -2.54314 | 1.45413  | C | -6.51878  | -1.08816 | -0.01921 |
| H  | 10.54083 | -2.47125 | 1.68900  | C | -7.35439  | -1.40024 | 1.06631  |
| H  | 8.91249  | -2.81893 | 2.36234  | H | -5.20679  | -0.64446 | 3.61104  |
| H  | 9.31574  | -3.30684 | 0.67553  | H | -4.60013  | -0.35668 | -0.65026 |
| C  | 1.93407  | 1.45788  | -0.72609 | H | -6.87279  | -1.19000 | -1.04619 |
| C  | 3.26148  | 1.19007  | -0.40224 | C | -3.33086  | 0.06627  | 1.73717  |
| C  | 3.77391  | -0.11268 | -0.58712 | C | -2.27928  | -0.64328 | 0.96025  |
| C  | 2.92437  | -1.10222 | -1.12712 | H | -2.64436  | -1.01050 | -0.00318 |
| C  | 1.59669  | -0.78774 | -1.41448 | O | -1.13616  | 0.25636  | 0.58006  |
| N  | 1.15300  | 0.46643  | -1.20365 | C | -0.12915  | 0.43990  | 1.50989  |
| H  | 3.88409  | 1.97193  | 0.02945  | C | 0.02685   | 1.68429  | 2.11563  |
| H  | 3.29745  | -2.10810 | -1.31361 | C | 0.78478   | -0.60838 | 1.76481  |
| Rh | -0.75495 | 0.83203  | -1.46760 | C | 1.12113   | 1.92134  | 2.95639  |
| C  | 1.21161  | 2.73643  | -0.56967 | H | -0.70814  | 2.46145  | 1.90231  |
| C  | 1.80359  | 3.92206  | -0.13141 | C | 1.87550   | -0.36645 | 2.61080  |
| C  | 1.01960  | 5.07031  | -0.00525 | C | 2.04352   | 0.89827  | 3.19014  |
| C  | -0.33688 | 5.01017  | -0.32826 | H | 1.25066   | 2.90237  | 3.41686  |
| C  | -0.87285 | 3.79933  | -0.76570 | H | 2.60387   | -1.15372 | 2.80465  |
| N  | -0.12225 | 2.69544  | -0.87549 | H | 2.90659   | 1.07451  | 3.83573  |
| H  | 1.46822  | 6.00246  | 0.34163  | O | 0.53886   | -1.78752 | 1.14078  |
| H  | 2.86525  | 3.94277  | 0.11189  | C | 1.41427   | -2.88395 | 1.39373  |
| H  | -0.98338 | 5.88398  | -0.24321 | H | 2.44601   | -2.64696 | 1.08955  |
| H  | -1.92779 | 3.68514  | -1.01301 | H | 1.39688   | -3.15697 | 2.46063  |
| C  | -1.74527 | -1.88938 | -2.41296 | H | 1.03248   | -3.71642 | 0.79150  |
| C  | -1.60068 | -3.23992 | -2.72843 | H | -1.80352  | -1.47341 | 1.51048  |
| C  | -0.33831 | -3.82538 | -2.61742 | H | -7.52168  | -1.46552 | 3.21201  |
| C  | 0.74306  | -3.04686 | -2.19900 | O | -8.64837  | -1.86096 | 0.94569  |
| C  | 0.53828  | -1.70035 | -1.89460 | C | -9.15987  | -2.05013 | -0.36562 |
| N  | -0.70852 | -1.14551 | -2.00570 | H | -10.18439 | -2.42503 | -0.24398 |
| H  | -0.19188 | -4.88014 | -2.85528 | H | -9.18466  | -1.10298 | -0.93147 |
| H  | -2.70418 | -1.37357 | -2.48264 | H | -8.56601  | -2.79107 | -0.92816 |
| H  | -2.46935 | -3.81248 | -3.05445 | O | -2.96588  | 0.16922  | 3.12650  |
| H  | 1.73819  | -3.47987 | -2.10309 | H | -3.41026  | 1.46168  | 1.11677  |

| <b>I-[Rh]-TS3'</b> |          |          |          |    |          |          |          |
|--------------------|----------|----------|----------|----|----------|----------|----------|
| O                  | 4.93580  | -0.97615 | -1.33464 | C  | -4.03302 | -2.27884 | -3.04482 |
| H                  | 4.42513  | -1.49736 | -1.97661 | H  | -2.10873 | -1.65271 | -3.74682 |
| H                  | 2.39332  | 0.55495  | 0.94349  | C  | -4.15942 | -3.01136 | -0.73042 |
| C                  | -2.82513 | 2.53777  | 2.72106  | H  | -2.32954 | -2.92211 | 0.38039  |
| C                  | -1.52612 | 2.02355  | 2.72337  | C  | -4.78948 | -2.76693 | -1.96246 |
| C                  | -1.29132 | 0.63942  | 2.66396  | H  | -4.53381 | -2.10184 | -3.99841 |
| C                  | -2.40337 | -0.23033 | 2.65939  | H  | -4.72292 | -3.37602 | 0.12815  |
| C                  | -3.69691 | 0.26439  | 2.64809  | O  | -6.11282 | -2.96724 | -2.19740 |
| C                  | -3.91589 | 1.65804  | 2.65029  | C  | -6.92703 | -3.44435 | -1.12736 |
| H                  | -0.69433 | 2.72726  | 2.76345  | H  | -7.94233 | -3.52280 | -1.53439 |
| H                  | -2.22649 | -1.30619 | 2.62100  | H  | -6.58981 | -4.43558 | -0.78401 |
| H                  | -4.55991 | -0.40277 | 2.60438  | H  | -6.92190 | -2.73808 | -0.28143 |
| C                  | 0.05587  | 0.03466  | 2.52159  | C  | 1.46104  | -2.10958 | -0.20846 |
| C                  | 1.24421  | 0.87795  | 2.29712  | C  | 0.18148  | -2.58004 | -0.49802 |
| H                  | 2.16014  | 0.44386  | 2.70013  | C  | -0.60332 | -1.91568 | -1.46290 |
| H                  | 1.18568  | 1.96534  | 2.32645  | C  | -0.03704 | -0.82643 | -2.15586 |
| H                  | -2.97323 | 3.61666  | 2.74868  | C  | 1.23203  | -0.37301 | -1.80363 |
| O                  | -5.21128 | 2.05742  | 2.56872  | N  | 1.93949  | -1.02556 | -0.85620 |
| C                  | -5.48515 | 3.45670  | 2.49999  | H  | -0.21965 | -3.42963 | 0.05281  |
| H                  | -6.57395 | 3.54512  | 2.40387  | H  | -0.63171 | -0.26467 | -2.87444 |
| H                  | -5.15245 | 3.97081  | 3.41583  | Rh | 3.47559  | -0.11704 | -0.07387 |
| H                  | -4.99766 | 3.90955  | 1.62170  | C  | 2.36625  | -2.59209 | 0.85304  |
| O                  | 0.20681  | -1.19995 | 2.58486  | C  | 2.18288  | -3.77228 | 1.57604  |
| O                  | 0.32867  | 0.91391  | 0.35533  | C  | 3.08341  | -4.09750 | 2.59193  |
| C                  | -0.19272 | 2.05689  | -0.00136 | C  | 4.14813  | -3.23472 | 2.86434  |
| C                  | 0.56079  | 3.25861  | -0.02242 | C  | 4.28726  | -2.07584 | 2.10251  |
| C                  | -1.55905 | 2.11450  | -0.44905 | N  | 3.42429  | -1.76663 | 1.12367  |
| C                  | 0.00786  | 4.45623  | -0.47023 | H  | 2.95162  | -5.01597 | 3.16616  |
| H                  | 1.59659  | 3.21054  | 0.32019  | H  | 1.34120  | -4.42493 | 1.34513  |
| C                  | -2.09856 | 3.31847  | -0.91708 | H  | 4.86857  | -3.45034 | 3.65400  |
| C                  | -1.32057 | 4.48437  | -0.91961 | H  | 5.09778  | -1.36198 | 2.25907  |
| H                  | 0.60956  | 5.36782  | -0.47639 | C  | 3.54666  | 2.44825  | -1.72163 |
| H                  | -3.12995 | 3.35803  | -1.26893 | C  | 3.07899  | 3.32873  | -2.69533 |
| H                  | -1.76065 | 5.41794  | -1.27718 | C  | 1.95812  | 2.96969  | -3.44722 |
| O                  | -2.23200 | 0.94043  | -0.41837 | C  | 1.33845  | 1.74363  | -3.20072 |
| C                  | -3.58120 | 0.91096  | -0.87746 | C  | 1.85266  | 0.90083  | -2.21247 |
| H                  | -4.21131 | 1.60997  | -0.30525 | N  | 2.95697  | 1.26555  | -1.48806 |
| H                  | -3.63458 | 1.15454  | -1.95074 | H  | 1.56331  | 3.63868  | -4.21339 |
| H                  | -3.93194 | -0.11444 | -0.71368 | H  | 4.40808  | 2.68293  | -1.09455 |
| C                  | -2.02300 | -2.26597 | -1.66358 | H  | 3.58851  | 4.28044  | -2.84903 |
| C                  | -2.67529 | -2.02807 | -2.89228 | H  | 0.45662  | 1.44247  | -3.76560 |
| C                  | -2.79221 | -2.76292 | -0.59549 | O  | 4.97400  | 0.87399  | 0.88963  |
|                    |          |          |          | H  | 5.53866  | 1.22809  | 0.18237  |

|                      |          |          |          |                       |          |          |          |
|----------------------|----------|----------|----------|-----------------------|----------|----------|----------|
| <b>I-[Rh]-TS3-Cl</b> |          |          |          | H                     | 1.34683  | 4.54620  | -0.73578 |
| O                    | 2.91611  | 2.45137  | -1.09702 | H                     | -0.31130 | 6.37087  | -0.24652 |
| H                    | 3.53723  | 1.81068  | -0.71174 | H                     | -3.42159 | 3.36494  | -0.31758 |
| C                    | -4.22226 | -1.51437 | -0.57428 | H                     | 1.47118  | 1.24913  | 0.49689  |
| C                    | -5.46952 | -0.88634 | -0.74751 | C                     | 4.40987  | -3.33713 | 1.15603  |
| C                    | -4.21755 | -2.85249 | -0.12142 | C                     | 3.58535  | -2.69592 | 2.08082  |
| C                    | -6.66880 | -1.55208 | -0.48912 | C                     | 3.62789  | -1.30500 | 2.27406  |
| H                    | -5.51563 | 0.14089  | -1.11423 | C                     | 4.53732  | -0.55675 | 1.49377  |
| C                    | -5.40251 | -3.52628 | 0.14588  | C                     | 5.37626  | -1.18079 | 0.57900  |
| H                    | -3.27077 | -3.36809 | 0.05000  | C                     | 5.31712  | -2.57580 | 0.40054  |
| C                    | -6.64073 | -2.88223 | -0.03698 | H                     | 2.87929  | -3.27996 | 2.67381  |
| H                    | -7.61349 | -1.03255 | -0.64794 | H                     | 4.59231  | 0.52851  | 1.59099  |
| H                    | -5.39347 | -4.55564 | 0.50880  | H                     | 6.07542  | -0.60301 | -0.02826 |
| O                    | -7.74765 | -3.61671 | 0.24749  | C                     | 2.69099  | -0.69783 | 3.26544  |
| C                    | -9.02758 | -3.00529 | 0.09182  | C                     | 2.63310  | 0.72158  | 3.39520  |
| H                    | -9.19724 | -2.70226 | -0.95392 | H                     | 3.40261  | 1.38278  | 3.00259  |
| H                    | -9.76137 | -3.76884 | 0.37670  | H                     | 1.92307  | 1.13713  | 4.11209  |
| H                    | -9.13059 | -2.12955 | 0.75271  | H                     | 4.34063  | -4.41697 | 1.02686  |
| C                    | -0.58304 | -0.79044 | -1.31737 | O                     | 6.15172  | -3.09651 | -0.53729 |
| C                    | -1.77929 | -1.48904 | -1.16361 | C                     | 6.07959  | -4.49697 | -0.80335 |
| C                    | -2.95911 | -0.79382 | -0.82725 | H                     | 6.80650  | -4.68836 | -1.60171 |
| C                    | -2.89009 | 0.60810  | -0.67942 | H                     | 6.34896  | -5.08292 | 0.08997  |
| C                    | -1.67596 | 1.26530  | -0.86014 | H                     | 5.07162  | -4.78322 | -1.14420 |
| N                    | -0.56837 | 0.55433  | -1.17541 | O                     | 1.90560  | -1.43913 | 3.91927  |
| H                    | -1.79154 | -2.57118 | -1.28701 | O                     | 1.47733  | 0.92943  | 1.56008  |
| H                    | -3.77030 | 1.17415  | -0.37865 | C                     | 0.16813  | 0.70242  | 1.94550  |
| Rh                   | 1.13600  | 1.47998  | -1.25818 | C                     | -0.59610 | 1.78755  | 2.43291  |
| C                    | 0.75307  | -1.34939 | -1.59003 | C                     | -0.38215 | -0.57754 | 1.87524  |
| C                    | 1.00666  | -2.70085 | -1.83473 | C                     | -1.91935 | 1.56460  | 2.83811  |
| C                    | 2.31120  | -3.11509 | -2.11011 | C                     | -1.70373 | -0.79705 | 2.27841  |
| C                    | 3.33439  | -2.16563 | -2.13927 | C                     | -2.46369 | 0.27579  | 2.75320  |
| C                    | 3.02631  | -0.83428 | -1.86662 | H                     | -2.52857 | 2.38712  | 3.21279  |
| N                    | 1.77592  | -0.43407 | -1.59199 | H                     | -2.13924 | -1.79545 | 2.20805  |
| H                    | 2.52247  | -4.16730 | -2.30719 | H                     | -3.49957 | 0.11726  | 3.06127  |
| H                    | 0.18467  | -3.41632 | -1.82013 | H                     | 0.23960  | -1.38714 | 1.49019  |
| H                    | 4.36548  | -2.44384 | -2.35447 | O                     | 0.03776  | 2.98707  | 2.47234  |
| H                    | 3.78885  | -0.05479 | -1.86916 | C                     | -0.65752 | 4.09687  | 3.03889  |
| C                    | 0.27917  | 4.34050  | -0.64486 | H                     | 0.02280  | 4.95223  | 2.95231  |
| C                    | -0.64975 | 5.34180  | -0.37045 | H                     | -1.58652 | 4.30896  | 2.48896  |
| C                    | -1.99921 | 4.99803  | -0.25500 | H                     | -0.88824 | 3.90979  | 4.10009  |
| C                    | -2.37762 | 3.66385  | -0.40963 | Cl                    | 0.94412  | 1.89270  | -3.68128 |
| C                    | -1.40220 | 2.70340  | -0.68907 |                       |          |          |          |
| N                    | -0.08444 | 3.05986  | -0.81022 | <b>I-[Rh]-TS3-2Cl</b> |          |          |          |
| H                    | -2.75088 | 5.75887  | -0.03960 | C                     | -4.29344 | -1.49503 | -0.60820 |

|    |          |          |          |                    |          |          |          |
|----|----------|----------|----------|--------------------|----------|----------|----------|
| C  | -5.53979 | -0.86393 | -0.77706 | C                  | 4.25601  | -3.66047 | 1.02655  |
| C  | -4.29007 | -2.84903 | -0.20502 | C                  | 3.44542  | -3.01544 | 1.96054  |
| C  | -6.74030 | -1.54261 | -0.56294 | C                  | 3.54214  | -1.63393 | 2.19856  |
| H  | -5.58371 | 0.17573  | -1.10703 | C                  | 4.49358  | -0.89977 | 1.45589  |
| C  | -5.47637 | -3.53521 | 0.01993  | C                  | 5.32102  | -1.52945 | 0.53492  |
| H  | -3.34372 | -3.36702 | -0.03819 | C                  | 5.20553  | -2.91369 | 0.30897  |
| C  | -6.71395 | -2.88847 | -0.15910 | H                  | 2.70696  | -3.58787 | 2.52465  |
| H  | -7.68447 | -1.02113 | -0.71860 | H                  | 4.58698  | 0.17958  | 1.58211  |
| H  | -5.46959 | -4.57692 | 0.34560  | H                  | 6.05101  | -0.96167 | -0.04486 |
| O  | -7.82166 | -3.63644 | 0.08071  | C                  | 2.62294  | -1.02161 | 3.20188  |
| C  | -9.10214 | -3.02553 | -0.07372 | C                  | 2.61794  | 0.39428  | 3.37381  |
| H  | -9.25550 | -2.68448 | -1.11016 | H                  | 3.40432  | 1.03978  | 2.98873  |
| H  | -9.83637 | -3.80285 | 0.16964  | H                  | 1.92845  | 0.81459  | 4.10758  |
| H  | -9.22084 | -2.17573 | 0.61761  | H                  | 4.14323  | -4.73156 | 0.86039  |
| C  | -0.65040 | -0.74401 | -1.29506 | O                  | 6.02691  | -3.43638 | -0.63931 |
| C  | -1.84868 | -1.44569 | -1.18040 | C                  | 5.89390  | -4.82064 | -0.96138 |
| C  | -3.02888 | -0.76435 | -0.81751 | H                  | 6.62246  | -5.01454 | -1.75762 |
| C  | -2.96062 | 0.62975  | -0.60847 | H                  | 6.12317  | -5.45320 | -0.08898 |
| C  | -1.74519 | 1.29381  | -0.75033 | H                  | 4.87857  | -5.04502 | -1.32595 |
| N  | -0.63723 | 0.59141  | -1.08338 | O                  | 1.81109  | -1.75239 | 3.83606  |
| H  | -1.86241 | -2.52031 | -1.35736 | O                  | 1.42749  | 0.72947  | 1.57184  |
| H  | -3.84350 | 1.18434  | -0.29496 | C                  | 0.11418  | 0.57140  | 1.97869  |
| Rh | 1.05306  | 1.52547  | -1.16406 | C                  | -0.57677 | 1.68911  | 2.49888  |
| C  | 0.68623  | -1.28930 | -1.59018 | C                  | -0.50441 | -0.67563 | 1.90317  |
| C  | 0.94802  | -2.63057 | -1.87459 | C                  | -1.90396 | 1.53494  | 2.92216  |
| C  | 2.25785  | -3.02702 | -2.15385 | C                  | -1.82841 | -0.82757 | 2.32974  |
| C  | 3.27628  | -2.07245 | -2.14024 | C                  | -2.52005 | 0.27931  | 2.83017  |
| C  | 2.96041  | -0.75113 | -1.82723 | H                  | -2.45987 | 2.38397  | 3.31972  |
| N  | 1.70271  | -0.36889 | -1.56144 | H                  | -2.31930 | -1.79964 | 2.25508  |
| H  | 2.47732  | -4.07121 | -2.38202 | H                  | -3.55767 | 0.17402  | 3.15458  |
| H  | 0.13117  | -3.35197 | -1.88409 | H                  | 0.06432  | -1.51229 | 1.49534  |
| H  | 4.31041  | -2.34259 | -2.35182 | O                  | 0.12934  | 2.84669  | 2.54683  |
| H  | 3.71091  | 0.03949  | -1.77722 | C                  | -0.49505 | 3.99256  | 3.12476  |
| C  | 0.20480  | 4.36755  | -0.48316 | H                  | 0.23082  | 4.80866  | 3.03036  |
| C  | -0.72677 | 5.36256  | -0.19416 | H                  | -1.41790 | 4.25650  | 2.58742  |
| C  | -2.07474 | 5.01432  | -0.07671 | H                  | -0.72152 | 3.81557  | 4.18857  |
| C  | -2.45149 | 3.68106  | -0.24535 | Cl                 | 0.79035  | 2.01414  | -3.55720 |
| C  | -1.47471 | 2.72717  | -0.54065 | Cl                 | 3.17918  | 2.58884  | -0.90627 |
| N  | -0.15831 | 3.08824  | -0.66031 |                    |          |          |          |
| H  | -2.82736 | 5.77092  | 0.14994  |                    |          |          |          |
| H  | 1.27348  | 4.56855  | -0.57917 | <b>I-[Rh]-TS3a</b> |          |          |          |
| H  | -0.39063 | 6.39118  | -0.06042 | O                  | -3.30067 | 0.80012  | 1.89094  |
| H  | -3.49473 | 3.37950  | -0.15494 | H                  | -3.94288 | 0.29597  | 1.36433  |
| H  | 1.44013  | 1.26608  | 0.62459  | C                  | 4.35337  | -1.56306 | 0.11893  |
|    |          |          |          | C                  | 5.46485  | -0.86691 | 0.62864  |

|    |          |          |          |                    |          |          |          |
|----|----------|----------|----------|--------------------|----------|----------|----------|
| C  | 4.59903  | -2.64896 | -0.75023 | H                  | -1.55907 | 0.92352  | -0.60785 |
| C  | 6.77184  | -1.23074 | 0.30048  | C                  | -5.13601 | -1.93725 | -1.66456 |
| H  | 5.31542  | -0.03341 | 1.31778  | C                  | -3.77796 | -1.61951 | -1.55848 |
| C  | 5.89379  | -3.01845 | -1.09190 | C                  | -3.34360 | -0.35509 | -1.12834 |
| H  | 3.76255  | -3.19761 | -1.18735 | C                  | -4.32695 | 0.61199  | -0.82580 |
| C  | 6.99342  | -2.31334 | -0.56745 | C                  | -5.68128 | 0.31253  | -0.93032 |
| H  | 7.60546  | -0.67343 | 0.72716  | C                  | -6.09768 | -0.96813 | -1.34252 |
| H  | 6.07905  | -3.84961 | -1.77478 | H                  | -3.02538 | -2.37216 | -1.79989 |
| O  | 8.22295  | -2.74448 | -0.95269 | H                  | -4.02777 | 1.60960  | -0.50155 |
| C  | 9.36985  | -2.05624 | -0.45571 | H                  | -6.44072 | 1.06213  | -0.69880 |
| H  | 9.42381  | -2.11810 | 0.64314  | C                  | -1.87559 | -0.15398 | -0.96940 |
| H  | 10.23758 | -2.56308 | -0.89485 | C                  | -1.68191 | 1.82323  | -2.04507 |
| H  | 9.36334  | -0.99936 | -0.76731 | H                  | -2.74384 | 2.01335  | -2.21763 |
| C  | 0.61688  | -1.67862 | 0.71566  | O                  | -1.11643 | 2.96895  | -1.52683 |
| C  | 1.91915  | -2.09662 | 0.44171  | C                  | 0.21936  | 3.29679  | -1.55204 |
| C  | 2.97436  | -1.16029 | 0.46079  | C                  | 0.48686  | 4.63881  | -1.26106 |
| C  | 2.67925  | 0.18184  | 0.78677  | C                  | 1.29260  | 2.40841  | -1.81541 |
| C  | 1.36281  | 0.55263  | 1.04776  | C                  | 1.79601  | 5.12045  | -1.21409 |
| N  | 0.38417  | -0.37668 | 0.99089  | H                  | -0.36540 | 5.29276  | -1.06874 |
| H  | 2.11720  | -3.14718 | 0.23263  | C                  | 2.60467  | 2.90429  | -1.76573 |
| H  | 3.46526  | 0.93570  | 0.79384  | C                  | 2.85762  | 4.24638  | -1.46274 |
| Rh | -1.44312 | 0.16818  | 1.34714  | H                  | 1.97996  | 6.17131  | -0.98312 |
| C  | -0.59796 | -2.51000 | 0.80874  | H                  | 3.43611  | 2.22686  | -1.96066 |
| C  | -0.63228 | -3.88844 | 0.58314  | H                  | 3.88951  | 4.60183  | -1.42923 |
| C  | -1.83621 | -4.57790 | 0.73595  | O                  | 0.99524  | 1.11368  | -2.08690 |
| C  | -2.98155 | -3.87894 | 1.12654  | C                  | 2.00717  | 0.26727  | -2.62679 |
| C  | -2.88788 | -2.50543 | 1.34171  | H                  | 2.38187  | 0.67512  | -3.57953 |
| N  | -1.73455 | -1.84100 | 1.18571  | H                  | 2.84442  | 0.13594  | -1.92652 |
| H  | -1.87643 | -5.65324 | 0.55469  | H                  | 1.51962  | -0.69957 | -2.79609 |
| H  | 0.27676  | -4.41183 | 0.28720  | H                  | -1.13195 | 1.33543  | -2.85245 |
| H  | -3.94099 | -4.38011 | 1.25707  | H                  | -5.42965 | -2.93543 | -1.99008 |
| H  | -3.74777 | -1.90580 | 1.64332  | O                  | -7.44679 | -1.17111 | -1.40369 |
| C  | -1.07224 | 3.17926  | 1.74492  | C                  | -7.91373 | -2.45368 | -1.81054 |
| C  | -0.31060 | 4.31433  | 2.01134  | H                  | -9.00907 | -2.40042 | -1.78102 |
| C  | 1.08430  | 4.22016  | 1.97093  | H                  | -7.58532 | -2.69140 | -2.83577 |
| C  | 1.67379  | 3.00002  | 1.64621  | H                  | -7.56559 | -3.24140 | -1.12210 |
| C  | 0.85819  | 1.89685  | 1.37764  | O                  | -1.05933 | -0.95752 | -1.50005 |
| N  | -0.50673 | 1.99971  | 1.44769  |                    |          |          |          |
| H  | 1.70677  | 5.09074  | 2.18163  |                    |          |          |          |
| H  | -2.16281 | 3.18897  | 1.77406  | <b>I-[Rh]-TS3b</b> |          |          |          |
| H  | -0.81102 | 5.25313  | 2.25041  | H                  | 2.25646  | -1.77623 | 0.32587  |
| H  | 2.75724  | 2.89535  | 1.60190  | C                  | 1.43937  | -2.50988 | 0.13191  |
| O  | -1.18474 | 0.02310  | 3.38928  | C                  | 1.83305  | -3.81825 | -0.32056 |
| H  | -2.09221 | 0.29919  | 3.61649  | C                  | 0.40317  | -2.50786 | 1.14539  |
|    |          |          |          | C                  | 1.07286  | -4.95211 | -0.02718 |



|   |          |          |          |                    |          |          |          |
|---|----------|----------|----------|--------------------|----------|----------|----------|
| H | 2.71306  | -3.89586 | -0.96552 | H                  | -6.81846 | 7.02908  | -0.03958 |
| C | -0.34134 | -3.64473 | 1.44023  | H                  | -5.11173 | 7.46771  | -0.38681 |
| C | -0.03423 | -4.88251 | 0.83298  | H                  | -5.94417 | 6.21846  | -1.38287 |
| H | 1.36973  | -5.91596 | -0.45307 | C                  | 1.15465  | 1.74739  | -1.15333 |
| H | -1.16172 | -3.58555 | 2.15799  | C                  | -0.01061 | 2.50900  | -1.10629 |
| H | -0.62964 | -5.76835 | 1.06379  | C                  | -0.60740 | 2.79459  | 0.14124  |
| O | 0.22094  | -1.28339 | 1.74605  | C                  | 0.02318  | 2.32369  | 1.31174  |
| C | -0.84788 | -1.14554 | 2.66496  | C                  | 1.19206  | 1.57184  | 1.21227  |
| H | -1.81205 | -1.40990 | 2.19952  | N                  | 1.70366  | 1.29757  | -0.00453 |
| H | -0.69305 | -1.77412 | 3.55926  | H                  | -0.47691 | 2.84689  | -2.03065 |
| H | -0.86898 | -0.08924 | 2.96172  | H                  | -0.38966 | 2.55504  | 2.29250  |
| C | -4.06682 | -4.37286 | -0.98059 | Rh                 | 3.33476  | 0.22936  | -0.11487 |
| C | -2.88272 | -3.65747 | -1.17100 | C                  | 1.91279  | 1.33589  | -2.35099 |
| C | -2.76311 | -2.31732 | -0.75811 | C                  | 1.55869  | 1.66227  | -3.66091 |
| C | -3.87995 | -1.70764 | -0.14249 | C                  | 2.35766  | 1.21828  | -4.71698 |
| C | -5.06093 | -2.40412 | 0.05581  | C                  | 3.49878  | 0.46186  | -4.44215 |
| C | -5.16350 | -3.74775 | -0.36264 | C                  | 3.80594  | 0.16648  | -3.11499 |
| H | -2.04330 | -4.16714 | -1.64478 | N                  | 3.03224  | 0.58390  | -2.10337 |
| H | -3.79383 | -0.66803 | 0.17951  | H                  | 2.08900  | 1.46507  | -5.74529 |
| H | -5.92473 | -1.93622 | 0.53209  | H                  | 0.66513  | 2.25649  | -3.85042 |
| C | -1.52390 | -1.51732 | -0.91540 | H                  | 4.14828  | 0.09880  | -5.23909 |
| C | -0.32917 | -2.07579 | -1.68075 | H                  | 4.68011  | -0.42143 | -2.82966 |
| H | -0.48766 | -1.76415 | -2.73420 | C                  | 3.80516  | -0.38936 | 2.84554  |
| O | 0.89099  | -1.57720 | -1.23042 | C                  | 3.51379  | -0.31653 | 4.20634  |
| H | -0.33626 | -3.18179 | -1.68088 | C                  | 2.42283  | 0.44991  | 4.62101  |
| H | -4.12546 | -5.41020 | -1.30932 | C                  | 1.64826  | 1.10795  | 3.66455  |
| O | -6.35374 | -4.35397 | -0.12894 | C                  | 1.97669  | 0.98309  | 2.31342  |
| C | -6.51867 | -5.71329 | -0.53286 | N                  | 3.06433  | 0.24677  | 1.92671  |
| H | -7.54228 | -5.98735 | -0.25073 | H                  | 2.17210  | 0.53362  | 5.67960  |
| H | -6.39432 | -5.81937 | -1.62236 | H                  | 4.64926  | -0.96802 | 2.46806  |
| H | -5.80325 | -6.36932 | -0.01181 | H                  | 4.14034  | -0.85209 | 4.92002  |
| O | -1.46964 | -0.36145 | -0.47737 | H                  | 0.78707  | 1.70601  | 3.96086  |
| C | -1.87194 | 3.55083  | 0.22531  | O                  | 4.95141  | -0.94477 | -0.34511 |
| C | -2.21550 | 4.51595  | -0.73867 | H                  | 5.52297  | -0.82688 | 0.43202  |
| C | -2.78082 | 3.32017  | 1.28200  | O                  | 4.42226  | 1.87563  | 0.03927  |
| C | -3.40613 | 5.24019  | -0.65720 | H                  | 4.21612  | 2.38817  | -0.76352 |
| H | -1.53054 | 4.73146  | -1.56123 |                    |          |          |          |
| C | -3.97397 | 4.02515  | 1.37026  | <b>I-[2Rh]-IM1</b> |          |          |          |
| H | -2.56292 | 2.55714  | 2.03181  | O                  | 0.00011  | -0.94577 | -1.66772 |
| C | -4.29501 | 4.99715  | 0.40382  | O                  | 1.57102  | -0.01033 | -2.96768 |
| H | -3.62805 | 5.99151  | -1.41468 | C                  | 0.45961  | -0.60434 | -2.80258 |
| H | -4.68026 | 3.83539  | 2.18052  | C                  | -0.38307 | -0.88743 | -4.01518 |
| O | -5.47614 | 5.64539  | 0.57507  | H                  | -1.00642 | -0.00040 | -4.21525 |
| C | -5.84614 | 6.64630  | -0.37231 | H                  | 0.24862  | -1.07067 | -4.89402 |

|    |          |          |          |   |          |          |          |
|----|----------|----------|----------|---|----------|----------|----------|
| H  | -1.04785 | -1.74061 | -3.82987 | C | 0.62917  | 2.56375  | 0.90346  |
| O  | 4.41439  | 0.36502  | -2.92212 | C | 0.24743  | 3.90674  | 0.96233  |
| H  | 5.25580  | 0.24515  | -2.44989 | C | -0.54638 | 4.43820  | -0.05511 |
| Rh | 2.94299  | 0.13106  | -1.38702 | C | -0.93569 | 3.61293  | -1.11161 |
| C  | 5.86655  | 0.25430  | 2.24179  | C | -0.51378 | 2.28486  | -1.12222 |
| C  | 5.30401  | 1.44366  | 1.76368  | N | 0.25152  | 1.76927  | -0.14913 |
| C  | 5.58865  | -0.96270 | 1.61454  | H | -0.85382 | 5.48423  | -0.02073 |
| C  | 4.44620  | 1.39028  | 0.66356  | H | 0.56284  | 4.52420  | 1.80280  |
| H  | 5.52569  | 2.39658  | 2.24246  | H | -1.55600 | 3.98380  | -1.92773 |
| C  | 4.72461  | -0.97512 | 0.51473  | H | -0.79083 | 1.60934  | -1.93004 |
| H  | 6.03046  | -1.89049 | 1.97618  | C | 1.30386  | -3.14415 | 0.48398  |
| N  | 4.16558  | 0.18819  | 0.09267  | C | 1.75913  | -4.25715 | 1.18471  |
| H  | 6.52873  | 0.27879  | 3.10783  | C | 2.45310  | -4.06642 | 2.38435  |
| C  | 3.78623  | 2.50920  | -0.01891 | C | 2.63633  | -2.77078 | 2.86478  |
| C  | 3.96437  | 3.85657  | 0.30987  | C | 2.14313  | -1.69104 | 2.12578  |
| C  | 3.33939  | 4.83457  | -0.46197 | N | 1.51463  | -1.89225 | 0.92450  |
| C  | 2.56799  | 4.44455  | -1.56183 | H | 2.83664  | -4.91901 | 2.94660  |
| C  | 2.41590  | 3.08804  | -1.83314 | H | 0.76724  | -3.23456 | -0.46086 |
| N  | 2.98455  | 2.14132  | -1.06751 | H | 1.58038  | -5.25448 | 0.78274  |
| H  | 3.46275  | 5.89009  | -0.21539 | H | 3.14848  | -2.59099 | 3.80963  |
| H  | 4.59211  | 4.12944  | 1.15778  | H | 3.10883  | 2.01825  | 4.88201  |
| H  | 2.07562  | 5.17783  | -2.20072 | H | -2.15434 | 0.47665  | 0.82312  |
| H  | 1.81985  | 2.73067  | -2.67313 | C | -7.50131 | 1.26513  | -0.73645 |
| C  | 3.04751  | -2.82021 | -2.13912 | C | -6.13411 | 1.25418  | -1.03575 |
| C  | 3.52965  | -4.12359 | -2.03112 | C | -5.16234 | 1.15724  | -0.03086 |
| C  | 4.43258  | -4.43090 | -1.01104 | C | -5.59498 | 1.12537  | 1.30395  |
| C  | 4.83960  | -3.41994 | -0.13951 | C | -6.95120 | 1.13934  | 1.62356  |
| C  | 4.33026  | -2.12917 | -0.30229 | C | -7.91502 | 1.19035  | 0.60270  |
| N  | 3.42329  | -1.84823 | -1.29302 | H | -5.82804 | 1.30695  | -2.08430 |
| H  | 4.81981  | -5.44412 | -0.89505 | H | -4.84883 | 1.06841  | 2.09711  |
| H  | 2.34567  | -2.53647 | -2.92333 | H | -7.28606 | 1.09523  | 2.66208  |
| H  | 3.19005  | -4.87989 | -2.73915 | C | -3.68135 | 1.07647  | -0.39143 |
| H  | 5.55336  | -3.62335 | 0.65801  | C | -3.34680 | -0.16221 | -1.23817 |
| O  | -1.07922 | -0.57851 | 1.07423  | H | -2.33094 | -0.07194 | -1.64161 |
| H  | -1.49988 | -1.26117 | 0.52158  | O | -3.31423 | -1.41116 | -0.51909 |
| C  | 1.41601  | 1.87972  | 1.93808  | C | -4.39209 | -1.75966 | 0.26705  |
| C  | 1.97222  | 2.43358  | 3.09572  | C | -4.18957 | -1.93290 | 1.63596  |
| C  | 2.65918  | 1.59915  | 3.98132  | C | -5.66419 | -2.00708 | -0.30002 |
| C  | 2.76528  | 0.22674  | 3.72640  | C | -5.24867 | -2.31661 | 2.46751  |
| C  | 2.19616  | -0.28863 | 2.55995  | H | -3.19333 | -1.72871 | 2.03233  |
| N  | 1.57308  | 0.55397  | 1.69390  | C | -6.72692 | -2.36930 | 0.53888  |
| H  | 1.87001  | 3.49902  | 3.29848  | C | -6.51576 | -2.52105 | 1.91665  |
| H  | 3.28370  | -0.43067 | 4.42326  | H | -5.08276 | -2.43926 | 3.53979  |
| Rh | 0.81425  | -0.17885 | 0.09225  | H | -7.71927 | -2.54198 | 0.12192  |

|                    |           |          |          |    |          |          |          |
|--------------------|-----------|----------|----------|----|----------|----------|----------|
| H                  | -7.35562  | -2.80552 | 2.55444  | H  | 2.22218  | 5.45386  | -1.46649 |
| O                  | -5.76066  | -1.86596 | -1.64969 | H  | 1.79957  | 3.10990  | -2.27949 |
| C                  | -7.03538  | -2.06281 | -2.25585 | C  | 2.69895  | -2.47394 | -2.63322 |
| H                  | -7.38378  | -3.09850 | -2.11232 | C  | 3.07895  | -3.81259 | -2.73192 |
| H                  | -7.78104  | -1.36149 | -1.84835 | C  | 3.94182  | -4.34280 | -1.77166 |
| H                  | -6.89269  | -1.86728 | -3.32549 | C  | 4.42009  | -3.51301 | -0.75506 |
| H                  | -4.05418  | -0.22859 | -2.07783 | C  | 4.01422  | -2.17770 | -0.71461 |
| H                  | -8.22858  | 1.33054  | -1.54577 | N  | 3.13516  | -1.68377 | -1.64308 |
| O                  | -9.22403  | 1.17006  | 1.00154  | H  | 4.24856  | -5.38849 | -1.81410 |
| C                  | -10.22826 | 1.16795  | -0.00709 | H  | 2.03215  | -2.01076 | -3.35954 |
| H                  | -11.18867 | 1.11607  | 0.52085  | H  | 2.69384  | -4.42113 | -3.55000 |
| H                  | -10.19286 | 2.08955  | -0.61152 | H  | 5.11075  | -3.89617 | -0.00498 |
| H                  | -10.12572 | 0.29222  | -0.66967 | O  | -1.12009 | -0.82636 | 1.96846  |
| H                  | -3.47959  | 1.91468  | -1.09206 | H  | -1.50048 | -1.68960 | 1.73289  |
| O                  | -2.87405  | 1.21278  | 0.75471  | C  | 1.44733  | 1.61220  | 2.16448  |
|                    |           |          |          | C  | 2.06358  | 1.93888  | 3.37771  |
|                    |           |          |          | C  | 2.68257  | 0.92511  | 4.11414  |
|                    |           |          |          | C  | 2.66387  | -0.39833 | 3.65585  |
|                    |           |          |          | C  | 2.03764  | -0.68198 | 2.44022  |
|                    |           |          |          | N  | 1.48199  | 0.32978  | 1.72707  |
|                    |           |          |          | H  | 2.06017  | 2.96578  | 3.74108  |
|                    |           |          |          | H  | 3.13106  | -1.19163 | 4.23794  |
|                    |           |          |          | Rh | 0.63916  | -0.09326 | 0.05505  |
|                    |           |          |          | C  | 0.68490  | 2.49702  | 1.26964  |
|                    |           |          |          | C  | 0.38176  | 3.83387  | 1.54533  |
|                    |           |          |          | C  | -0.42155 | 4.54555  | 0.65236  |
|                    |           |          |          | C  | -0.91993 | 3.89810  | -0.48053 |
|                    |           |          |          | C  | -0.59179 | 2.55951  | -0.69521 |
|                    |           |          |          | N  | 0.22101  | 1.89063  | 0.13479  |
|                    |           |          |          | H  | -0.66024 | 5.59229  | 0.84592  |
|                    |           |          |          | H  | 0.76215  | 4.30509  | 2.45079  |
|                    |           |          |          | H  | -1.56179 | 4.41484  | -1.19411 |
|                    |           |          |          | H  | -0.96025 | 2.00550  | -1.55510 |
|                    |           |          |          | C  | 0.91763  | -3.11250 | -0.03404 |
|                    |           |          |          | C  | 1.28183  | -4.35310 | 0.48509  |
|                    |           |          |          | C  | 1.97876  | -4.40120 | 1.69619  |
|                    |           |          |          | C  | 2.26381  | -3.20919 | 2.36350  |
|                    |           |          |          | C  | 1.86011  | -1.99522 | 1.80195  |
|                    |           |          |          | N  | 1.21444  | -1.96335 | 0.59331  |
|                    |           |          |          | H  | 2.28997  | -5.35589 | 2.12200  |
|                    |           |          |          | H  | 0.38163  | -3.00995 | -0.97826 |
|                    |           |          |          | H  | 1.02811  | -5.26107 | -0.06180 |
|                    |           |          |          | H  | 2.78825  | -3.21924 | 3.31837  |
|                    |           |          |          | H  | 3.17700  | 1.16395  | 5.05608  |
| <b>I-[2Rh]-TS1</b> |           |          |          |    |          |          |          |
| O                  | -0.17825  | -0.53111 | -1.79995 |    |          |          |          |
| O                  | 1.42573   | 0.52204  | -2.96524 |    |          |          |          |
| C                  | 0.28502   | -0.03566 | -2.86980 |    |          |          |          |
| C                  | -0.58001  | -0.08485 | -4.10192 |    |          |          |          |
| H                  | -1.16334  | 0.84844  | -4.15566 |    |          |          |          |
| H                  | 0.03610   | -0.15812 | -5.00704 |    |          |          |          |
| H                  | -1.28282  | -0.92450 | -4.03698 |    |          |          |          |
| O                  | 4.23677   | 0.65804  | -2.82343 |    |          |          |          |
| H                  | 5.09213   | 0.52790  | -2.37976 |    |          |          |          |
| Rh                 | 2.78378   | 0.30776  | -1.41481 |    |          |          |          |
| C                  | 5.75948   | -0.30463 | 2.11344  |    |          |          |          |
| C                  | 5.28231   | 0.97949  | 1.82541  |    |          |          |          |
| C                  | 5.38235   | -1.39791 | 1.32853  |    |          |          |          |
| C                  | 4.40559   | 1.14586  | 0.75043  |    |          |          |          |
| H                  | 5.58690   | 1.83202  | 2.43059  |    |          |          |          |
| C                  | 4.50390   | -1.18905 | 0.26018  |    |          |          |          |
| H                  | 5.76283   | -2.39471 | 1.54669  |    |          |          |          |
| N                  | 4.03332   | 0.05983  | 0.02840  |    |          |          |          |
| H                  | 6.43563   | -0.45226 | 2.95580  |    |          |          |          |
| C                  | 3.81401   | 2.39610  | 0.24641  |    |          |          |          |
| C                  | 4.08908   | 3.66716  | 0.75715  |    |          |          |          |
| C                  | 3.50855   | 4.78357  | 0.15430  |    |          |          |          |
| C                  | 2.68302   | 4.60632  | -0.95960 |    |          |          |          |
| C                  | 2.43887   | 3.31403  | -1.42033 |    |          |          |          |
| N                  | 2.96795   | 2.23914  | -0.81820 |    |          |          |          |
| H                  | 3.70729   | 5.78203  | 0.54553  |    |          |          |          |
| H                  | 4.75285   | 3.77939  | 1.61359  |    |          |          |          |

|                    |           |          |          |    |          |          |          |
|--------------------|-----------|----------|----------|----|----------|----------|----------|
| H                  | -1.64583  | -0.22188 | 1.28101  | H  | 1.42352  | -1.32288 | -5.13431 |
| C                  | -6.68559  | 0.89768  | -1.61111 | H  | 1.22018  | 0.44404  | -5.26233 |
| C                  | -5.39476  | 0.35515  | -1.65746 | H  | 2.86710  | -0.24145 | -5.21880 |
| C                  | -4.43928  | 0.64106  | -0.67406 | O  | 4.86993  | 1.31675  | -1.14416 |
| C                  | -4.80063  | 1.52542  | 0.35261  | H  | 5.37883  | 1.10778  | -0.34232 |
| C                  | -6.07705  | 2.08252  | 0.41668  | Rh | 2.91728  | 0.58714  | -0.71914 |
| C                  | -7.03569  | 1.76220  | -0.56048 | C  | 3.37834  | 0.55580  | 3.91705  |
| H                  | -5.13976  | -0.31231 | -2.48601 | C  | 2.89322  | 1.70121  | 3.27513  |
| H                  | -4.04197  | 1.75376  | 1.10315  | C  | 3.75214  | -0.56802 | 3.17560  |
| H                  | -6.36098  | 2.76429  | 1.22211  | C  | 2.77131  | 1.69505  | 1.88413  |
| C                  | -3.01896  | 0.05367  | -0.71563 | H  | 2.60972  | 2.58263  | 3.84916  |
| C                  | -3.03880  | -1.49210 | -0.71260 | C  | 3.61569  | -0.53635 | 1.78393  |
| H                  | -2.03185  | -1.84215 | -0.96954 | H  | 4.14160  | -1.45721 | 3.66990  |
| O                  | -3.29270  | -2.08819 | 0.57733  | N  | 3.11173  | 0.57617  | 1.18994  |
| C                  | -4.45352  | -1.80533 | 1.24587  | H  | 3.46908  | 0.54231  | 5.00362  |
| C                  | -4.36037  | -1.28677 | 2.53953  | C  | 2.32350  | 2.78947  | 1.01427  |
| C                  | -5.72723  | -2.11319 | 0.70615  | C  | 1.97568  | 4.06791  | 1.46233  |
| C                  | -5.50931  | -1.04957 | 3.30367  | C  | 1.62182  | 5.04359  | 0.53246  |
| H                  | -3.35955  | -1.05401 | 2.90902  | C  | 1.64584  | 4.72692  | -0.83044 |
| C                  | -6.87616  | -1.85644 | 1.46814  | C  | 1.99265  | 3.43641  | -1.21795 |
| C                  | -6.76619  | -1.32742 | 2.76206  | N  | 2.29821  | 2.48240  | -0.32135 |
| H                  | -5.41820  | -0.63754 | 4.31129  | H  | 1.34054  | 6.04340  | 0.86621  |
| H                  | -7.86242  | -2.07716 | 1.05922  | H  | 1.98884  | 4.29014  | 2.52881  |
| H                  | -7.67366  | -1.13924 | 3.34051  | H  | 1.38934  | 5.46453  | -1.59088 |
| O                  | -5.74216  | -2.65714 | -0.53936 | H  | 2.02184  | 3.13564  | -2.26548 |
| C                  | -6.99815  | -2.87656 | -1.16269 | C  | 4.06876  | -2.13300 | -1.45794 |
| H                  | -7.59603  | -3.61945 | -0.60819 | C  | 4.69522  | -3.34628 | -1.17918 |
| H                  | -7.56665  | -1.93584 | -1.24747 | C  | 4.95352  | -3.68573 | 0.15062  |
| H                  | -6.77666  | -3.26252 | -2.16503 | C  | 4.59581  | -2.79169 | 1.16072  |
| H                  | -3.75911  | -1.88081 | -1.44829 | C  | 3.98352  | -1.58247 | 0.82059  |
| H                  | -7.40273  | 0.64589  | -2.39332 | N  | 3.70871  | -1.27711 | -0.48864 |
| O                  | -8.26509  | 2.33753  | -0.41523 | H  | 5.43155  | -4.63363 | 0.40171  |
| C                  | -9.27132  | 2.01350  | -1.35959 | H  | 3.84751  | -1.82705 | -2.48052 |
| H                  | -10.17195 | 2.55718  | -1.04823 | H  | 4.96469  | -4.01067 | -2.00051 |
| H                  | -8.98859  | 2.33095  | -2.37817 | H  | 4.79616  | -3.02325 | 2.20621  |
| H                  | -9.48299  | 0.93013  | -1.36714 | C  | -0.43543 | 1.42924  | 1.30916  |
| H                  | -2.65190  | 0.26612  | -1.75556 | C  | -0.69018 | 1.85217  | 2.61678  |
| O                  | -2.19806  | 0.59913  | 0.23075  | C  | -0.41933 | 0.98157  | 3.67520  |
|                    |           |          |          | C  | 0.08624  | -0.30011 | 3.42450  |
|                    |           |          |          | C  | 0.34217  | -0.68034 | 2.10628  |
| <b>I-[2Rh]-IM2</b> |           |          |          | N  | 0.10219  | 0.19978  | 1.09535  |
| O                  | 0.92222   | -0.83907 | -2.69322 | H  | -1.10393 | 2.84288  | 2.80058  |
| O                  | 2.68966   | 0.54246  | -2.79524 | H  | 0.28241  | -0.99277 | 4.24212  |
| C                  | 1.82374   | -0.21595 | -3.33566 | Rh | 0.46100  | -0.34561 | -0.70645 |
| C                  | 1.84601   | -0.35577 | -4.83300 |    |          |          |          |

|   |          |          |          |                    |          |          |          |
|---|----------|----------|----------|--------------------|----------|----------|----------|
| C | -0.73611 | 2.13992  | 0.06456  | O                  | -6.02813 | -1.61547 | -1.44304 |
| C | -1.41787 | 3.35697  | 0.00120  | C                  | -7.20037 | -0.81847 | -1.29756 |
| C | -1.72031 | 3.90763  | -1.24503 | H                  | -8.04170 | -1.41710 | -0.91225 |
| C | -1.32525 | 3.22789  | -2.39896 | H                  | -7.01630 | 0.03721  | -0.62802 |
| C | -0.63358 | 2.02378  | -2.27465 | H                  | -7.44150 | -0.45269 | -2.30303 |
| N | -0.33981 | 1.48801  | -1.07850 | H                  | -4.17099 | -1.29413 | -2.87130 |
| H | -2.26165 | 4.85230  | -1.31096 | H                  | -5.38780 | 2.68569  | -0.75185 |
| H | -1.72351 | 3.85325  | 0.92145  | O                  | -5.24087 | 2.49539  | 1.97957  |
| H | -1.54242 | 3.61849  | -3.39334 | C                  | -6.10989 | 3.52535  | 1.52267  |
| H | -0.30504 | 1.46540  | -3.15107 | H                  | -6.51677 | 4.00172  | 2.42347  |
| C | 1.33225  | -3.22289 | -0.29986 | H                  | -5.56304 | 4.27533  | 0.92702  |
| C | 1.56102  | -4.36774 | 0.45761  | H                  | -6.93727 | 3.11368  | 0.92087  |
| C | 1.43869  | -4.29594 | 1.84994  | H                  | -2.05098 | -0.11471 | -2.54218 |
| C | 1.05799  | -3.09093 | 2.43733  | O                  | -1.31980 | -1.46855 | -1.13614 |
| C | 0.82536  | -1.97728 | 1.62372  |                    |          |          |          |
| N | 1.00135  | -2.05053 | 0.26691  |                    |          |          |          |
| H | 1.62696  | -5.17356 | 2.47009  | <b>I-[2Rh]-TS2</b> |          |          |          |
| H | 1.42334  | -3.22047 | -1.38645 | O                  | -1.23968 | -0.18774 | -2.89310 |
| H | 1.84220  | -5.29472 | -0.04235 | O                  | -3.33887 | -0.72943 | -2.28631 |
| H | 0.92857  | -3.00779 | 3.51615  | C                  | -2.42982 | -0.55167 | -3.15618 |
| H | -0.61022 | 1.29742  | 4.70122  | C                  | -2.77142 | -0.82857 | -4.59541 |
| C | -4.73850 | 1.90947  | -0.34652 | H                  | -2.59620 | -1.89964 | -4.78995 |
| C | -4.01876 | 1.08332  | -1.21887 | H                  | -3.82894 | -0.61063 | -4.79276 |
| C | -3.16342 | 0.08007  | -0.74610 | H                  | -2.12450 | -0.24603 | -5.26366 |
| C | -3.04046 | -0.07800 | 0.64254  | O                  | -5.20386 | -0.24312 | -0.17570 |
| C | -3.74292 | 0.73334  | 1.52921  | H                  | -5.38584 | 0.10524  | 0.71358  |
| C | -4.59618 | 1.73581  | 1.03947  | C                  | 3.53318  | 3.31544  | -0.67506 |
| H | -4.12484 | 1.23778  | -2.29665 | C                  | 3.17524  | 2.31198  | -1.57361 |
| H | -2.37995 | -0.85365 | 1.02943  | C                  | 3.02216  | 0.97598  | -1.16423 |
| H | -3.64083 | 0.60773  | 2.60885  | C                  | 3.23792  | 0.66924  | 0.19671  |
| C | -2.37987 | -0.79792 | -1.72250 | C                  | 3.62465  | 1.65157  | 1.09802  |
| C | -3.27463 | -1.79925 | -2.48043 | C                  | 3.75649  | 2.98596  | 0.67382  |
| H | -2.70058 | -2.21016 | -3.32241 | H                  | 3.00974  | 2.55677  | -2.62405 |
| O | -3.64110 | -2.96669 | -1.72112 | H                  | 3.09131  | -0.34477 | 0.56790  |
| C | -4.23002 | -2.81281 | -0.48745 | H                  | 3.78992  | 1.41300  | 2.14964  |
| C | -3.60834 | -3.40442 | 0.61368  | C                  | 2.66753  | -0.04698 | -2.18800 |
| C | -5.46306 | -2.13759 | -0.31905 | H                  | 0.98454  | -0.18357 | -1.59052 |
| C | -4.17314 | -3.31107 | 1.89131  | C                  | 2.80308  | -1.53022 | -1.82990 |
| H | -2.65901 | -3.91774 | 0.44939  | H                  | 2.19591  | -2.11667 | -2.52900 |
| C | -6.01977 | -2.03540 | 0.96277  | O                  | 4.16791  | -1.96322 | -2.05379 |
| C | -5.37322 | -2.61694 | 2.06234  | C                  | 5.09283  | -1.52395 | -1.12546 |
| H | -3.66817 | -3.76798 | 2.74499  | C                  | 6.05605  | -0.59201 | -1.50895 |
| H | -6.95969 | -1.50282 | 1.10893  | C                  | 5.06828  | -2.01663 | 0.20011  |
| H | -5.82186 | -2.52451 | 3.05394  | C                  | 6.99687  | -0.12110 | -0.58481 |
|   |          |          |          | H                  | 6.03683  | -0.22807 | -2.53800 |

|    |          |          |          |                    |          |          |          |
|----|----------|----------|----------|--------------------|----------|----------|----------|
| C  | 6.00497  | -1.53622 | 1.12555  | H                  | -0.84653 | -2.76964 | -2.70878 |
| C  | 6.96041  | -0.59002 | 0.73058  | H                  | -0.40773 | -5.20525 | -2.36705 |
| H  | 7.74155  | 0.61610  | -0.89131 | H                  | 0.74848  | -4.29475 | 1.69844  |
| H  | 5.99113  | -1.89242 | 2.15569  | H                  | 1.45391  | -0.53488 | 4.46610  |
| H  | 7.68002  | -0.22337 | 1.46594  | Rh                 | -3.07605 | -0.15482 | -0.29024 |
| O  | 4.09024  | -2.91922 | 0.48984  | C                  | -2.26260 | 1.20329  | 4.09396  |
| C  | 3.97612  | -3.36970 | 1.83820  | C                  | -2.31001 | -0.16269 | 3.78635  |
| H  | 4.89020  | -3.89644 | 2.15595  | C                  | -2.47288 | 2.16046  | 3.09810  |
| H  | 3.77776  | -2.52766 | 2.51994  | C                  | -2.55481 | -0.55184 | 2.46902  |
| H  | 3.13041  | -4.06610 | 1.85232  | H                  | -2.15642 | -0.91336 | 4.56071  |
| H  | 2.49839  | -1.75835 | -0.80126 | C                  | -2.71664 | 1.73453  | 1.78795  |
| O  | 2.56535  | 0.26853  | -3.39390 | H                  | -2.44889 | 3.22412  | 3.33231  |
| H  | 3.62698  | 4.34369  | -1.02353 | N                  | -2.72952 | 0.40253  | 1.51127  |
| O  | 4.08002  | 3.89026  | 1.63661  | H                  | -2.06347 | 1.52065  | 5.11802  |
| C  | 4.16897  | 5.26588  | 1.26972  | C                  | -2.67446 | -1.91251 | 1.93842  |
| H  | 4.41686  | 5.80722  | 2.19076  | C                  | -2.59401 | -3.07731 | 2.71018  |
| H  | 4.96253  | 5.42696  | 0.52254  | C                  | -2.77745 | -4.31541 | 2.09960  |
| H  | 3.20765  | 5.63133  | 0.87392  | C                  | -3.05841 | -4.36328 | 0.72789  |
| C  | 0.42653  | 0.83780  | 1.53092  | C                  | -3.11945 | -3.17562 | 0.00851  |
| C  | 0.88430  | 0.77719  | 2.84860  | N                  | -2.91292 | -1.97791 | 0.58815  |
| C  | 1.09948  | -0.47426 | 3.43670  | H                  | -2.71083 | -5.23283 | 2.68610  |
| C  | 0.86973  | -1.64784 | 2.71134  | H                  | -2.38959 | -3.00342 | 3.77812  |
| C  | 0.40273  | -1.55227 | 1.39710  | H                  | -3.21689 | -5.31088 | 0.21269  |
| N  | 0.17244  | -0.32161 | 0.86179  | H                  | -3.32810 | -3.15797 | -1.06164 |
| H  | 1.07726  | 1.69405  | 3.40387  | C                  | -3.51384 | 2.51803  | -1.67787 |
| H  | 1.04929  | -2.62389 | 3.16018  | C                  | -3.66305 | 3.90249  | -1.70961 |
| Rh | -0.48618 | -0.21929 | -0.93236 | C                  | -3.46166 | 4.63445  | -0.53578 |
| C  | 0.21276  | 2.02554  | 0.70362  | C                  | -3.12918 | 3.95617  | 0.63644  |
| C  | 0.49957  | 3.33686  | 1.10219  | C                  | -3.00510 | 2.56339  | 0.61307  |
| C  | 0.32930  | 4.37943  | 0.19554  | N                  | -3.18457 | 1.86012  | -0.55349 |
| C  | -0.09972 | 4.08697  | -1.10576 | H                  | -3.56151 | 5.72076  | -0.53184 |
| C  | -0.37455 | 2.76847  | -1.44734 | H                  | -3.66112 | 1.90584  | -2.56818 |
| N  | -0.24986 | 1.76052  | -0.56358 | H                  | -3.92695 | 4.39145  | -2.64782 |
| H  | 0.54491  | 5.40666  | 0.49258  | H                  | -2.97302 | 4.49761  | 1.56916  |
| H  | 0.86656  | 3.52667  | 2.11043  |                    |          |          |          |
| H  | -0.22892 | 4.87128  | -1.85165 |                    |          |          |          |
| H  | -0.71496 | 2.48719  | -2.44425 | <b>I-[2Rh]-IM3</b> |          |          |          |
| C  | -0.49879 | -3.15052 | -1.74841 | O                  | -1.26981 | -0.16902 | -2.89601 |
| C  | -0.24675 | -4.50444 | -1.54752 | O                  | -3.35858 | -0.74098 | -2.28313 |
| C  | 0.20110  | -4.93551 | -0.29452 | C                  | -2.45758 | -0.54154 | -3.15643 |
| C  | 0.39673  | -3.99264 | 0.71285  | C                  | -2.80618 | -0.80156 | -4.59722 |
| C  | 0.14916  | -2.64125 | 0.45083  | H                  | -2.62051 | -1.86771 | -4.80838 |
| N  | -0.31775 | -2.23614 | -0.77852 | H                  | -3.86741 | -0.59259 | -4.78407 |
| H  | 0.39578  | -5.99178 | -0.10398 | H                  | -2.17051 | -0.20232 | -5.26150 |
|    |          |          |          | O                  | -5.21293 | -0.31087 | -0.16299 |

|   |          |          |          |    |          |          |          |
|---|----------|----------|----------|----|----------|----------|----------|
| H | -5.39546 | 0.03482  | 0.72720  | H  | 1.08421  | 1.68952  | 3.39312  |
| C | 3.45579  | 3.37864  | -0.73496 | H  | 1.10532  | -2.62649 | 3.12125  |
| C | 3.15862  | 2.34801  | -1.62300 | Rh | -0.49624 | -0.21425 | -0.94139 |
| C | 3.05770  | 1.01177  | -1.19501 | C  | 0.18149  | 2.02863  | 0.70726  |
| C | 3.26323  | 0.73417  | 0.17418  | C  | 0.43797  | 3.34277  | 1.11827  |
| C | 3.59221  | 1.74577  | 1.06557  | C  | 0.23849  | 4.39017  | 0.22393  |
| C | 3.67249  | 3.07836  | 0.62258  | C  | -0.19051 | 4.10095  | -1.07872 |
| H | 2.99843  | 2.57016  | -2.67929 | C  | -0.43712 | 2.78064  | -1.43224 |
| H | 3.15412  | -0.27930 | 0.55906  | N  | -0.28261 | 1.76584  | -0.56007 |
| H | 3.75027  | 1.53102  | 2.12336  | H  | 0.42921  | 5.41928  | 0.53111  |
| C | 2.77012  | -0.03773 | -2.20645 | H  | 0.80284  | 3.53080  | 2.12753  |
| H | 0.94381  | -0.16625 | -1.63706 | H  | -0.34278 | 4.88981  | -1.81538 |
| C | 2.86462  | -1.51264 | -1.80522 | H  | -0.77783 | 2.50186  | -2.42974 |
| H | 2.25585  | -2.10395 | -2.49873 | C  | -0.47377 | -3.13868 | -1.77943 |
| O | 4.22287  | -1.97815 | -1.99644 | C  | -0.19457 | -4.48916 | -1.59390 |
| C | 5.14544  | -1.50941 | -1.07927 | C  | 0.27686  | -4.92309 | -0.35016 |
| C | 6.11000  | -0.58973 | -1.48762 | C  | 0.46683  | -3.98612 | 0.66337  |
| C | 5.11432  | -1.96131 | 0.26033  | C  | 0.19037  | -2.63691 | 0.41717  |
| C | 7.04881  | -0.09302 | -0.57486 | N  | -0.29803 | -2.22944 | -0.80333 |
| H | 6.09560  | -0.25794 | -2.52757 | H  | 0.49421  | -5.97713 | -0.17214 |
| C | 6.04911  | -1.45514 | 1.17397  | H  | -0.83994 | -2.75571 | -2.73215 |
| C | 7.00743  | -0.52291 | 0.75356  | H  | -0.35235 | -5.18554 | -2.41784 |
| H | 7.79598  | 0.63321  | -0.90083 | H  | 0.83723  | -4.29074 | 1.64128  |
| H | 6.03166  | -1.78029 | 2.21422  | H  | 1.49795  | -0.54163 | 4.43689  |
| H | 7.72582  | -0.13622 | 1.47980  | Rh | -3.08467 | -0.19086 | -0.28272 |
| O | 4.13240  | -2.85156 | 0.57295  | C  | -2.24844 | 1.11800  | 4.11279  |
| C | 4.02698  | -3.27939 | 1.92955  | C  | -2.27796 | -0.24407 | 3.78596  |
| H | 4.94226  | -3.80341 | 2.24846  | C  | -2.48111 | 2.08560  | 3.13208  |
| H | 3.83611  | -2.42592 | 2.59893  | C  | -2.52810 | -0.61855 | 2.46550  |
| H | 3.17902  | -3.97250 | 1.96128  | H  | -2.10760 | -1.00327 | 4.54844  |
| H | 2.53866  | -1.70642 | -0.77600 | C  | -2.72905 | 1.67464  | 1.81798  |
| O | 2.68660  | 0.24429  | -3.41655 | H  | -2.47189 | 3.14606  | 3.38133  |
| H | 3.50863  | 4.40514  | -1.09668 | N  | -2.72502 | 0.34634  | 1.52198  |
| O | 3.94066  | 4.00912  | 1.57492  | H  | -2.04594 | 1.42389  | 5.13968  |
| C | 3.98414  | 5.38236  | 1.18869  | C  | -2.63315 | -1.97306 | 1.91771  |
| H | 4.19475  | 5.94528  | 2.10595  | C  | -2.52821 | -3.14680 | 2.67318  |
| H | 4.78478  | 5.56169  | 0.45353  | C  | -2.69911 | -4.37927 | 2.04824  |
| H | 3.01706  | 5.70490  | 0.77073  | C  | -2.99320 | -4.41306 | 0.67857  |
| C | 0.42614  | 0.83831  | 1.52070  | C  | -3.07911 | -3.21729 | -0.02418 |
| C | 0.89746  | 0.77411  | 2.83320  | N  | -2.88414 | -2.02377 | 0.56870  |
| C | 1.13407  | -0.47855 | 3.41094  | H  | -2.61277 | -5.30333 | 2.62161  |
| C | 0.91209  | -1.64984 | 2.67969  | H  | -2.31405 | -3.08365 | 3.73990  |
| C | 0.43574  | -1.55189 | 1.36900  | H  | -3.14270 | -5.35607 | 0.15236  |
| N | 0.18528  | -0.32027 | 0.84332  | H  | -3.29874 | -3.18912 | -1.09190 |

|                    |          |          |          |    |          |          |          |
|--------------------|----------|----------|----------|----|----------|----------|----------|
| C                  | -3.57275 | 2.49473  | -1.62793 | C  | 1.30716  | -0.47444 | 2.16039  |
| C                  | -3.74665 | 3.87654  | -1.63749 | N  | 1.19879  | -1.32913 | 1.07995  |
| C                  | -3.54610 | 4.59482  | -0.45489 | H  | 3.16750  | -2.41567 | 4.25493  |
| C                  | -3.18903 | 3.90540  | 0.70334  | H  | 1.68828  | -3.16946 | 0.26039  |
| C                  | -3.04136 | 2.51532  | 0.65828  | H  | 2.97730  | -3.94565 | 2.24832  |
| N                  | -3.22102 | 1.82572  | -0.51665 | H  | 2.07237  | -0.16857 | 4.15239  |
| H                  | -3.66547 | 5.67896  | -0.43370 | H  | -0.20516 | 3.86862  | 3.21790  |
| H                  | -3.71881 | 1.89324  | -2.52576 | Rh | -2.18194 | -1.60914 | 0.20783  |
| H                  | -4.02897 | 4.37445  | -2.56558 | C  | -3.71946 | 2.31701  | 2.19530  |
| H                  | -3.03258 | 4.43565  | 1.64245  | C  | -3.00625 | 1.38333  | 2.96112  |
| <b>I-[2Rh]-TS3</b> |          |          |          | C  | -3.98104 | 2.07393  | 0.84461  |
| O                  | 0.22356  | -2.19158 | -1.75264 | C  | -2.54698 | 0.21720  | 2.35089  |
| O                  | -1.43500 | -3.32348 | -0.74038 | H  | -2.80732 | 1.56617  | 4.01660  |
| C                  | -0.45862 | -3.24175 | -1.55340 | C  | -3.50698 | 0.89271  | 0.26268  |
| C                  | -0.05850 | -4.47997 | -2.31091 | H  | -4.54345 | 2.79127  | 0.24754  |
| H                  | -0.85676 | -5.23203 | -2.29353 | N  | -2.79133 | 0.01998  | 1.02325  |
| H                  | 0.19906  | -4.21772 | -3.34640 | H  | -4.07451 | 3.23787  | 2.65917  |
| H                  | 0.84431  | -4.90061 | -1.83849 | C  | -1.82700 | -0.89823 | 2.96636  |
| O                  | -3.89472 | -2.73233 | 0.60020  | C  | -1.50824 | -0.98511 | 4.32707  |
| H                  | -4.60261 | -2.06988 | 0.67878  | C  | -0.87804 | -2.12811 | 4.81068  |
| C                  | -0.47636 | 2.12916  | 0.30668  | C  | -0.59423 | -3.17675 | 3.92346  |
| C                  | -0.61733 | 3.18176  | 1.21082  | C  | -0.92536 | -3.03476 | 2.58217  |
| C                  | -0.10033 | 3.04901  | 2.50649  | N  | -1.51091 | -1.92034 | 2.10400  |
| C                  | 0.54966  | 1.87101  | 2.89058  | H  | -0.61822 | -2.20788 | 5.86728  |
| C                  | 0.66602  | 0.82547  | 1.96908  | H  | -1.76001 | -0.15889 | 4.99167  |
| N                  | 0.14453  | 0.97569  | 0.71736  | H  | -0.10652 | -4.09124 | 4.26169  |
| H                  | -1.12851 | 4.09553  | 0.91059  | H  | -0.72065 | -3.81754 | 1.85124  |
| H                  | 0.95628  | 1.76240  | 3.89591  | C  | -3.29183 | -1.33590 | -2.61116 |
| Rh                 | 0.16534  | -0.52195 | -0.46855 | C  | -4.06531 | -0.72854 | -3.59661 |
| C                  | -0.91438 | 2.06382  | -1.07956 | C  | -4.67894 | 0.49806  | -3.31873 |
| C                  | -1.53229 | 3.11256  | -1.77902 | C  | -4.50094 | 1.07540  | -2.06299 |
| C                  | -1.84204 | 2.95659  | -3.12339 | C  | -3.71836 | 0.41861  | -1.10649 |
| C                  | -1.51027 | 1.74487  | -3.75904 | N  | -3.11338 | -0.78213 | -1.40034 |
| C                  | -0.92875 | 0.72838  | -3.01895 | H  | -5.28727 | 1.00022  | -4.07238 |
| N                  | -0.64637 | 0.85811  | -1.70209 | H  | -2.79926 | -2.29462 | -2.77797 |
| H                  | -2.32028 | 3.76478  | -3.67865 | H  | -4.17753 | -1.21549 | -4.56571 |
| H                  | -1.75243 | 4.04380  | -1.25664 | H  | -4.97336 | 2.02536  | -1.81458 |
| H                  | -1.72054 | 1.58315  | -4.81670 | H  | 1.83376  | -0.29417 | -1.39113 |
| H                  | -0.68234 | -0.23749 | -3.46178 | O  | 2.64322  | -0.42349 | -2.09010 |
| C                  | 1.79429  | -2.53721 | 1.14273  | C  | 3.43341  | -1.53841 | -1.80052 |
| C                  | 2.51036  | -2.96042 | 2.25693  | C  | 3.39983  | -2.63359 | -2.65983 |
| C                  | 2.61651  | -2.10901 | 3.36477  | C  | 4.24315  | -1.53329 | -0.64555 |
| C                  | 2.00532  | -0.85819 | 3.31111  | C  | 4.17486  | -3.76210 | -2.37393 |
|                    |          |          |          | H  | 2.75409  | -2.59012 | -3.53802 |



|                    |          |          |          |    |          |          |          |
|--------------------|----------|----------|----------|----|----------|----------|----------|
| C                  | 5.02701  | -2.66382 | -0.37139 | C  | -3.91782 | -1.93249 | 0.78883  |
| C                  | 4.98334  | -3.76672 | -1.23203 | C  | -4.19627 | -0.28171 | 3.03550  |
| H                  | 4.14702  | -4.62763 | -3.03814 | H  | -2.10108 | -0.71298 | 3.40820  |
| H                  | 5.66057  | -2.69028 | 0.51496  | C  | -5.14580 | -1.32968 | 1.06544  |
| H                  | 5.59462  | -4.64148 | -0.99976 | C  | -5.28623 | -0.49302 | 2.18868  |
| O                  | 4.18523  | -0.42446 | 0.12504  | H  | -4.29542 | 0.36420  | 3.91195  |
| C                  | 5.04108  | -0.33220 | 1.26613  | H  | -5.99960 | -1.49395 | 0.40632  |
| H                  | 4.84909  | -1.15467 | 1.96971  | H  | -6.25072 | -0.02123 | 2.39076  |
| H                  | 6.09784  | -0.33839 | 0.95666  | O  | -3.68288 | -2.74119 | -0.29309 |
| H                  | 4.79629  | 0.62443  | 1.74258  | C  | -4.76090 | -2.99899 | -1.18079 |
| C                  | 1.55493  | 5.03931  | -0.34818 | H  | -5.15094 | -2.06704 | -1.62302 |
| C                  | 1.63997  | 4.18362  | -1.44642 | H  | -4.35566 | -3.63780 | -1.97592 |
| C                  | 2.39538  | 2.99581  | -1.40389 | C  | 0.50618  | 0.51193  | 2.45823  |
| C                  | 3.05931  | 2.67843  | -0.19495 | C  | 0.44261  | 1.50992  | 3.43140  |
| C                  | 2.97351  | 3.51227  | 0.90889  | C  | -0.56053 | 2.48294  | 3.33600  |
| C                  | 2.21645  | 4.69962  | 0.84368  | C  | -1.49963 | 2.43347  | 2.30396  |
| H                  | 1.11991  | 4.43816  | -2.37100 | C  | -1.40424 | 1.41255  | 1.35154  |
| H                  | 3.62146  | 1.74883  | -0.10927 | N  | -0.38650 | 0.51984  | 1.43374  |
| H                  | 3.46734  | 3.25504  | 1.84773  | H  | 1.16092  | 1.52784  | 4.25007  |
| C                  | 2.46278  | 2.14773  | -2.61146 | H  | -2.29824 | 3.17169  | 2.24141  |
| C                  | 3.45257  | 1.07205  | -2.67328 | Rh | -0.30127 | -0.88212 | 0.12748  |
| H                  | 3.66870  | 0.71236  | -3.68005 | C  | 1.42113  | -0.63618 | 2.40617  |
| H                  | 4.29670  | 1.08514  | -1.98370 | C  | 2.39529  | -0.91900 | 3.36788  |
| O                  | 1.72747  | 2.37092  | -3.61267 | C  | 3.14999  | -2.08572 | 3.25095  |
| H                  | 0.96125  | 5.95045  | -0.41925 | C  | 2.89719  | -2.95714 | 2.18659  |
| O                  | 2.16969  | 5.44208  | 1.98163  | C  | 1.92307  | -2.61643 | 1.25221  |
| C                  | 1.32288  | 6.58940  | 2.00387  | N  | 1.22115  | -1.47420 | 1.34116  |
| H                  | 1.39539  | 6.99731  | 3.01929  | H  | 3.91885  | -2.31788 | 3.98918  |
| H                  | 1.66042  | 7.34653  | 1.27796  | H  | 2.54905  | -0.23195 | 4.19952  |
| H                  | 0.27776  | 6.31290  | 1.79017  | H  | 3.45324  | -3.88704 | 2.06726  |
| <b>I-[2Rh]-IM4</b> |          |          |          | H  | 1.69026  | -3.25549 | 0.40001  |
| O                  | -0.22113 | -2.37087 | -1.33639 | C  | -2.70431 | -0.21859 | -1.63519 |
| O                  | 0.53671  | -0.96175 | -2.91160 | C  | -3.88483 | 0.46233  | -1.93029 |
| C                  | 0.05175  | -2.07854 | -2.54362 | C  | -4.28165 | 1.51954  | -1.10979 |
| C                  | -0.21693 | -3.12329 | -3.59117 | C  | -3.48151 | 1.86987  | -0.02177 |
| H                  | -1.27270 | -3.42850 | -3.54056 | C  | -2.30989 | 1.14963  | 0.22546  |
| H                  | 0.01978  | -2.74591 | -4.59287 | N  | -1.93233 | 0.11027  | -0.58898 |
| H                  | 0.39682  | -4.01108 | -3.37356 | H  | -5.20075 | 2.07021  | -1.31482 |
| O                  | 2.44457  | 1.20475  | -3.08548 | H  | -2.36514 | -1.05146 | -2.24883 |
| H                  | 3.28954  | 0.72603  | -3.03772 | H  | -4.47367 | 0.16112  | -2.79661 |
| O                  | -1.61189 | -2.26753 | 1.32533  | H  | -3.76229 | 2.69160  | 0.63548  |
| C                  | -2.77551 | -1.71844 | 1.62941  | H  | -0.61612 | 3.27676  | 4.08171  |
| C                  | -2.96269 | -0.88736 | 2.75739  | Rh | 1.30699  | 0.38767  | -1.50294 |
|                    |          |          |          | C  | 3.00875  | 3.16859  | 1.82669  |



|                     |          |          |          |    |          |          |          |
|---------------------|----------|----------|----------|----|----------|----------|----------|
| H                   | 1.62063  | -4.95527 | 1.54380  | C  | 1.88328  | 0.33170  | -2.70388 |
| H                   | -0.16282 | -3.89717 | 0.12976  | C  | 2.82765  | 0.23005  | -3.73039 |
| C                   | -4.28308 | -0.15997 | -1.09073 | C  | 3.57194  | -0.94598 | -3.85900 |
| C                   | -5.36074 | 0.71298  | -1.22735 | C  | 3.34316  | -2.01892 | -2.98950 |
| C                   | -5.50887 | 1.75461  | -0.30900 | C  | 2.40050  | -1.88385 | -1.96910 |
| C                   | -4.58706 | 1.87939  | 0.73109  | N  | 1.74466  | -0.69613 | -1.82283 |
| C                   | -3.53678 | 0.96323  | 0.83064  | H  | 2.96530  | 1.05282  | -4.43168 |
| N                   | -3.38599 | -0.03517 | -0.09916 | H  | 3.88876  | -2.95420 | -3.11028 |
| H                   | -6.33477 | 2.46195  | -0.39615 | Rh | 0.34564  | -0.61424 | -0.52650 |
| H                   | -4.12488 | -0.98515 | -1.78527 | C  | 0.94227  | 1.42443  | -2.45462 |
| H                   | -6.06229 | 0.57319  | -2.04997 | C  | 0.87569  | 2.59833  | -3.21059 |
| H                   | -4.68577 | 2.67387  | 1.46979  | C  | -0.08936 | 3.55855  | -2.90732 |
| O                   | 1.01594  | 0.81814  | -2.88961 | C  | -0.96515 | 3.31921  | -1.84497 |
| H                   | 2.24762  | 0.77150  | -2.60881 | C  | -0.85020 | 2.13545  | -1.11899 |
| H                   | 0.78364  | 1.76099  | -2.92179 | N  | 0.07485  | 1.20304  | -1.40844 |
| O                   | 3.36446  | 0.61678  | -2.33846 | H  | -0.15869 | 4.47558  | -3.49479 |
| C                   | 3.79869  | 1.50137  | -1.44199 | H  | 1.57282  | 2.75164  | -4.03413 |
| C                   | 3.15676  | 2.72491  | -1.16832 | H  | -1.74253 | 4.03242  | -1.57067 |
| C                   | 4.98198  | 1.19753  | -0.70276 | H  | -1.51646 | 1.90901  | -0.28617 |
| C                   | 3.65956  | 3.61513  | -0.20896 | C  | 0.70909  | -3.26663 | 0.93423  |
| H                   | 2.24704  | 2.97080  | -1.72038 | C  | 1.20444  | -4.56307 | 1.05365  |
| C                   | 5.47845  | 2.08506  | 0.25495  | C  | 2.11787  | -5.03661 | 0.10546  |
| C                   | 4.81649  | 3.30053  | 0.50505  | C  | 2.52491  | -4.18339 | -0.91749 |
| H                   | 3.13081  | 4.55251  | -0.01884 | C  | 2.00717  | -2.88464 | -0.97713 |
| H                   | 6.38201  | 1.83726  | 0.81368  | N  | 1.08981  | -2.44566 | -0.05923 |
| H                   | 5.21324  | 3.98607  | 1.25717  | H  | 2.50891  | -6.05372 | 0.16515  |
| O                   | 5.55993  | -0.00472 | -1.01919 | H  | 0.01209  | -2.85828 | 1.66269  |
| C                   | 6.66349  | -0.43644 | -0.23719 | H  | 0.86374  | -5.18552 | 1.88167  |
| H                   | 6.39792  | -0.49957 | 0.83174  | H  | 3.24436  | -4.51573 | -1.66587 |
| H                   | 6.92782  | -1.43543 | -0.60681 | H  | 4.31008  | -1.03931 | -4.65662 |
| H                   | 7.52913  | 0.23713  | -0.35605 | Rh | 1.94618  | 0.60135  | 1.27360  |
|                     |          |          |          | C  | 3.96001  | 3.79844  | -1.44551 |
|                     |          |          |          | C  | 4.51218  | 2.51636  | -1.35489 |
| <b>II-[2Rh]-IM1</b> |          |          |          | C  | 2.82107  | 4.12744  | -0.70111 |
| O                   | 3.14200  | 1.17962  | 2.83417  | C  | 3.89198  | 1.56507  | -0.53944 |
| H                   | 2.58494  | 1.67795  | 3.45539  | H  | 5.42523  | 2.26803  | -1.89583 |
| H                   | -1.08902 | -0.61813 | 0.76828  | C  | 2.22194  | 3.14890  | 0.09495  |
| H                   | -1.38336 | -1.18308 | 3.08218  | H  | 2.41027  | 5.13611  | -0.73651 |
| O                   | -0.16211 | -1.98399 | 3.85396  | N  | 2.74295  | 1.88973  | 0.10923  |
| O                   | 0.86287  | -0.71963 | 2.38877  | H  | 4.43557  | 4.55249  | -2.07414 |
| C                   | 0.86958  | -1.38091 | 3.49931  | C  | 4.35215  | 0.20847  | -0.22627 |
| C                   | 2.13686  | -1.46380 | 4.31733  | C  | 5.53364  | -0.36008 | -0.71101 |
| H                   | 2.63030  | -2.42561 | 4.09566  | C  | 5.90988  | -1.63303 | -0.28280 |
| H                   | 2.81538  | -0.63475 | 4.07033  | C  | 5.09718  | -2.30487 | 0.63490  |
| H                   | 1.88216  | -1.47734 | 5.38562  |    |          |          |          |

|   |          |          |          |                     |          |          |          |
|---|----------|----------|----------|---------------------|----------|----------|----------|
| C | 3.92420  | -1.69434 | 1.07409  | C                   | -6.92322 | -1.37094 | -1.36090 |
| N | 3.54418  | -0.48336 | 0.64183  | H                   | -7.76927 | -0.25774 | 0.29206  |
| H | 6.83368  | -2.08603 | -0.64656 | H                   | -5.88980 | -2.59889 | -2.80469 |
| H | 6.16053  | 0.19995  | -1.40470 | H                   | -7.70013 | -1.07954 | -2.07076 |
| H | 5.36182  | -3.29252 | 1.01361  | O                   | -3.87267 | -3.46332 | -1.19880 |
| H | 3.25327  | -2.17195 | 1.78665  | C                   | -3.66738 | -3.81064 | -2.55346 |
| C | -0.42645 | 2.13020  | 2.38083  | H                   | -4.49873 | -4.42263 | -2.94400 |
| C | -1.15624 | 3.29416  | 2.61569  | H                   | -3.54741 | -2.91127 | -3.18159 |
| C | -0.75437 | 4.49246  | 2.01647  | H                   | -2.73838 | -4.39260 | -2.57975 |
| C | 0.35877  | 4.48635  | 1.17830  | H                   | -2.36938 | -2.39478 | -0.07488 |
| C | 1.05186  | 3.29037  | 0.96420  |                     |          |          |          |
| N | 0.65647  | 2.12866  | 1.58221  |                     |          |          |          |
| H | -1.30297 | 5.41835  | 2.19726  | <b>II-[2Rh]-TS1</b> |          |          |          |
| H | -0.71997 | 1.16126  | 2.79433  | O                   | 3.18995  | 0.65485  | 2.98958  |
| H | -2.03042 | 3.25043  | 3.26468  | H                   | 2.82961  | 1.42333  | 3.46287  |
| H | 0.69432  | 5.40191  | 0.69092  | H                   | -0.97209 | -0.41766 | 0.63102  |
| O | -1.00811 | -1.63692 | -1.72370 | H                   | -1.31047 | -1.08188 | 3.35507  |
| H | -1.17205 | -1.09223 | -2.51122 | O                   | -0.51173 | -1.64363 | 4.08037  |
| C | -2.14736 | -0.73865 | 1.31539  | O                   | 0.77360  | -0.95759 | 2.43996  |
| O | -1.98339 | -0.49540 | 2.65210  | C                   | 0.65146  | -1.40617 | 3.62091  |
| C | -4.59774 | 2.16618  | 0.94037  | C                   | 1.84650  | -1.70675 | 4.47990  |
| C | -3.69482 | 1.24839  | 1.49292  | H                   | 2.25226  | -2.69135 | 4.19245  |
| C | -3.06183 | 0.28988  | 0.69888  | H                   | 2.61450  | -0.94049 | 4.28582  |
| C | -3.36286 | 0.24722  | -0.67751 | H                   | 1.55523  | -1.75561 | 5.53615  |
| C | -4.25471 | 1.14858  | -1.23919 | C                   | 1.61828  | 1.09281  | -2.65994 |
| C | -4.88557 | 2.11616  | -0.43236 | C                   | 2.53592  | 1.25409  | -3.70191 |
| H | -3.50395 | 1.24702  | 2.56622  | C                   | 3.34485  | 0.16954  | -4.06347 |
| H | -2.87280 | -0.50854 | -1.29474 | C                   | 3.21137  | -1.06033 | -3.41083 |
| H | -4.51096 | 1.10892  | -2.29865 | C                   | 2.28007  | -1.17776 | -2.37218 |
| H | -5.09037 | 2.88948  | 1.59065  | N                   | 1.55760  | -0.09460 | -2.00698 |
| O | -5.75248 | 2.94238  | -1.06518 | H                   | 2.61348  | 2.20196  | -4.23393 |
| C | -6.50551 | 3.85848  | -0.29093 | H                   | 3.81752  | -1.91431 | -3.71278 |
| H | -7.16506 | 4.38243  | -0.99321 | Rh                  | 0.20594  | -0.31422 | -0.60451 |
| H | -7.11585 | 3.33602  | 0.46542  | C                   | 0.62570  | 2.05801  | -2.17435 |
| H | -5.85407 | 4.59342  | 0.21440  | C                   | 0.45294  | 3.33910  | -2.71152 |
| C | -2.56454 | -2.18260 | 0.98365  | C                   | -0.56301 | 4.16145  | -2.23016 |
| H | -1.98390 | -2.87221 | 1.60978  | C                   | -1.39192 | 3.67426  | -1.21366 |
| O | -3.92381 | -2.41356 | 1.34421  | C                   | -1.16982 | 2.39931  | -0.70620 |
| C | -4.89895 | -2.10223 | 0.43316  | N                   | -0.18336 | 1.59865  | -1.15812 |
| C | -5.94957 | -1.28204 | 0.84686  | H                   | -0.71270 | 5.15824  | -2.64839 |
| C | -4.88951 | -2.61544 | -0.88704 | H                   | 1.10882  | 3.67810  | -3.51360 |
| C | -6.96213 | -0.91226 | -0.04283 | H                   | -2.20971 | 4.26894  | -0.80674 |
| H | -5.92942 | -0.91749 | 1.87472  | H                   | -1.79261 | 1.98520  | 0.08439  |
| C | -5.89507 | -2.22400 | -1.78065 | C                   | 0.70807  | -3.21651 | 0.20607  |
|   |          |          |          | C                   | 1.21796  | -4.49963 | 0.00946  |

|    |          |          |          |                     |          |          |          |
|----|----------|----------|----------|---------------------|----------|----------|----------|
| C  | 2.13023  | -4.71615 | -1.02581 | C                   | -3.81718 | 1.34574  | 1.53669  |
| C  | 2.50900  | -3.63426 | -1.81960 | C                   | -3.20154 | 0.32647  | 0.79728  |
| C  | 1.95444  | -2.37289 | -1.58219 | C                   | -3.52288 | 0.18591  | -0.56956 |
| N  | 1.04851  | -2.17715 | -0.56915 | C                   | -4.42612 | 1.04515  | -1.17301 |
| H  | 2.54309  | -5.70918 | -1.21097 | C                   | -5.04868 | 2.06335  | -0.42223 |
| H  | 0.01226  | -2.99167 | 1.00855  | H                   | -3.58781 | 1.43141  | 2.59992  |
| H  | 0.89247  | -5.31009 | 0.66273  | H                   | -3.00471 | -0.57593 | -1.15637 |
| H  | 3.22270  | -3.76661 | -2.63258 | H                   | -4.68952 | 0.94300  | -2.22648 |
| H  | 4.06702  | 0.27831  | -4.87399 | H                   | -5.21645 | 2.98461  | 1.54489  |
| Rh | 1.98817  | 0.32550  | 1.34331  | O                   | -5.92729 | 2.83996  | -1.09271 |
| C  | 4.53771  | 3.16296  | -1.30893 | C                   | -6.64603 | 3.83475  | -0.38268 |
| C  | 4.89075  | 1.81273  | -1.18658 | H                   | -7.31343 | 4.30724  | -1.11312 |
| C  | 3.42918  | 3.66291  | -0.61940 | H                   | -7.24587 | 3.39109  | 0.42977  |
| C  | 4.10528  | 0.97121  | -0.39849 | H                   | -5.96853 | 4.59718  | 0.03994  |
| H  | 5.77812  | 1.42640  | -1.68737 | C                   | -2.40304 | -2.09308 | 1.10340  |
| C  | 2.65960  | 2.79345  | 0.16020  | H                   | -1.72543 | -2.67129 | 1.74321  |
| H  | 3.17067  | 4.72005  | -0.67910 | O                   | -3.71617 | -2.55343 | 1.43372  |
| N  | 2.98741  | 1.47218  | 0.20538  | C                   | -4.69522 | -2.36763 | 0.49005  |
| H  | 5.14534  | 3.83081  | -1.92090 | C                   | -5.84680 | -1.66891 | 0.85258  |
| C  | 4.34560  | -0.43424 | -0.06635 | C                   | -4.56161 | -2.88104 | -0.82266 |
| C  | 5.45139  | -1.18155 | -0.49057 | C                   | -6.85401 | -1.42359 | -0.08482 |
| C  | 5.61573  | -2.48540 | -0.03036 | H                   | -5.91237 | -1.29542 | 1.87562  |
| C  | 4.67572  | -3.01231 | 0.86532  | C                   | -5.56037 | -2.60489 | -1.76593 |
| C  | 3.59080  | -2.23004 | 1.24192  | C                   | -6.69852 | -1.87742 | -1.39655 |
| N  | 3.40724  | -0.98598 | 0.76706  | H                   | -7.74620 | -0.86592 | 0.20591  |
| H  | 6.47619  | -3.07727 | -0.34685 | H                   | -5.46131 | -2.97141 | -2.78808 |
| H  | 6.18429  | -0.73178 | -1.16061 | H                   | -7.46965 | -1.67772 | -2.14354 |
| H  | 4.77971  | -4.01947 | 1.26973  | O                   | -3.44194 | -3.60909 | -1.07264 |
| H  | 2.82689  | -2.58268 | 1.93188  | C                   | -3.10673 | -3.90408 | -2.41756 |
| C  | -0.17258 | 2.19633  | 2.37121  | H                   | -3.86288 | -4.55639 | -2.88648 |
| C  | -0.73824 | 3.45430  | 2.57262  | H                   | -2.98197 | -2.97850 | -3.00181 |
| C  | -0.15189 | 4.57515  | 1.97458  | H                   | -2.14530 | -4.43026 | -2.37828 |
| C  | 0.96861  | 4.39842  | 1.16506  | H                   | -2.16759 | -2.25275 | 0.04439  |
| C  | 1.49400  | 3.11377  | 0.98681  |                     |          |          |          |
| N  | 0.92477  | 2.02898  | 1.61191  | <b>II-[2Rh]-IM2</b> |          |          |          |
| H  | -0.56784 | 5.57220  | 2.12880  | O                   | 3.02146  | 0.83355  | 3.07206  |
| H  | -0.61194 | 1.28756  | 2.78938  | H                   | 2.70771  | 1.67159  | 3.45055  |
| H  | -1.62879 | 3.54213  | 3.19554  | H                   | -0.72081 | -0.34732 | 0.58595  |
| H  | 1.44057  | 5.24953  | 0.67425  | H                   | -1.34223 | -1.06233 | 3.86436  |
| O  | -1.13945 | -1.19771 | -1.92114 | O                   | -0.56403 | -1.41611 | 4.43990  |
| H  | -1.38370 | -0.51820 | -2.57112 | O                   | 0.56600  | -0.70984 | 2.68348  |
| C  | -2.28125 | -0.61882 | 1.48350  | C                   | 0.56836  | -1.17079 | 3.84234  |
| O  | -1.99310 | -0.32067 | 2.70542  | C                   | 1.80686  | -1.49357 | 4.61715  |
| C  | -4.73425 | 2.21609  | 0.94047  | H                   | 2.16727  | -2.49111 | 4.31633  |

|    |          |          |          |   |          |          |          |
|----|----------|----------|----------|---|----------|----------|----------|
| H  | 2.56706  | -0.73779 | 4.35650  | C | 5.47151  | -2.48461 | 0.20750  |
| H  | 1.58823  | -1.52217 | 5.69143  | C | 4.49926  | -2.98353 | 1.08459  |
| C  | 1.66525  | 1.06874  | -2.77539 | C | 3.41561  | -2.18052 | 1.41686  |
| C  | 2.63856  | 1.24237  | -3.76329 | N | 3.26030  | -0.94038 | 0.92112  |
| C  | 3.49990  | 0.17383  | -4.05459 | H | 6.33335  | -3.09220 | -0.07321 |
| C  | 3.37346  | -1.04848 | -3.38245 | H | 6.08003  | -0.76573 | -0.95388 |
| C  | 2.38137  | -1.17759 | -2.40226 | H | 4.57616  | -3.98582 | 1.50666  |
| N  | 1.59388  | -0.11564 | -2.11886 | H | 2.62925  | -2.52039 | 2.08721  |
| H  | 2.72919  | 2.18451  | -4.30436 | C | -0.36720 | 2.30350  | 2.27082  |
| H  | 4.03362  | -1.88150 | -3.62611 | C | -0.95654 | 3.56142  | 2.37619  |
| Rh | 0.25093  | -0.29999 | -0.66313 | C | -0.36672 | 4.65282  | 1.72788  |
| C  | 0.62888  | 2.01388  | -2.33460 | C | 0.78263  | 4.44593  | 0.96773  |
| C  | 0.39864  | 3.25999  | -2.93106 | C | 1.33112  | 3.16127  | 0.88574  |
| C  | -0.66600 | 4.05065  | -2.50430 | N | 0.75797  | 2.10912  | 1.55967  |
| C  | -1.49165 | 3.57092  | -1.47988 | H | -0.80292 | 5.65004  | 1.80579  |
| C  | -1.20797 | 2.33979  | -0.90153 | H | -0.79347 | 1.41680  | 2.74383  |
| N  | -0.16961 | 1.57271  | -1.29714 | H | -1.86728 | 3.67466  | 2.96439  |
| H  | -0.85999 | 5.01591  | -2.97511 | H | 1.25628  | 5.27245  | 0.43816  |
| H  | 1.04348  | 3.59121  | -3.74556 | O | -1.27657 | -1.15309 | -1.76401 |
| H  | -2.35200 | 4.13872  | -1.12565 | H | -1.64319 | -0.44537 | -2.31871 |
| H  | -1.81125 | 1.92904  | -0.09411 | C | -2.75865 | -0.59477 | 1.89708  |
| C  | 0.68205  | -3.19573 | 0.12751  | O | -2.38452 | -0.28220 | 3.04198  |
| C  | 1.20773  | -4.47694 | -0.02553 | C | -4.70864 | 2.49349  | 0.97047  |
| C  | 2.19163  | -4.69635 | -0.99529 | C | -4.01032 | 1.53459  | 1.69832  |
| C  | 2.60984  | -3.62244 | -1.77900 | C | -3.50848 | 0.37218  | 1.08319  |
| C  | 2.03848  | -2.35817 | -1.59384 | C | -3.72630 | 0.18653  | -0.30077 |
| N  | 1.07828  | -2.15589 | -0.62567 | C | -4.41876 | 1.13668  | -1.03669 |
| H  | 2.62149  | -5.68853 | -1.14259 | C | -4.91737 | 2.29554  | -0.41108 |
| H  | -0.08471 | -2.97051 | 0.86479  | H | -3.85065 | 1.66234  | 2.77076  |
| H  | 0.83833  | -5.28607 | 0.60583  | H | -3.28296 | -0.66808 | -0.81326 |
| H  | 3.36582  | -3.76218 | -2.55191 | H | -4.58782 | 1.00984  | -2.10671 |
| H  | 4.26674  | 0.29221  | -4.82166 | H | -5.10135 | 3.37590  | 1.47586  |
| Rh | 1.83960  | 0.41065  | 1.42038  | O | -5.56501 | 3.16844  | -1.20928 |
| C  | 4.45319  | 3.11420  | -1.30100 | C | -6.15984 | 4.32363  | -0.63628 |
| C  | 4.80394  | 1.77276  | -1.10458 | H | -6.65196 | 4.85097  | -1.46178 |
| C  | 3.31805  | 3.63947  | -0.67766 | H | -6.90949 | 4.05040  | 0.12448  |
| C  | 3.99262  | 0.96484  | -0.30765 | H | -5.40035 | 4.98293  | -0.18154 |
| H  | 5.70897  | 1.36677  | -1.55532 | C | -2.55648 | -2.00520 | 1.37255  |
| C  | 2.52301  | 2.80398  | 0.11324  | H | -1.87044 | -2.53430 | 2.04606  |
| H  | 3.05819  | 4.69138  | -0.79491 | O | -3.81631 | -2.68774 | 1.44473  |
| N  | 2.85272  | 1.48694  | 0.23182  | C | -4.56161 | -2.71398 | 0.29225  |
| H  | 5.08078  | 3.75565  | -1.92091 | C | -5.85162 | -2.18525 | 0.31390  |
| C  | 4.22060  | -0.42463 | 0.09027  | C | -4.04055 | -3.27717 | -0.89798 |
| C  | 5.33027  | -1.19155 | -0.28701 | C | -6.63273 | -2.16915 | -0.84637 |

|                     |          |          |          |    |          |          |          |
|---------------------|----------|----------|----------|----|----------|----------|----------|
| H                   | -6.21402 | -1.76654 | 1.25423  | H  | 6.82990  | -3.67710 | -0.52046 |
| C                   | -4.81184 | -3.21620 | -2.06682 | H  | 7.04023  | 0.55362  | -1.36021 |
| C                   | -6.10071 | -2.66763 | -2.03665 | H  | 8.14480  | -1.55392 | -0.66591 |
| H                   | -7.64068 | -1.75114 | -0.82090 | O  | 4.39086  | 0.74673  | -1.98729 |
| H                   | -4.41830 | -3.61558 | -3.00149 | C  | 5.07771  | 1.99134  | -2.06235 |
| H                   | -6.68991 | -2.64293 | -2.95589 | H  | 5.52271  | 2.25879  | -1.09065 |
| O                   | -2.80862 | -3.83998 | -0.81050 | H  | 5.86508  | 1.96168  | -2.83324 |
| C                   | -2.14685 | -4.18298 | -2.02006 | H  | 4.32144  | 2.73711  | -2.33690 |
| H                   | -2.71483 | -4.94199 | -2.58398 | H  | 1.14177  | -1.19165 | -0.79948 |
| H                   | -1.97237 | -3.27830 | -2.62288 | O  | 2.63048  | -2.24930 | 1.13256  |
| H                   | -1.18024 | -4.60676 | -1.72213 | H  | 6.65310  | -0.40168 | 3.12115  |
| H                   | -2.15254 | -1.99489 | 0.35013  | O  | 6.73893  | 2.30938  | 2.81128  |
| <b>II-[2Rh]-TS2</b> |          |          |          | C  | 7.86160  | 1.78268  | 3.52209  |
| O                   | -2.48790 | -0.92627 | -3.35717 | H  | 8.42978  | 1.08040  | 2.89199  |
| H                   | -1.66884 | -1.03841 | -3.86946 | H  | 8.48868  | 2.64686  | 3.77090  |
| H                   | 1.93567  | -2.67288 | -2.03621 | H  | 7.54067  | 1.27875  | 4.44725  |
| O                   | 1.25772  | -3.39529 | -2.30678 | H  | 0.84278  | 0.09606  | 0.48641  |
| O                   | -0.30996 | -1.94341 | -1.68648 | C  | -2.97017 | 1.48679  | 2.10056  |
| C                   | -0.00301 | -3.04417 | -2.16335 | C  | -4.18916 | 1.65042  | 2.77021  |
| C                   | -1.00599 | -4.07416 | -2.56870 | C  | -4.82578 | 0.51869  | 3.28830  |
| H                   | -1.30053 | -4.63292 | -1.66511 | C  | -4.24204 | -0.74877 | 3.16505  |
| H                   | -1.89388 | -3.57329 | -2.97352 | C  | -3.03052 | -0.86292 | 2.47797  |
| H                   | -0.58019 | -4.77686 | -3.29485 | N  | -2.46453 | 0.24289  | 1.94191  |
| C                   | 5.82866  | 0.06047  | 2.57928  | H  | -4.62781 | 2.64053  | 2.88966  |
| C                   | 4.80335  | -0.73102 | 2.07322  | H  | -4.72465 | -1.62708 | 3.59239  |
| C                   | 3.74330  | -0.17181 | 1.33504  | Rh | -0.69708 | 0.08239  | 1.08188  |
| C                   | 3.71388  | 1.22651  | 1.14105  | C  | -2.10356 | 2.53402  | 1.53927  |
| C                   | 4.71563  | 2.03108  | 1.66266  | C  | -2.39712 | 3.89860  | 1.59003  |
| C                   | 5.78970  | 1.45326  | 2.37039  | C  | -1.49597 | 4.81910  | 1.05302  |
| H                   | 4.82884  | -1.81250 | 2.21686  | C  | -0.31371 | 4.34951  | 0.47700  |
| H                   | 2.89560  | 1.69010  | 0.58931  | C  | -0.07213 | 2.97743  | 0.44699  |
| H                   | 4.69912  | 3.11362  | 1.52723  | N  | -0.93916 | 2.08353  | 0.95631  |
| C                   | 2.75166  | -1.08418 | 0.73898  | H  | -1.71723 | 5.88683  | 1.08415  |
| C                   | 1.99986  | -0.62802 | -0.47255 | H  | -3.32779 | 4.23208  | 2.04841  |
| H                   | 2.16506  | 0.36823  | -0.86966 | H  | 0.41966  | 5.02955  | 0.04293  |
| O                   | 3.00530  | -1.51290 | -1.74568 | H  | 0.83171  | 2.56448  | 0.00011  |
| C                   | 4.33242  | -1.55826 | -1.51771 | C  | -0.35443 | -2.98382 | 1.19472  |
| C                   | 4.97512  | -2.73963 | -1.12284 | C  | -0.72099 | -4.27585 | 1.56424  |
| C                   | 5.09382  | -0.35898 | -1.61190 | C  | -1.88618 | -4.46661 | 2.31220  |
| C                   | 6.34545  | -2.74726 | -0.82706 | C  | -2.65092 | -3.35336 | 2.65225  |
| H                   | 4.37322  | -3.64699 | -1.03630 | C  | -2.24947 | -2.08230 | 2.22698  |
| C                   | 6.45738  | -0.36614 | -1.30184 | N  | -1.09275 | -1.90375 | 1.50721  |
| C                   | 7.07972  | -1.56190 | -0.90816 | H  | -2.19582 | -5.46516 | 2.62444  |
|                     |          |          |          | H  | 0.57481  | -2.79861 | 0.65997  |

|              |          |          |          |    |           |          |          |
|--------------|----------|----------|----------|----|-----------|----------|----------|
| H            | -0.08564 | -5.11280 | 1.27241  | H  | -2.74127  | -2.19005 | 0.95140  |
| H            | -3.57111 | -3.46209 | 3.22565  | Rh | 1.07590   | 1.05114  | 1.00178  |
| H            | -5.77888 | 0.62561  | 3.80770  | C  | -0.90175  | 2.64232  | -0.33690 |
| Rh           | -1.72888 | -0.34220 | -1.44208 | C  | -1.51483  | 3.69888  | -1.01175 |
| C            | -4.34478 | 3.49870  | -1.17927 | C  | -0.79305  | 4.87179  | -1.24615 |
| C            | -4.84934 | 2.28303  | -0.71189 | C  | 0.52537   | 4.96580  | -0.79754 |
| C            | -3.06098 | 3.56050  | -1.73265 | C  | 1.08695   | 3.87940  | -0.12653 |
| C            | -4.04564 | 1.14115  | -0.78046 | N  | 0.39366   | 2.75541  | 0.09480  |
| H            | -5.85641 | 2.21715  | -0.30171 | H  | -1.26074  | 5.70322  | -1.77568 |
| C            | -2.28230 | 2.40316  | -1.77915 | H  | -2.54483  | 3.60007  | -1.35386 |
| H            | -2.66876 | 4.49784  | -2.12459 | H  | 1.12097   | 5.86434  | -0.96074 |
| N            | -2.77824 | 1.23752  | -1.26822 | H  | 2.11159   | 3.88798  | 0.24845  |
| H            | -4.95729 | 4.39914  | -1.12596 | C  | 2.16215   | -1.44725 | 2.37268  |
| C            | -4.40852 | -0.22810 | -0.41328 | C  | 2.09299   | -2.76060 | 2.83384  |
| C            | -5.66261 | -0.61679 | 0.06350  | C  | 0.90421   | -3.47284 | 2.66209  |
| C            | -5.90457 | -1.96525 | 0.32917  | C  | -0.18048  | -2.85294 | 2.03907  |
| C            | -4.88650 | -2.89455 | 0.10349  | C  | -0.05279  | -1.53342 | 1.59964  |
| C            | -3.65166 | -2.44675 | -0.36290 | N  | 1.12161   | -0.85393 | 1.77367  |
| N            | -3.40908 | -1.14936 | -0.60583 | H  | 0.81855   | -4.50354 | 3.00963  |
| H            | -6.87773 | -2.28442 | 0.70486  | H  | 3.06294   | -0.84284 | 2.48635  |
| H            | -6.43942 | 0.13094  | 0.21883  | H  | 2.96204   | -3.20803 | 3.31681  |
| H            | -5.03096 | -3.95781 | 0.29588  | H  | -1.11883  | -3.38661 | 1.89032  |
| H            | -2.82312 | -3.13148 | -0.54124 | O  | 0.43691   | 1.71426  | 2.72818  |
| C            | 0.72177  | 0.70482  | -2.92114 | H  | 1.29286   | 2.04228  | 3.07029  |
| C            | 1.48043  | 1.69182  | -3.54194 | O  | 2.86483   | 1.79588  | 1.54420  |
| C            | 1.00674  | 3.00866  | -3.55319 | H  | 3.49689   | 1.05778  | 1.55757  |
| C            | -0.22884 | 3.28511  | -2.97268 | C  | -4.69310  | -0.75603 | -0.32134 |
| C            | -0.95029 | 2.25180  | -2.36399 | C  | -5.74182  | 0.17330  | -0.45454 |
| N            | -0.44692 | 0.97563  | -2.30994 | C  | -5.00171  | -2.12440 | -0.49297 |
| H            | 1.58474  | 3.80604  | -4.02268 | C  | -7.04716  | -0.22941 | -0.73988 |
| H            | 1.05034  | -0.33276 | -2.89714 | H  | -5.54996  | 1.23799  | -0.30820 |
| H            | 2.43226  | 1.42135  | -3.99891 | C  | -6.29365  | -2.53970 | -0.78528 |
| H            | -0.63924 | 4.29452  | -2.98721 | H  | -4.21403  | -2.87678 | -0.42235 |
| O            | 0.28939  | 0.29467  | 2.93516  | C  | -7.33073  | -1.59555 | -0.90880 |
| H            | 1.17154  | 0.60844  | 2.67531  | H  | -7.83208  | 0.52212  | -0.82092 |
|              |          |          |          | H  | -6.52444  | -3.59661 | -0.93019 |
|              |          |          |          | O  | -8.56203  | -2.09195 | -1.19020 |
| <b>b-TS1</b> |          |          |          | C  | -9.64949  | -1.17807 | -1.32963 |
| C            | -1.55549 | 1.34861  | -0.04785 | H  | -9.46952  | -0.47250 | -2.15643 |
| C            | -2.86240 | 0.97110  | -0.35192 | H  | -10.52963 | -1.79202 | -1.55539 |
| C            | -3.31683 | -0.32220 | -0.00911 | H  | -9.81872  | -0.61967 | -0.39508 |
| C            | -2.42027 | -1.19596 | 0.64403  | H  | 1.95329   | 0.18153  | -1.42603 |
| C            | -1.12285 | -0.77250 | 0.92367  | O  | 1.18274   | 0.72134  | -1.89289 |
| N            | -0.73753 | 0.46938  | 0.56699  | H  | 1.49810   | 1.63680  | -1.84772 |
| H            | -3.51784 | 1.66853  | -0.87178 |    |           |          |          |



|              |          |          |          |              |          |          |          |
|--------------|----------|----------|----------|--------------|----------|----------|----------|
| C            | 4.39170  | 1.15874  | -1.49312 | N            | 1.27018  | 2.85562  | -0.16571 |
| H            | 4.10017  | 1.01111  | -2.54605 | H            | -0.29609 | 6.20291  | 0.95810  |
| H            | 3.72950  | 1.91751  | -1.04803 | H            | 3.10549  | 3.78997  | -0.22395 |
| H            | 5.42472  | 1.54177  | -1.46684 | H            | 2.17766  | 6.02530  | 0.49894  |
| C            | 4.24225  | -0.16800 | -0.71747 | H            | -1.72906 | 4.17479  | 0.67953  |
| H            | 4.59394  | 0.04665  | 0.32500  | C            | -4.15052 | -0.12118 | -0.00254 |
| O            | 2.94146  | -0.63968 | -0.72644 | C            | -4.80138 | -1.13401 | -0.73144 |
| C            | 4.80346  | -2.30182 | -1.99544 | C            | -4.91999 | 0.62550  | 0.91722  |
| C            | 5.24652  | -1.19051 | -1.26521 | C            | -6.16087 | -1.40069 | -0.56336 |
| C            | 6.62875  | -1.03287 | -1.05919 | H            | -4.24662 | -1.71736 | -1.46889 |
| C            | 7.54249  | -1.95522 | -1.57832 | C            | -6.27182 | 0.36632  | 1.10157  |
| C            | 7.08779  | -3.05790 | -2.31512 | H            | -4.44806 | 1.40467  | 1.51868  |
| C            | 5.71413  | -3.22820 | -2.51989 | C            | -6.90602 | -0.64971 | 0.36161  |
| H            | 3.72786  | -2.42931 | -2.13522 | H            | -6.62879 | -2.18507 | -1.15773 |
| H            | 6.99232  | -0.17852 | -0.47948 | H            | -6.85932 | 0.93553  | 1.82424  |
| H            | 8.61322  | -1.81744 | -1.40530 | O            | -8.22918 | -0.83335 | 0.60504  |
| H            | 7.80040  | -3.78073 | -2.72021 | C            | -8.91587 | -1.86052 | -0.10963 |
| H            | 5.34916  | -4.08843 | -3.08780 | H            | -8.47739 | -2.84923 | 0.10067  |
|              |          |          |          | H            | -9.95189 | -1.83382 | 0.24879  |
| <b>b-IM1</b> |          |          |          | H            | -8.89579 | -1.66886 | -1.19446 |
| C            | -0.47970 | -0.59501 | -0.78566 | H            | 0.68619  | -0.75058 | 1.55344  |
| C            | -1.83588 | -0.87085 | -0.62323 | C            | 1.68680  | -0.46481 | 1.94185  |
| C            | -2.71120 | 0.14980  | -0.19069 | O            | 2.14501  | 0.71723  | 1.34499  |
| C            | -2.17624 | 1.43170  | 0.06287  | C            | 1.52208  | -0.21612 | 3.44763  |
| C            | -0.81282 | 1.65969  | -0.11913 | H            | 2.49030  | 0.06810  | 3.89135  |
| N            | -0.02018 | 0.64997  | -0.53524 | H            | 0.80485  | 0.60364  | 3.61327  |
| H            | -2.20839 | -1.87885 | -0.79947 | H            | 1.15357  | -1.11678 | 3.96357  |
| H            | -2.82379 | 2.24740  | 0.38165  | C            | 3.98925  | -1.48994 | 1.55749  |
| Rh           | 1.89289  | 0.97471  | -0.66668 | C            | 2.60451  | -1.66129 | 1.70441  |
| C            | 0.59393  | -1.53199 | -1.17734 | C            | 2.07644  | -2.96011 | 1.64111  |
| C            | 0.38956  | -2.86803 | -1.52940 | C            | 2.90960  | -4.06367 | 1.42891  |
| C            | 1.48557  | -3.65541 | -1.88623 | C            | 4.28992  | -3.88189 | 1.27785  |
| C            | 2.76341  | -3.09199 | -1.88364 | C            | 4.82658  | -2.59027 | 1.34484  |
| C            | 2.90853  | -1.75631 | -1.51334 | H            | 4.40646  | -0.48137 | 1.58711  |
| N            | 1.85612  | -1.00132 | -1.16934 | H            | 0.99634  | -3.10381 | 1.74022  |
| H            | 1.33987  | -4.70074 | -2.16278 | H            | 2.47996  | -5.06675 | 1.36727  |
| H            | -0.61777 | -3.28363 | -1.52485 | H            | 4.94195  | -4.74084 | 1.10157  |
| H            | 3.64430  | -3.67378 | -2.15513 | H            | 5.90231  | -2.43888 | 1.22297  |
| H            | 3.87876  | -1.26009 | -1.47945 | O            | 1.74640  | 1.43413  | -2.64476 |
| C            | 2.04389  | 3.93804  | -0.01656 | H            | 2.41518  | 0.86496  | -3.06219 |
| C            | 1.51721  | 5.16494  | 0.38646  | O            | 3.89395  | 1.31243  | -0.75830 |
| C            | 0.14719  | 5.25770  | 0.64067  | H            | 4.10604  | 1.31574  | 0.19200  |
| C            | -0.65761 | 4.12641  | 0.48667  |              |          |          |          |
| C            | -0.07431 | 2.92402  | 0.08135  | <b>b-TS2</b> |          |          |          |

|    |          |          |          |                     |          |          |          |
|----|----------|----------|----------|---------------------|----------|----------|----------|
| O  | -3.72148 | 1.67293  | -0.95649 | H                   | -3.78433 | -3.18905 | -2.38455 |
| H  | -3.80332 | 2.61736  | -1.17319 | H                   | 0.42387  | -3.16935 | -1.38164 |
| C  | 4.17978  | -0.25598 | 0.03808  | O                   | -1.39548 | 1.88076  | -2.50526 |
| C  | 4.74773  | -1.31592 | -0.69367 | H                   | -2.31460 | 2.02296  | -2.80797 |
| C  | 5.01270  | 0.43905  | 0.94346  | C                   | -2.55795 | -0.60547 | 2.06110  |
| C  | 6.08734  | -1.67600 | -0.54373 | O                   | -1.19267 | -0.57471 | 2.16976  |
| H  | 4.14357  | -1.86252 | -1.42022 | H                   | -2.96451 | 0.13301  | 1.30704  |
| C  | 6.34534  | 0.08675  | 1.10983  | C                   | -3.25282 | -0.21716 | 3.39244  |
| H  | 4.60648  | 1.25182  | 1.54844  | H                   | -4.35436 | -0.21415 | 3.32693  |
| C  | 6.89675  | -0.97370 | 0.36553  | H                   | -2.91774 | 0.78976  | 3.69346  |
| H  | 6.49093  | -2.49416 | -1.13968 | H                   | -2.94809 | -0.92771 | 4.18048  |
| H  | 6.98168  | 0.61676  | 1.82083  | C                   | -4.94048 | -3.34842 | 0.74852  |
| O  | 8.20750  | -1.24552 | 0.58906  | C                   | -4.44847 | -2.10366 | 1.15422  |
| C  | 8.81368  | -2.31590 | -0.13514 | C                   | -3.11855 | -1.95872 | 1.59007  |
| H  | 8.78722  | -2.12412 | -1.21979 | C                   | -2.29298 | -3.09089 | 1.59368  |
| H  | 9.85520  | -2.35616 | 0.20555  | C                   | -2.77928 | -4.34134 | 1.19154  |
| H  | 8.31558  | -3.27371 | 0.08476  | C                   | -4.10682 | -4.47585 | 0.76967  |
| C  | 0.97713  | 1.75602  | -0.03849 | H                   | -5.10248 | -1.22623 | 1.12348  |
| C  | 2.32178  | 1.43168  | 0.13142  | H                   | -1.25528 | -2.95413 | 1.90728  |
| C  | 2.76205  | 0.11659  | -0.13542 | H                   | -2.11812 | -5.21247 | 1.19956  |
| C  | 1.81242  | -0.83422 | -0.57034 | H                   | -5.97527 | -3.44112 | 0.40753  |
| C  | 0.48005  | -0.45924 | -0.72814 | H                   | -4.48842 | -5.44836 | 0.44850  |
| N  | 0.11465  | 0.81332  | -0.46674 |                     |          |          |          |
| H  | 3.02621  | 2.19616  | 0.45543  |                     |          |          |          |
| H  | 2.10957  | -1.86415 | -0.76130 | <b>acetophenone</b> |          |          |          |
| Rh | -1.77019 | 1.28534  | -0.68529 | C                   | 0.42653  | 1.19944  | -0.00002 |
| C  | 0.32400  | 3.05386  | 0.22567  | C                   | -0.21002 | -0.05586 | 0.00001  |
| C  | 0.99473  | 4.19255  | 0.67449  | C                   | 0.57448  | -1.22488 | -0.00000 |
| C  | 0.27078  | 5.36140  | 0.91876  | C                   | 1.96617  | -1.14292 | -0.00003 |
| C  | -1.10982 | 5.36601  | 0.71294  | C                   | 2.59213  | 0.11135  | -0.00006 |
| C  | -1.72603 | 4.19947  | 0.26232  | C                   | 1.82161  | 1.27987  | -0.00005 |
| N  | -1.03080 | 3.07847  | 0.02369  | H                   | -0.16200 | 2.11822  | -0.00001 |
| H  | 0.78397  | 6.25837  | 1.26885  | H                   | 0.07060  | -2.19316 | 0.00001  |
| H  | 2.07245  | 4.16078  | 0.83216  | H                   | 2.56760  | -2.05467 | -0.00004 |
| H  | -1.71166 | 6.25671  | 0.89500  | H                   | 3.68261  | 0.17717  | -0.00008 |
| H  | -2.80144 | 4.14477  | 0.08776  | H                   | 2.30908  | 2.25713  | -0.00006 |
| C  | -2.93379 | -1.32880 | -1.71392 | C                   | -1.69838 | -0.19621 | 0.00004  |
| C  | -2.88013 | -2.68118 | -2.04987 | C                   | -2.54954 | 1.04729  | 0.00005  |
| C  | -1.66503 | -3.35600 | -1.92736 | H                   | -2.33151 | 1.66347  | -0.88661 |
| C  | -0.53463 | -2.66209 | -1.48818 | H                   | -3.60873 | 0.76132  | 0.00006  |
| C  | -0.64409 | -1.30661 | -1.17667 | H                   | -2.33149 | 1.66348  | 0.88670  |
| N  | -1.84809 | -0.66549 | -1.29839 | O                   | -2.21676 | -1.31269 | 0.00005  |
| H  | -1.59270 | -4.41718 | -2.16969 |                     |          |          |          |
| H  | -3.85142 | -0.74299 | -1.78044 | <b>e-TS1</b>        |          |          |          |
|    |          |          |          | C                   | 0.08611  | 1.17236  | -0.02027 |

|    |          |          |          |                   |          |          |          |
|----|----------|----------|----------|-------------------|----------|----------|----------|
| C  | 1.47850  | 1.12262  | -0.00163 | H                 | 8.41574  | 1.49694  | 0.40210  |
| C  | 2.13688  | -0.12610 | -0.03273 | H                 | 9.64613  | 0.24054  | 0.03522  |
| C  | 1.34958  | -1.29590 | -0.10780 | H                 | 8.49256  | 0.75964  | -1.23990 |
| C  | -0.03979 | -1.19413 | -0.11999 | H                 | -2.92207 | 0.00234  | 2.62117  |
| N  | -0.61923 | 0.02364  | -0.05868 | H                 | -1.88056 | 1.07159  | 2.86816  |
| H  | 2.05212  | 2.04556  | 0.06471  | O                 | -3.54286 | -0.76729 | 2.42222  |
| H  | 1.81868  | -2.27652 | -0.17000 | H                 | -4.15925 | -0.39891 | 1.73985  |
| Rh | -2.57475 | 0.11185  | -0.02535 |                   |          |          |          |
| C  | -0.76692 | 2.37641  | 0.00416  |                   |          |          |          |
| C  | -0.27007 | 3.68111  | 0.00829  | <b>I-[Ir]-IM1</b> |          |          |          |
| C  | -1.16343 | 4.75414  | 0.01279  | O                 | -2.89521 | 1.62710  | -0.54438 |
| C  | -2.53477 | 4.49752  | 0.00886  | H                 | -2.82305 | 1.52969  | -1.50960 |
| C  | -2.97106 | 3.17288  | 0.00767  | H                 | -1.43048 | 1.83126  | -0.06195 |
| N  | -2.11540 | 2.14284  | 0.01053  | C                 | 3.82073  | -0.02103 | -1.10772 |
| H  | -0.78801 | 5.77851  | 0.01615  | C                 | 2.53699  | 0.41998  | -1.44970 |
| H  | 0.80568  | 3.85411  | 0.00608  | C                 | 1.66228  | 0.95128  | -0.49285 |
| H  | -3.26779 | 5.30470  | 0.00823  | C                 | 2.08554  | 0.97566  | 0.84543  |
| H  | -4.03310 | 2.92599  | 0.01015  | C                 | 3.35362  | 0.52509  | 1.20822  |
| C  | -3.30900 | -2.82509 | -0.21049 | C                 | 4.23799  | 0.04038  | 0.22945  |
| C  | -3.03147 | -4.18825 | -0.30088 | H                 | 2.22554  | 0.35798  | -2.49560 |
| C  | -1.69897 | -4.60442 | -0.33186 | H                 | 1.41206  | 1.36452  | 1.60946  |
| C  | -0.68121 | -3.65007 | -0.27391 | H                 | 3.68394  | 0.55383  | 2.24846  |
| C  | -1.01816 | -2.29785 | -0.18775 | C                 | 0.29883  | 1.47721  | -0.91304 |
| N  | -2.33048 | -1.91297 | -0.15620 | C                 | 0.38420  | 2.60700  | -1.95572 |
| H  | -1.44938 | -5.66432 | -0.40124 | H                 | -0.61979 | 2.78722  | -2.36455 |
| H  | -4.32738 | -2.43532 | -0.17726 | O                 | 0.76382  | 3.87842  | -1.39954 |
| H  | -3.85371 | -4.90300 | -0.34471 | C                 | 1.91172  | 3.94733  | -0.63951 |
| H  | 0.36640  | -3.94929 | -0.29750 | C                 | 1.80489  | 4.36752  | 0.68629  |
| O  | -2.55790 | 0.22515  | -1.98210 | C                 | 3.18521  | 3.66542  | -1.18926 |
| H  | -3.51821 | 0.21544  | -2.15943 | C                 | 2.94193  | 4.47307  | 1.49646  |
| O  | -4.59809 | 0.04864  | 0.03551  | H                 | 0.80674  | 4.57590  | 1.07522  |
| H  | -4.93583 | 0.95458  | 0.12674  | C                 | 4.31876  | 3.74786  | -0.36932 |
| C  | 3.60947  | -0.20518 | 0.02200  | C                 | 4.19345  | 4.14838  | 0.96844  |
| C  | 4.41399  | 0.85353  | -0.43981 | H                 | 2.84324  | 4.79178  | 2.53620  |
| C  | 4.25833  | -1.34128 | 0.55578  | H                 | 5.30327  | 3.50943  | -0.77220 |
| C  | 5.80666  | 0.79610  | -0.37956 | H                 | 5.08851  | 4.20818  | 1.59159  |
| H  | 3.95063  | 1.73823  | -0.88061 | O                 | 3.21203  | 3.32075  | -2.50525 |
| C  | 5.64305  | -1.40893 | 0.63060  | C                 | 4.46990  | 2.99085  | -3.08795 |
| H  | 3.67184  | -2.17407 | 0.94813  | H                 | 5.15260  | 3.85584  | -3.06699 |
| C  | 6.43126  | -0.33990 | 0.16344  | H                 | 4.93687  | 2.13842  | -2.56922 |
| H  | 6.39376  | 1.63184  | -0.75946 | H                 | 4.25633  | 2.71577  | -4.12790 |
| H  | 6.14010  | -2.28083 | 1.05957  | H                 | 1.05674  | 2.32637  | -2.78061 |
| O  | 7.77498  | -0.49123 | 0.27727  | H                 | 4.47455  | -0.42468 | -1.88035 |
| C  | 8.61970  | 0.57252  | -0.16159 | O                 | 5.47226  | -0.35898 | 0.66653  |
|    |          |          |          | C                 | 6.44480  | -0.70631 | -0.31466 |

|   |          |          |          |                   |          |          |          |
|---|----------|----------|----------|-------------------|----------|----------|----------|
| H | 7.36580  | -0.93201 | 0.23677  | C                 | 4.66939  | -3.70496 | 0.39534  |
| H | 6.13987  | -1.59302 | -0.89170 | H                 | 4.55567  | -3.40489 | 2.54790  |
| H | 6.62392  | 0.13611  | -1.00356 | H                 | 4.45644  | -3.92606 | -1.73982 |
| H | -0.22405 | 0.65370  | -1.43950 | O                 | 5.97025  | -4.08874 | 0.30814  |
| O | -0.44879 | 1.89498  | 0.20752  | C                 | 6.76463  | -4.04761 | 1.49321  |
| C | -1.44585 | -1.70911 | -0.83610 | H                 | 6.39814  | -4.76971 | 2.24043  |
| C | -0.20403 | -2.34068 | -0.80876 | H                 | 7.78025  | -4.32281 | 1.18441  |
| C | 0.61364  | -2.25396 | 0.33898  | H                 | 6.76993  | -3.03552 | 1.92806  |
| C | 0.11417  | -1.53532 | 1.44749  | Ir                | -3.62162 | -0.17362 | 0.18322  |
| C | -1.12793 | -0.91711 | 1.38215  |                   |          |          |          |
| N | -1.87316 | -1.01381 | 0.25139  |                   |          |          |          |
| H | 0.12479  | -2.89532 | -1.68589 | <b>I-[Ir]-TS1</b> |          |          |          |
| H | 0.71254  | -1.41510 | 2.34762  | O                 | 2.78167  | -1.17186 | -2.43346 |
| C | -2.40725 | -1.66221 | -1.94913 | H                 | 2.56794  | -0.24160 | -2.26173 |
| C | -2.19660 | -2.23581 | -3.20595 | H                 | 1.99941  | -1.67393 | -1.93144 |
| C | -3.16900 | -2.10041 | -4.19679 | C                 | -3.23820 | -0.84729 | 0.94029  |
| C | -4.34017 | -1.38992 | -3.91391 | C                 | -2.23321 | -0.64938 | -0.01390 |
| C | -4.50570 | -0.84086 | -2.64628 | C                 | -1.21841 | -1.59269 | -0.22409 |
| N | -3.57118 | -0.97449 | -1.68730 | C                 | -1.22411 | -2.75040 | 0.56826  |
| H | -3.01143 | -2.54339 | -5.18140 | C                 | -2.22022 | -2.97522 | 1.51540  |
| H | -1.27230 | -2.77907 | -3.40240 | C                 | -3.23503 | -2.02330 | 1.70761  |
| H | -5.12235 | -1.25962 | -4.66241 | H                 | -2.24746 | 0.27046  | -0.60516 |
| H | -5.39575 | -0.28020 | -2.35667 | H                 | -0.42657 | -3.48003 | 0.42446  |
| C | -3.63592 | 1.25139  | 2.91173  | H                 | -2.22478 | -3.87922 | 2.12807  |
| C | -3.08531 | 1.63277  | 4.13139  | C                 | -0.13134 | -1.36496 | -1.27547 |
| C | -1.83177 | 1.13021  | 4.49421  | C                 | -0.72123 | -1.29008 | -2.70176 |
| C | -1.16572 | 0.27082  | 3.62123  | H                 | 0.06110  | -0.91907 | -3.37865 |
| C | -1.76123 | -0.07283 | 2.40447  | O                 | -1.07009 | -2.57337 | -3.26222 |
| N | -3.00018 | 0.41677  | 2.07001  | C                 | -1.91246 | -3.39583 | -2.55143 |
| H | -1.37366 | 1.40908  | 5.44440  | C                 | -1.44469 | -4.65587 | -2.17686 |
| H | -4.61014 | 1.61409  | 2.58184  | C                 | -3.24560 | -3.02371 | -2.25256 |
| H | -3.63708 | 2.31274  | 4.78116  | C                 | -2.26796 | -5.54786 | -1.47896 |
| H | -0.18262 | -0.12763 | 3.87160  | H                 | -0.40754 | -4.90020 | -2.41288 |
| O | -5.53493 | 0.52877  | 0.00824  | C                 | -4.06050 | -3.90904 | -1.53416 |
| H | -5.81262 | 0.89725  | 0.86168  | C                 | -3.57024 | -5.16527 | -1.14951 |
| O | -4.41870 | -1.88687 | 0.94719  | H                 | -1.88468 | -6.52629 | -1.18175 |
| H | -5.37164 | -1.69220 | 0.88939  | H                 | -5.08242 | -3.62723 | -1.27963 |
| C | 1.97576  | -2.82429 | 0.36577  | H                 | -4.22099 | -5.84236 | -0.59162 |
| C | 2.70403  | -2.92416 | 1.56735  | O                 | -3.64540 | -1.79837 | -2.69242 |
| C | 2.63186  | -3.21608 | -0.82214 | C                 | -4.95349 | -1.35484 | -2.34476 |
| C | 4.02978  | -3.35538 | 1.59502  | H                 | -5.72346 | -2.00404 | -2.79278 |
| H | 2.23677  | -2.66283 | 2.51746  | H                 | -5.08511 | -1.32559 | -1.25116 |
| C | 3.95108  | -3.65012 | -0.81263 | H                 | -5.04567 | -0.34082 | -2.75255 |
| H | 2.12089  | -3.14315 | -1.78294 | H                 | -1.58360 | -0.60611 | -2.74350 |
|   |          |          |          | H                 | -4.00669 | -0.08621 | 1.07878  |

|   |          |          |          |                   |          |          |          |
|---|----------|----------|----------|-------------------|----------|----------|----------|
| O | -4.16823 | -2.31575 | 2.66832  | C                 | -2.48406 | 6.06976  | -0.34564 |
| C | -5.22004 | -1.38122 | 2.87946  | H                 | -0.39763 | 5.59372  | -0.37643 |
| H | -5.85323 | -1.80804 | 3.66741  | C                 | -3.79312 | 5.61230  | -0.10316 |
| H | -4.82904 | -0.40547 | 3.21349  | H                 | -5.00182 | 3.89812  | 0.47930  |
| H | -5.81937 | -1.23962 | 1.96443  | H                 | -2.33717 | 7.10897  | -0.64572 |
| H | 0.21283  | -0.31178 | -1.11607 | O                 | -4.78944 | 6.51943  | -0.28037 |
| O | 0.90501  | -2.27852 | -1.18889 | C                 | -6.13410 | 6.10322  | -0.04680 |
| C | 1.76241  | 2.18226  | -0.33046 | H                 | -6.27359 | 5.78218  | 0.99806  |
| C | 0.73004  | 3.11312  | -0.42196 | H                 | -6.75922 | 6.98156  | -0.24798 |
| C | -0.44471 | 2.94188  | 0.34198  | H                 | -6.41900 | 5.28446  | -0.72698 |
| C | -0.50892 | 1.84512  | 1.22704  | Ir                | 3.01247  | -0.26750 | 0.51023  |
| C | 0.53480  | 0.92618  | 1.27480  |                   |          |          |          |
| N | 1.61666  | 1.09475  | 0.47021  |                   |          |          |          |
| H | 0.82323  | 3.95341  | -1.10879 | <b>I-[Ir]-IM2</b> |          |          |          |
| H | -1.37475 | 1.70635  | 1.87219  | C                 | 1.87618  | 1.64671  | -1.81243 |
| C | 3.05478  | 2.19999  | -1.03444 | C                 | 0.47888  | 1.77110  | -1.79708 |
| C | 3.47108  | 3.21717  | -1.89849 | C                 | -0.26395 | 1.55456  | -0.63170 |
| C | 4.72292  | 3.13307  | -2.50690 | C                 | 0.43137  | 1.20529  | 0.53823  |
| C | 5.54008  | 2.03066  | -2.24036 | C                 | 1.81633  | 1.09438  | 0.55133  |
| C | 5.07672  | 1.04443  | -1.37535 | C                 | 2.54940  | 1.30793  | -0.62910 |
| N | 3.87096  | 1.12280  | -0.78635 | H                 | -0.03852 | 2.02996  | -2.72529 |
| H | 5.05643  | 3.92216  | -3.18253 | H                 | -0.13293 | 1.00976  | 1.45027  |
| H | 2.81665  | 4.06727  | -2.08886 | H                 | 2.35171  | 0.82019  | 1.46200  |
| H | 6.52530  | 1.92684  | -2.69569 | C                 | -1.78135 | 1.71051  | -0.61935 |
| H | 5.66979  | 0.16075  | -1.13825 | C                 | -2.23026 | 3.16834  | -0.44293 |
| C | 1.85835  | -2.23366 | 2.55785  | H                 | -3.32780 | 3.19162  | -0.49436 |
| C | 0.94632  | -2.63000 | 3.53197  | O                 | -1.94010 | 3.75733  | 0.83835  |
| C | -0.15432 | -1.81206 | 3.80341  | C                 | -0.64792 | 3.96372  | 1.25767  |
| C | -0.32067 | -0.63001 | 3.08338  | C                 | -0.35891 | 3.62481  | 2.58292  |
| C | 0.61258  | -0.28634 | 2.10347  | C                 | 0.36391  | 4.55091  | 0.45644  |
| N | 1.70223  | -1.09179 | 1.86577  | C                 | 0.92138  | 3.80667  | 3.11576  |
| H | -0.88340 | -2.09452 | 4.56397  | H                 | -1.16135 | 3.17844  | 3.17388  |
| H | 2.74453  | -2.81898 | 2.30770  | C                 | 1.65249  | 4.70560  | 0.98649  |
| H | 1.10714  | -3.56547 | 4.06837  | C                 | 1.93157  | 4.33397  | 2.30829  |
| H | -1.17358 | 0.02141  | 3.26936  | H                 | 1.12654  | 3.52072  | 4.14949  |
| O | 4.32908  | -1.81091 | 0.58409  | H                 | 2.44311  | 5.13115  | 0.36822  |
| H | 5.12189  | -1.58711 | 0.07087  | H                 | 2.94253  | 4.46806  | 2.69910  |
| O | 3.85091  | 0.73635  | 1.98534  | O                 | 0.01832  | 4.92884  | -0.80640 |
| H | 3.50571  | 0.34168  | 2.80646  | C                 | 1.04448  | 5.39544  | -1.67714 |
| C | -1.58631 | 3.86796  | 0.20525  | H                 | 1.48464  | 6.33458  | -1.30435 |
| C | -2.90204 | 3.43003  | 0.44825  | H                 | 1.83532  | 4.63775  | -1.79877 |
| C | -1.40366 | 5.20939  | -0.19726 | H                 | 0.55771  | 5.57701  | -2.64311 |
| C | -3.99818 | 4.28115  | 0.29631  | H                 | -1.81720 | 3.78344  | -1.25283 |
| H | -3.08780 | 2.39323  | 0.73628  | H                 | 2.42194  | 1.80372  | -2.74308 |
|   |          |          |          | O                 | 3.90303  | 1.14284  | -0.53144 |

|   |          |          |          |                   |          |          |          |
|---|----------|----------|----------|-------------------|----------|----------|----------|
| C | 4.67403  | 1.18156  | -1.72661 | H                 | 3.61043  | -2.84663 | -2.01567 |
| H | 5.70545  | 0.95434  | -1.42973 | C                 | 6.21865  | -2.08780 | 0.03700  |
| H | 4.32485  | 0.42515  | -2.44848 | H                 | 6.02170  | -1.41384 | 2.09744  |
| H | 4.63801  | 2.17948  | -2.19452 | H                 | 6.08356  | -2.78102 | -2.00132 |
| H | -2.13502 | 1.48512  | -1.64641 | O                 | 7.57441  | -2.06039 | -0.06378 |
| O | -2.40202 | 0.89971  | 0.33853  | C                 | 8.32925  | -1.63539 | 1.06974  |
| C | -0.11711 | -1.56895 | -1.22215 | H                 | 8.16453  | -2.30442 | 1.92971  |
| C | 1.25163  | -1.80899 | -1.21485 | H                 | 9.38163  | -1.68235 | 0.76473  |
| C | 1.91587  | -2.07029 | 0.00366  | H                 | 8.07218  | -0.60137 | 1.35101  |
| C | 1.14502  | -2.13632 | 1.18284  | Ir                | -2.68716 | -1.09632 | -0.07954 |
| C | -0.22363 | -1.87557 | 1.13589  |                   |          |          |          |
| N | -0.80957 | -1.58449 | -0.05337 | <b>I-[Ir]-TS2</b> |          |          |          |
| H | 1.81286  | -1.73294 | -2.14459 | O                 | 3.52411  | 2.36344  | 0.01456  |
| H | 1.61620  | -2.36050 | 2.13875  | H                 | 4.21469  | 1.75266  | -0.28855 |
| C | -0.95578 | -1.20939 | -2.37672 | C                 | 4.08191  | -3.38375 | 0.41486  |
| C | -0.49417 | -1.12028 | -3.69210 | C                 | 2.81075  | -2.86583 | 0.69885  |
| C | -1.37608 | -0.74662 | -4.70615 | C                 | 2.63710  | -1.57853 | 1.21254  |
| C | -2.70912 | -0.46939 | -4.38630 | C                 | 3.78601  | -0.80541 | 1.45827  |
| C | -3.11769 | -0.56912 | -3.05990 | C                 | 5.05930  | -1.29408 | 1.17277  |
| N | -2.26714 | -0.92533 | -2.07993 | C                 | 5.21345  | -2.58773 | 0.64072  |
| H | -1.02499 | -0.67269 | -5.73652 | H                 | 1.91816  | -3.45910 | 0.48865  |
| H | 0.55005  | -1.33899 | -3.91313 | H                 | 3.68224  | 0.21260  | 1.84433  |
| H | -3.42891 | -0.17524 | -5.15067 | H                 | 5.95040  | -0.68402 | 1.33766  |
| H | -4.13806 | -0.35357 | -2.73858 | C                 | 1.21203  | -1.05068 | 1.45687  |
| C | -3.39181 | -1.31287 | 2.87766  | C                 | 0.97364  | -1.02298 | 2.99047  |
| C | -3.11053 | -1.54101 | 4.22146  | H                 | 1.86640  | -0.65505 | 3.51544  |
| C | -1.81301 | -1.91508 | 4.58546  | O                 | -0.04790 | -0.09813 | 3.41334  |
| C | -0.83539 | -2.04549 | 3.59845  | C                 | -1.33580 | -0.10289 | 2.94577  |
| C | -1.16847 | -1.80254 | 2.26291  | C                 | -1.92843 | 1.15411  | 2.77500  |
| N | -2.45254 | -1.44331 | 1.92527  | C                 | -2.12230 | -1.26558 | 2.74130  |
| H | -1.56146 | -2.10102 | 5.63082  | C                 | -3.26836 | 1.28163  | 2.39140  |
| H | -4.37896 | -1.01600 | 2.51898  | H                 | -1.30397 | 2.03352  | 2.94588  |
| H | -3.89953 | -1.42347 | 4.96496  | C                 | -3.44724 | -1.13071 | 2.30614  |
| H | 0.18399  | -2.33055 | 3.85869  | C                 | -4.02475 | 0.13550  | 2.14117  |
| O | -4.69256 | -0.56025 | -0.11348 | H                 | -3.70372 | 2.27528  | 2.26789  |
| H | -4.61291 | 0.37651  | 0.13932  | H                 | -4.04373 | -2.02412 | 2.11795  |
| O | -3.21851 | -3.05121 | -0.33217 | H                 | -5.06355 | 0.21209  | 1.81336  |
| H | -3.49462 | -3.13374 | -1.26018 | O                 | -1.54441 | -2.47058 | 3.01293  |
| C | 3.38882  | -2.15923 | 0.03579  | C                 | -2.07448 | -3.62246 | 2.36260  |
| C | 4.10930  | -1.77929 | 1.18312  | H                 | -3.05524 | -3.90628 | 2.77789  |
| C | 4.12859  | -2.52453 | -1.11059 | H                 | -2.16604 | -3.44912 | 1.27846  |
| C | 5.50447  | -1.73751 | 1.19454  | H                 | -1.35696 | -4.43194 | 2.54676  |
| H | 3.57630  | -1.46495 | 2.08225  | H                 | 0.74444  | -2.04292 | 3.33315  |
| C | 5.51724  | -2.49578 | -1.11285 | H                 | 4.17586  | -4.38811 | 0.00077  |

|   |          |          |          |                   |           |          |          |
|---|----------|----------|----------|-------------------|-----------|----------|----------|
| O | 6.49787  | -2.97718 | 0.36333  | C                 | -0.77253  | 3.01204  | 0.03106  |
| C | 6.69078  | -4.25218 | -0.23827 | N                 | 0.58225   | 3.20212  | 0.17858  |
| H | 7.77171  | -4.35273 | -0.39809 | H                 | -1.88400  | 5.89882  | 1.45146  |
| H | 6.34170  | -5.06492 | 0.42030  | H                 | 2.13306   | 4.39978  | 0.83688  |
| H | 6.16913  | -4.31862 | -1.20790 | H                 | 0.60952   | 6.20622  | 1.70013  |
| O | 0.26421  | -1.69695 | 0.76257  | H                 | -2.74250  | 3.82225  | 0.36034  |
| H | 1.26596  | 0.07315  | 1.21236  | O                 | 1.75128   | 2.59054  | -2.37496 |
| C | -3.99252 | -0.65519 | -1.31355 | H                 | 1.49875   | 3.51364  | -2.19423 |
| C | -5.14563 | 0.14483  | -1.40170 | Ir                | 1.69789   | 1.67210  | -0.62314 |
| C | -4.16897 | -2.05088 | -1.19075 |                   |           |          |          |
| C | -6.42755 | -0.40836 | -1.37115 |                   |           |          |          |
| H | -5.05046 | 1.22717  | -1.51034 | <b>I-[Ir]-IM3</b> |           |          |          |
| C | -5.43768 | -2.61618 | -1.15328 | O                 | 2.87191   | 0.98832  | -1.17460 |
| H | -3.30042 | -2.70371 | -1.08515 | H                 | 3.43960   | 0.31397  | -0.76956 |
| C | -6.58008 | -1.79907 | -1.24234 | C                 | -5.06285  | -1.02693 | -0.29036 |
| H | -7.29479 | 0.24680  | -1.45028 | C                 | -6.10471  | -0.29082 | -0.88324 |
| H | -5.56884 | -3.69400 | -1.04060 | C                 | -5.41464  | -2.05478 | 0.61276  |
| O | -7.78057 | -2.43617 | -1.19399 | C                 | -7.44592  | -0.56190 | -0.60319 |
| C | -8.96854 | -1.64939 | -1.26189 | H                 | -5.87221  | 0.50041  | -1.59914 |
| H | -9.02496 | -1.09725 | -2.21386 | C                 | -6.74438  | -2.33191 | 0.90577  |
| H | -9.80267 | -2.35874 | -1.19935 | H                 | -4.63359  | -2.62874 | 1.11559  |
| H | -9.02307 | -0.94089 | -0.41950 | C                 | -7.77333  | -1.58852 | 0.29830  |
| C | -0.23658 | -0.23717 | -1.53858 | H                 | -8.22317  | 0.02331  | -1.09425 |
| C | -1.51090 | -0.77842 | -1.70110 | H                 | -7.01107  | -3.11829 | 1.61437  |
| C | -2.64223 | -0.05871 | -1.27232 | O                 | -9.04448  | -1.92920 | 0.64220  |
| C | -2.45076 | 1.23358  | -0.73697 | C                 | -10.12286 | -1.19757 | 0.06233  |
| C | -1.16380 | 1.73983  | -0.59286 | H                 | -10.13109 | -1.30581 | -1.03435 |
| N | -0.09884 | 0.99394  | -0.99081 | H                 | -11.03929 | -1.63125 | 0.48058  |
| H | -1.62071 | -1.76858 | -2.14112 | H                 | -10.06565 | -0.12957 | 0.32798  |
| H | -3.30072 | 1.81561  | -0.38829 | C                 | -1.32332  | -1.42600 | -0.71039 |
| C | 1.05128  | -0.84938 | -1.90797 | C                 | -2.66418  | -1.73803 | -0.50545 |
| C | 1.17972  | -2.07849 | -2.56333 | C                 | -3.64531  | -0.72624 | -0.57638 |
| C | 2.44727  | -2.55553 | -2.88773 | C                 | -3.22685  | 0.58918  | -0.86802 |
| C | 3.57269  | -1.79225 | -2.55784 | C                 | -1.87595  | 0.86670  | -1.06182 |
| C | 3.38890  | -0.57567 | -1.91166 | N                 | -0.96115  | -0.14117 | -0.98096 |
| N | 2.16532  | -0.11270 | -1.59777 | H                 | -2.95060  | -2.76751 | -0.29281 |
| H | 2.55725  | -3.51588 | -3.39392 | H                 | -3.94992  | 1.40375  | -0.89283 |
| H | 0.28760  | -2.65362 | -2.80963 | C                 | -0.17007  | -2.33449 | -0.65821 |
| H | 4.58247  | -2.13156 | -2.78930 | C                 | -0.25267  | -3.70950 | -0.42096 |
| H | 4.22952  | 0.06089  | -1.63577 | C                 | 0.91361   | -4.47343 | -0.38413 |
| C | 1.04754  | 4.32521  | 0.75734  | C                 | 2.14570   | -3.84639 | -0.59372 |
| C | 0.19231  | 5.31416  | 1.23220  | C                 | 2.17190   | -2.47492 | -0.82735 |
| C | -1.18826 | 5.13889  | 1.09249  | N                 | 1.05083   | -1.73222 | -0.85287 |
| C | -1.67189 | 3.98027  | 0.48581  | H                 | 0.85956   | -5.54666 | -0.19498 |
|   |          |          |          | H                 | -1.22731  | -4.17155 | -0.26523 |

|   |          |          |          |                   |          |          |          |
|---|----------|----------|----------|-------------------|----------|----------|----------|
| H | 3.08193  | -4.40514 | -0.57402 | C                 | 8.84183  | -2.06387 | -0.65390 |
| H | 3.10405  | -1.93606 | -0.99833 | H                 | 9.80691  | -1.82516 | -1.11616 |
| C | 0.79023  | 3.33846  | -1.44157 | H                 | 9.00424  | -2.66978 | 0.25135  |
| C | 0.13198  | 4.55382  | -1.60138 | H                 | 8.21593  | -2.62037 | -1.36903 |
| C | -1.26644 | 4.57236  | -1.60763 | O                 | 2.50259  | -1.51410 | 2.33014  |
| C | -1.96325 | 3.37657  | -1.43912 | O                 | 1.02696  | 0.02840  | -3.24021 |
| C | -1.25609 | 2.18117  | -1.28161 | H                 | 1.09056  | 0.92393  | -3.61049 |
| N | 0.12026  | 2.17994  | -1.30079 | Ir                | 0.91534  | 0.31201  | -1.11399 |
| H | -1.81023 | 5.50961  | -1.73470 |                   |          |          |          |
| H | 1.87773  | 3.25240  | -1.42303 |                   |          |          |          |
| H | 0.71430  | 5.46813  | -1.71949 | <b>I-[Ir]-TS3</b> |          |          |          |
| H | -3.05297 | 3.36290  | -1.42811 | O                 | 2.91303  | 2.83491  | -0.72793 |
| H | 0.91742  | 0.50613  | 0.46864  | H                 | 3.63725  | 2.29629  | -1.08376 |
| C | 6.29545  | -1.95485 | 0.57959  | C                 | -4.34451 | -1.04506 | -0.73123 |
| C | 5.04813  | -1.82549 | 1.18234  | C                 | -5.57003 | -0.35413 | -0.73572 |
| C | 4.50123  | -0.56320 | 1.47938  | C                 | -4.38205 | -2.44777 | -0.56689 |
| C | 5.25295  | 0.59002  | 1.15864  | C                 | -6.78883 | -1.02028 | -0.59022 |
| C | 6.49841  | 0.47669  | 0.55818  | H                 | -5.58462 | 0.72815  | -0.87943 |
| C | 7.02934  | -0.79507 | 0.26162  | C                 | -5.58643 | -3.12387 | -0.41559 |
| H | 4.46979  | -2.71752 | 1.42939  | H                 | -3.45094 | -3.01707 | -0.53095 |
| H | 4.86482  | 1.58710  | 1.37121  | C                 | -6.80245 | -2.41565 | -0.42737 |
| H | 7.08483  | 1.36110  | 0.30367  | H                 | -7.71627 | -0.44835 | -0.61198 |
| C | 3.15378  | -0.50041 | 2.08371  | H                 | -5.60906 | -4.20621 | -0.27556 |
| C | 2.57467  | 0.87734  | 2.36029  | O                 | -7.93179 | -3.15759 | -0.27372 |
| H | 2.57938  | 1.43504  | 1.40914  | C                 | -9.18890 | -2.48387 | -0.26355 |
| O | 1.25278  | 0.72048  | 2.84354  | H                 | -9.36710 | -1.96189 | -1.21758 |
| C | 0.34265  | 1.69407  | 2.53349  | H                 | -9.94700 | -3.26434 | -0.12565 |
| C | 0.67385  | 3.02029  | 2.25284  | H                 | -9.24569 | -1.76328 | 0.56837  |
| C | -1.01362 | 1.28112  | 2.50468  | C                 | -0.69507 | -0.33575 | -1.43555 |
| C | -0.33518 | 3.95034  | 1.95592  | C                 | -1.92712 | -0.98478 | -1.40317 |
| H | 1.71919  | 3.33172  | 2.26552  | C                 | -3.05615 | -0.33649 | -0.86258 |
| C | -2.01271 | 2.21815  | 2.22711  | C                 | -2.90553 | 0.98696  | -0.39797 |
| C | -1.67066 | 3.55135  | 1.94968  | C                 | -1.66168 | 1.60791  | -0.45468 |
| H | -0.06384 | 4.98371  | 1.73134  | N                 | -0.58888 | 0.93343  | -0.95889 |
| H | -3.05804 | 1.91011  | 2.19874  | H                 | -2.01253 | -1.99671 | -1.79685 |
| H | -2.46119 | 4.26835  | 1.71957  | H                 | -3.74773 | 1.51361  | 0.04811  |
| O | -1.23153 | -0.04572 | 2.73416  | C                 | 0.59212  | -0.87785 | -1.89006 |
| C | -2.58145 | -0.48562 | 2.86294  | C                 | 0.76571  | -2.16033 | -2.41847 |
| H | -3.06498 | -0.01147 | 3.73310  | C                 | 2.04136  | -2.58771 | -2.78582 |
| H | -3.16417 | -0.26839 | 1.95670  | C                 | 3.12298  | -1.71778 | -2.62482 |
| H | -2.53172 | -1.57096 | 3.01254  | C                 | 2.89461  | -0.45225 | -2.09292 |
| H | 3.20392  | 1.41810  | 3.08900  | N                 | 1.66766  | -0.03626 | -1.73183 |
| H | 6.68966  | -2.94647 | 0.35906  | H                 | 2.18807  | -3.58880 | -3.19432 |
| O | 8.24694  | -0.80645 | -0.32629 | H                 | -0.09517 | -2.81811 | -2.53372 |
|   |          |          |          | H                 | 4.13764  | -2.01169 | -2.89150 |



|   |          |          |          |                   |          |          |          |
|---|----------|----------|----------|-------------------|----------|----------|----------|
| H | 3.70451  | 0.26209  | -1.94653 | O                 | 5.69639  | -3.08952 | -0.98011 |
| C | 0.44918  | 4.47757  | 0.37133  | C                 | 5.60081  | -4.43915 | -1.43186 |
| C | -0.40633 | 5.38247  | 0.99030  | H                 | 6.23433  | -4.50285 | -2.32477 |
| C | -1.75974 | 5.05399  | 1.12594  | H                 | 5.97102  | -5.14091 | -0.66742 |
| C | -2.21305 | 3.82712  | 0.64410  | H                 | 4.56153  | -4.69332 | -1.69608 |
| C | -1.31185 | 2.94716  | 0.03794  | O                 | 1.71097  | -2.06416 | 3.89507  |
| N | 0.01491  | 3.29053  | -0.09469 | Ir                | 1.14268  | 1.80766  | -0.93396 |
| H | -2.45466 | 5.74462  | 1.60604  |                   |          |          |          |
| H | 1.51411  | 4.67183  | 0.23584  |                   |          |          |          |
| H | -0.01080 | 6.32981  | 1.35795  | <b>I-[Ir]-IM4</b> |          |          |          |
| H | -3.25986 | 3.54158  | 0.74438  | C                 | -0.18935 | -1.09631 | -0.82771 |
| O | 0.93894  | 2.46244  | -2.93587 | C                 | -1.57781 | -1.06307 | -0.90305 |
| H | 0.68172  | 3.39596  | -2.84276 | C                 | -2.25486 | 0.17408  | -0.84423 |
| H | 1.38070  | 1.14150  | 0.71512  | C                 | -1.48761 | 1.35538  | -0.76482 |
| C | 4.16172  | -3.59509 | 0.85321  | C                 | -0.09876 | 1.28024  | -0.68113 |
| C | 3.40961  | -3.09308 | 1.91729  | N                 | 0.50718  | 0.06311  | -0.69370 |
| C | 3.40803  | -1.72818 | 2.24665  | H                 | -2.13564 | -1.99305 | -1.00248 |
| C | 4.21446  | -0.86328 | 1.47538  | H                 | -1.97805 | 2.32634  | -0.71127 |
| C | 4.97797  | -1.34605 | 0.42017  | C                 | 0.67903  | -2.28201 | -0.81483 |
| C | 4.94790  | -2.71443 | 0.09190  | C                 | 0.22092  | -3.59369 | -0.96338 |
| H | 2.78782  | -3.77048 | 2.50539  | C                 | 1.12833  | -4.64948 | -0.89120 |
| H | 4.23133  | 0.20819  | 1.67884  | C                 | 2.48243  | -4.37256 | -0.67767 |
| H | 5.59040  | -0.67465 | -0.18435 | C                 | 2.88523  | -3.04697 | -0.54482 |
| C | 2.49821  | -1.25015 | 3.33342  | N                 | 2.01252  | -2.02650 | -0.60999 |
| C | 2.47746  | 0.13878  | 3.65722  | H                 | 0.78152  | -5.67837 | -0.99887 |
| H | 3.29580  | 0.80699  | 3.39756  | H                 | -0.84094 | -3.77949 | -1.12222 |
| O | 1.43568  | 0.78136  | 1.87825  | H                 | 3.22431  | -5.16901 | -0.61254 |
| C | 0.11791  | 0.49691  | 2.18107  | H                 | 3.92846  | -2.77489 | -0.37928 |
| C | -0.68745 | 1.42641  | 2.84263  | C                 | 3.09688  | 2.94388  | -0.04015 |
| C | -0.41621 | -0.75641 | 1.79530  | C                 | 2.79885  | 4.30349  | -0.04044 |
| C | -2.01431 | 1.11416  | 3.15808  | C                 | 1.48031  | 4.70714  | -0.27297 |
| H | -0.25278 | 2.39376  | 3.10269  | C                 | 0.49858  | 3.74116  | -0.49567 |
| C | -1.73950 | -1.07529 | 2.12872  | C                 | 0.84821  | 2.38874  | -0.48285 |
| C | -2.53001 | -0.13756 | 2.80442  | N                 | 2.15168  | 2.01182  | -0.25395 |
| H | -2.64026 | 1.84493  | 3.67389  | H                 | 1.21690  | 5.76592  | -0.28204 |
| H | -2.16465 | -2.03736 | 1.84262  | H                 | 4.10189  | 2.55846  | 0.13891  |
| H | -3.56431 | -0.39259 | 3.04585  | H                 | 3.59380  | 5.02824  | 0.13753  |
| O | 0.41574  | -1.55888 | 1.09042  | H                 | -0.53610 | 4.03033  | -0.67843 |
| C | 0.03320  | -2.91374 | 0.88409  | O                 | 4.41202  | 0.09024  | 0.12692  |
| H | -0.12930 | -3.41595 | 1.85110  | H                 | 4.75948  | -0.81200 | 0.20523  |
| H | -0.87955 | -2.98362 | 0.27117  | O                 | 2.88141  | 0.12537  | -2.30808 |
| H | 0.86830  | -3.38633 | 0.35508  | H                 | 2.96017  | 1.07526  | -2.50089 |
| H | 1.79084  | 0.46220  | 4.44148  | O                 | 2.07019  | -0.24380 | 1.72978  |
| H | 4.12664  | -4.65962 | 0.62148  | C                 | 0.86165  | -0.69354 | 2.08927  |
|   |          |          |          | C                 | 0.56861  | -2.06360 | 2.21128  |



|              |          |          |          |   |          |          |          |
|--------------|----------|----------|----------|---|----------|----------|----------|
| H            | -3.84083 | 2.04322  | -1.81114 | N | 1.92583  | -3.01423 | -0.44995 |
| C            | -6.50993 | 0.13034  | -0.90639 | H | -0.10513 | -6.30894 | -0.47916 |
| H            | -6.37229 | -1.83295 | 0.02527  | H | -1.23315 | -4.12661 | -0.94989 |
| H            | -6.31525 | 2.07289  | -1.82424 | H | 2.36991  | -6.31875 | 0.01508  |
| O            | -7.86332 | 0.24182  | -0.96043 | H | 3.60805  | -4.12158 | -0.01148 |
| C            | -8.65240 | -0.83982 | -0.46707 | C | 4.23755  | 1.47717  | -0.96444 |
| H            | -8.46373 | -1.01116 | 0.60500  | C | 4.30545  | 2.83150  | -1.28809 |
| H            | -9.69729 | -0.54021 | -0.61246 | C | 3.12359  | 3.51665  | -1.57592 |
| H            | -8.45202 | -1.76535 | -1.03054 | C | 1.90989  | 2.82651  | -1.53726 |
| Ir           | 2.50659  | -0.01465 | -0.46928 | C | 1.90422  | 1.46371  | -1.22965 |
|              |          |          |          | N | 3.07334  | 0.81036  | -0.93979 |
| <b>1a-TS</b> |          |          |          | H | 3.14103  | 4.57906  | -1.82277 |
| O            | 3.42299  | -1.63858 | -2.56660 | H | 5.12274  | 0.88806  | -0.71876 |
| H            | 3.93401  | -0.85372 | -2.82631 | H | 5.27324  | 3.33365  | -1.30100 |
| H            | 2.51592  | -0.88674 | 0.93481  | H | 0.97330  | 3.33370  | -1.76630 |
| C            | -3.08580 | 0.48744  | -1.37302 | O | 0.88896  | 1.30748  | 1.63413  |
| C            | -3.44565 | 1.78233  | -1.81238 | C | 1.45198  | 2.47211  | 1.66942  |
| C            | -4.13185 | -0.38907 | -1.02761 | C | 2.81940  | 2.68355  | 1.99741  |
| C            | -4.77437 | 2.17695  | -1.89695 | C | 0.69450  | 3.65776  | 1.34198  |
| H            | -2.67779 | 2.49842  | -2.10720 | C | 3.39637  | 3.96036  | 2.00149  |
| C            | -5.47254 | -0.00938 | -1.10953 | H | 3.42025  | 1.79942  | 2.23146  |
| H            | -3.91230 | -1.39261 | -0.66165 | C | 1.27451  | 4.92511  | 1.33846  |
| C            | -5.80376 | 1.28454  | -1.54347 | C | 2.63573  | 5.08536  | 1.66987  |
| H            | -5.04001 | 3.17833  | -2.24050 | H | 4.45449  | 4.07108  | 2.25652  |
| H            | -6.24523 | -0.72222 | -0.82317 | H | 0.67789  | 5.80080  | 1.07485  |
| O            | -7.07329 | 1.75419  | -1.65072 | H | 3.08072  | 6.08312  | 1.66471  |
| C            | -8.14897 | 0.88755  | -1.29164 | O | -0.62085 | 3.40373  | 1.02290  |
| H            | -9.06668 | 1.46654  | -1.45026 | C | -1.40291 | 4.47458  | 0.52000  |
| H            | -8.16388 | -0.01010 | -1.93040 | H | -1.52509 | 5.27560  | 1.26955  |
| H            | -8.07899 | 0.58853  | -0.23340 | H | -0.95626 | 4.90286  | -0.39419 |
| C            | 0.02301  | -1.63759 | -0.94155 | H | -2.38719 | 4.05106  | 0.28105  |
| C            | -1.31624 | -1.28166 | -1.07814 | O | 4.73293  | -1.70611 | -0.11003 |
| C            | -1.66921 | 0.07422  | -1.26960 | H | 4.98607  | -1.95059 | -1.02078 |
| C            | -0.62858 | 1.02373  | -1.34572 | C | 1.07354  | -1.00583 | 3.05022  |
| C            | 0.69706  | 0.61956  | -1.20125 | H | 1.87475  | -1.74435 | 2.97544  |
| N            | 0.97909  | -0.68409 | -0.99535 | H | 1.30396  | -0.02856 | 3.46846  |
| H            | -2.07869 | -2.05673 | -1.03238 | C | -2.58273 | -0.72815 | 2.52072  |
| H            | -0.84709 | 2.08160  | -1.47158 | C | -1.28060 | -0.37891 | 2.78650  |
| Rh           | 2.81394  | -1.18153 | -0.59693 | C | -0.21919 | -1.34483 | 2.70370  |
| C            | 0.57953  | -2.98368 | -0.70756 | C | -0.54394 | -2.68164 | 2.28330  |
| C            | -0.16648 | -4.16491 | -0.73088 | C | -1.84136 | -3.03562 | 2.01884  |
| C            | 0.46712  | -5.38000 | -0.46848 | C | -2.87776 | -2.06858 | 2.15083  |
| C            | 1.83782  | -5.39032 | -0.19520 | H | -1.02572 | 0.64939  | 3.04002  |
| C            | 2.53510  | -4.18394 | -0.20246 | H | 0.25836  | -3.41753 | 2.20336  |

|              |          |          |          |   |          |          |          |
|--------------|----------|----------|----------|---|----------|----------|----------|
| H            | -2.11378 | -4.04708 | 1.71669  | H | -2.02424 | 5.30683  | -2.05006 |
| H            | -3.37528 | 0.01557  | 2.58700  | H | -3.14960 | 3.06641  | -1.80425 |
| O            | -4.10393 | -2.50824 | 1.90769  | C | -3.38930 | -2.56890 | -0.92967 |
| C            | -5.24383 | -1.66326 | 2.15950  | C | -3.35095 | -3.96343 | -0.92123 |
| H            | -6.11376 | -2.25699 | 1.86038  | C | -2.11446 | -4.60476 | -0.84596 |
| H            | -5.29353 | -1.42359 | 3.23113  | C | -0.94872 | -3.83536 | -0.80219 |
| H            | -5.18822 | -0.74535 | 1.56090  | C | -1.04456 | -2.44369 | -0.83634 |
| <b>1b-TS</b> |          |          |          | N | -2.27275 | -1.82796 | -0.88338 |
| O            | -2.48740 | -0.10156 | -3.15171 | H | -2.05147 | -5.69386 | -0.83112 |
| H            | -2.55015 | -1.06866 | -3.24490 | H | -4.32622 | -2.01317 | -0.97961 |
| H            | -1.61524 | 0.87214  | 0.63041  | H | -4.28406 | -4.52565 | -0.96387 |
| C            | 3.86130  | -1.11947 | -0.64080 | H | 0.03194  | -4.30967 | -0.76906 |
| C            | 4.38449  | -2.40304 | -0.91185 | O | -1.84363 | 0.68334  | 2.70356  |
| C            | 4.74861  | -0.13790 | -0.16123 | C | -2.50413 | -0.45277 | 2.42831  |
| C            | 5.73073  | -2.68681 | -0.71945 | C | -3.89080 | -0.45441 | 2.20328  |
| H            | 3.73287  | -3.18680 | -1.30323 | C | -1.81332 | -1.70002 | 2.40101  |
| C            | 6.10257  | -0.40972 | 0.04313  | C | -4.60356 | -1.65101 | 2.06508  |
| H            | 4.37613  | 0.85836  | 0.08665  | H | -4.40252 | 0.51059  | 2.19395  |
| C            | 6.60296  | -1.69205 | -0.23890 | C | -2.52828 | -2.89744 | 2.29320  |
| H            | 6.13369  | -3.67640 | -0.94278 | C | -3.92089 | -2.86864 | 2.12851  |
| H            | 6.75300  | 0.37484  | 0.42904  | H | -5.68497 | -1.62991 | 1.91385  |
| O            | 7.90153  | -2.05872 | -0.07756 | H | -2.00737 | -3.85480 | 2.31500  |
| C            | 8.82909  | -1.08247 | 0.39428  | H | -4.46467 | -3.81118 | 2.03607  |
| H            | 9.80071  | -1.58899 | 0.43963  | O | -0.45958 | -1.62594 | 2.52012  |
| H            | 8.89009  | -0.22758 | -0.29835 | C | 0.28435  | -2.83765 | 2.60260  |
| H            | 8.55183  | -0.72566 | 1.39928  | H | 0.01243  | -3.40372 | 3.50874  |
| C            | 0.63509  | 0.76463  | -1.24151 | H | 0.12543  | -3.46926 | 1.71532  |
| C            | 2.00015  | 0.49068  | -1.12739 | H | 1.33864  | -2.54017 | 2.65573  |
| C            | 2.42883  | -0.81891 | -0.84017 | O | -4.10898 | 0.72562  | -1.03229 |
| C            | 1.45470  | -1.83893 | -0.71887 | H | -4.32594 | 0.95293  | -1.95367 |
| C            | 0.10926  | -1.52952 | -0.89003 | C | -1.08281 | 1.54387  | 1.44095  |
| N            | -0.25457 | -0.25025 | -1.14444 | C | 0.33687  | 1.38747  | 1.54309  |
| H            | 2.72394  | 1.29613  | -1.24287 | C | 1.19925  | 2.47572  | 1.70024  |
| H            | 1.74835  | -2.85674 | -0.46590 | C | 0.69237  | 3.78049  | 1.71557  |
| Rh           | -2.14912 | 0.19429  | -1.18431 | C | -0.70266 | 3.97216  | 1.61072  |
| C            | -0.00659 | 2.07204  | -1.46613 | C | -1.56401 | 2.89850  | 1.47253  |
| C            | 0.68146  | 3.28354  | -1.57356 | H | 0.75103  | 0.37933  | 1.52573  |
| C            | -0.03721 | 4.46214  | -1.78197 | H | 2.27127  | 2.28596  | 1.77314  |
| C            | -1.42894 | 4.40786  | -1.88822 | H | -1.09045 | 4.99378  | 1.61092  |
| C            | -2.06460 | 3.17395  | -1.75936 | H | -2.63673 | 3.07372  | 1.36155  |
| N            | -1.37794 | 2.04297  | -1.55314 | O | 1.46020  | 4.92096  | 1.81725  |
| H            | 0.48959  | 5.41465  | -1.85769 | C | 2.87043  | 4.75813  | 1.80566  |
| H            | 1.76750  | 3.30133  | -1.48963 | H | 3.29777  | 5.76846  | 1.84339  |
|              |          |          |          | H | 3.21972  | 4.18306  | 2.68036  |

|                    |          |          |          |   |          |          |          |
|--------------------|----------|----------|----------|---|----------|----------|----------|
| H                  | 3.20743  | 4.25206  | 0.88386  | C | 0.82105  | -2.63348 | 3.40966  |
|                    |          |          |          | C | -1.21466 | -3.46078 | 2.36749  |
|                    |          |          |          | C | 1.34061  | -2.35624 | 2.14635  |
| <b>[2Rh]-1a-TS</b> |          |          |          | H | 1.40985  | -2.42188 | 4.30195  |
| O                  | 0.82169  | 0.22107  | -2.66034 | C | -0.66862 | -3.17385 | 1.11225  |
| O                  | 2.01830  | -1.68443 | -2.59155 | H | -2.21195 | -3.89411 | 2.44335  |
| C                  | 1.59996  | -0.63479 | -3.17840 | N | 0.57257  | -2.60916 | 1.04145  |
| C                  | 2.10335  | -0.37316 | -4.57424 | H | -0.88863 | -3.38423 | 4.50109  |
| H                  | 2.28360  | -1.31585 | -5.10742 | C | 2.66093  | -1.83827 | 1.80815  |
| H                  | 1.39429  | 0.25440  | -5.12943 | C | 3.68861  | -1.60443 | 2.73356  |
| H                  | 3.06069  | 0.16878  | -4.49897 | C | 4.93724  | -1.18993 | 2.28450  |
| O                  | 2.23246  | -4.06417 | -1.06210 | C | 5.14796  | -1.03698 | 0.90259  |
| H                  | 1.85579  | -4.65413 | -0.38725 | C | 4.09668  | -1.27394 | 0.02989  |
| C                  | -1.36977 | -0.02560 | 1.65572  | N | 2.87446  | -1.65057 | 0.45825  |
| C                  | -1.68015 | 0.02208  | 3.01456  | H | 5.74350  | -1.00018 | 2.99474  |
| C                  | -0.71674 | 0.48448  | 3.92442  | H | 3.49631  | -1.75370 | 3.79633  |
| C                  | 0.54468  | 0.89367  | 3.47353  | H | 6.11266  | -0.71805 | 0.50679  |
| C                  | 0.83255  | 0.84455  | 2.10647  | H | 4.20759  | -1.15892 | -1.04900 |
| N                  | -0.12941 | 0.39553  | 1.23856  | C | -0.88810 | -3.27282 | -2.52011 |
| H                  | -2.65992 | -0.30518 | 3.36265  | C | -2.05911 | -3.97194 | -2.79183 |
| H                  | 1.29665  | 1.24990  | 4.17780  | C | -2.84832 | -4.41970 | -1.72272 |
| Rh                 | 0.31989  | 0.23625  | -0.60772 | C | -2.43724 | -4.14909 | -0.42103 |
| C                  | -2.21146 | -0.45945 | 0.55382  | C | -1.24373 | -3.44751 | -0.20101 |
| C                  | -3.52151 | -0.95009 | 0.68178  | N | -0.48259 | -3.00927 | -1.26454 |
| C                  | -4.24763 | -1.28457 | -0.45236 | H | -3.77385 | -4.96817 | -1.90464 |
| C                  | -3.65930 | -1.08694 | -1.71832 | H | -0.23939 | -2.90636 | -3.31711 |
| C                  | -2.35923 | -0.61941 | -1.79277 | H | -2.34495 | -4.15738 | -3.82775 |
| N                  | -1.62155 | -0.32879 | -0.69474 | H | -3.02442 | -4.49023 | 0.43154  |
| H                  | -5.26071 | -1.67892 | -0.36450 | H | -0.47312 | 1.99653  | -1.05899 |
| H                  | -3.95512 | -1.06259 | 1.67569  | O | -0.58789 | 2.93254  | -1.54010 |
| H                  | -4.20045 | -1.31489 | -2.63716 | C | 0.57740  | 3.67999  | -1.39553 |
| H                  | -1.85255 | -0.48205 | -2.74933 | C | 1.33842  | 3.99235  | -2.51777 |
| C                  | 3.06974  | 1.54213  | -0.67801 | C | 0.95103  | 4.13466  | -0.11155 |
| C                  | 4.17971  | 2.14620  | -0.10566 | C | 2.49487  | 4.77017  | -2.37903 |
| C                  | 4.22780  | 2.31115  | 1.28910  | H | 1.01521  | 3.61599  | -3.48982 |
| C                  | 3.15500  | 1.86408  | 2.05251  | C | 2.10270  | 4.92054  | 0.02029  |
| C                  | 2.04549  | 1.27597  | 1.42621  | C | 2.86633  | 5.22989  | -1.11259 |
| N                  | 2.01709  | 1.10960  | 0.05103  | H | 3.09738  | 5.01325  | -3.25610 |
| H                  | 5.09063  | 2.77663  | 1.76780  | H | 2.41237  | 5.28086  | 1.00104  |
| H                  | 2.99529  | 1.38966  | -1.75525 | H | 3.76638  | 5.83695  | -0.99362 |
| H                  | 4.99472  | 2.48388  | -0.74652 | O | 0.13921  | 3.76703  | 0.90830  |
| H                  | 3.16041  | 1.97278  | 3.13738  | C | 0.40444  | 4.28276  | 2.21186  |
| H                  | -0.95073 | 0.52128  | 4.98920  | H | 1.39305  | 3.95888  | 2.57085  |
| Rh                 | 1.30472  | -2.23134 | -0.69129 | H | 0.34902  | 5.38292  | 2.21064  |
| C                  | -0.46837 | -3.17723 | 3.51620  |   |          |          |          |



|               |          |          |          |    |          |          |          |
|---------------|----------|----------|----------|----|----------|----------|----------|
| C             | 5.80093  | 4.49292  | 0.71073  | Rh | 0.38227  | -0.36512 | 2.12265  |
| H             | 6.41705  | 5.04390  | 1.43297  | C  | 0.88781  | -2.13407 | -0.09381 |
| H             | 6.41143  | 4.24815  | -0.17542 | C  | 0.70627  | -3.10309 | -1.08259 |
| H             | 4.95008  | 5.12423  | 0.40040  | C  | -0.49285 | -3.81831 | -1.12912 |
| Rh            | -2.84960 | 0.09688  | -0.61269 | C  | -1.47843 | -3.55841 | -0.17657 |
| C             | -2.61310 | 1.11257  | 3.92849  | C  | -1.24401 | -2.56881 | 0.77736  |
| C             | -2.76933 | -0.21862 | 3.52278  | N  | -0.10484 | -1.86784 | 0.81136  |
| C             | -2.57777 | 2.14250  | 2.98467  | H  | -0.64751 | -4.57677 | -1.89803 |
| C             | -2.86906 | -0.50135 | 2.15965  | H  | 1.50045  | -3.29809 | -1.80283 |
| H             | -2.80450 | -1.02284 | 4.25654  | H  | -2.42586 | -4.09821 | -0.16740 |
| C             | -2.68131 | 1.81909  | 1.62811  | H  | -1.98235 | -2.32922 | 1.54122  |
| H             | -2.46392 | 3.18066  | 3.29479  | C  | 1.02273  | 1.84386  | 4.10765  |
| N             | -2.80129 | 0.51750  | 1.26280  | C  | 1.83973  | 2.81503  | 4.68505  |
| H             | -2.52073 | 1.34686  | 4.98948  | C  | 3.13624  | 2.98399  | 4.19439  |
| C             | -3.04911 | -1.81053 | 1.52130  | C  | 3.57850  | 2.18208  | 3.14053  |
| C             | -3.23511 | -3.01108 | 2.21298  | C  | 2.71591  | 1.22587  | 2.60007  |
| C             | -3.45307 | -4.18518 | 1.49419  | N  | 1.44951  | 1.07220  | 3.09905  |
| C             | -3.49498 | -4.13204 | 0.09681  | H  | 3.80041  | 3.73489  | 4.62521  |
| C             | -3.29139 | -2.91094 | -0.53939 | H  | 0.00059  | 1.66539  | 4.44504  |
| N             | -3.05607 | -1.78258 | 0.15056  | H  | 1.45617  | 3.42350  | 5.50457  |
| H             | -3.59652 | -5.13068 | 2.01912  | H  | 4.58414  | 2.29697  | 2.73674  |
| H             | -3.21326 | -3.01742 | 3.30238  | O  | -1.31211 | -0.09613 | 3.19465  |
| H             | -3.67149 | -5.02576 | -0.50171 | H  | -1.99152 | -0.69857 | 2.85144  |
| H             | -3.30676 | -2.81392 | -1.62530 | O  | 0.91524  | -1.76139 | 3.48300  |
| C             | -2.84705 | 2.88447  | -1.85181 | H  | 0.14467  | -1.67233 | 4.07390  |
| C             | -2.82488 | 4.27731  | -1.80283 | C  | 5.63867  | -0.63611 | -1.12123 |
| C             | -2.71053 | 4.91020  | -0.56271 | C  | 6.49841  | 0.47522  | -1.20393 |
| C             | -2.64668 | 4.13224  | 0.59396  | C  | 6.01654  | -1.81191 | -1.80738 |
| C             | -2.69079 | 2.74031  | 0.48596  | C  | 7.68588  | 0.43133  | -1.93566 |
| N             | -2.76608 | 2.13327  | -0.74265 | H  | 6.23106  | 1.41052  | -0.70836 |
| H             | -2.67425 | 5.99829  | -0.49355 | C  | 7.19903  | -1.87353 | -2.53280 |
| H             | -2.92941 | 2.34633  | -2.79639 | H  | 5.38816  | -2.70278 | -1.75187 |
| H             | -2.88627 | 4.84683  | -2.73035 | C  | 8.04566  | -0.75106 | -2.60440 |
| H             | -2.56986 | 4.59613  | 1.57665  | H  | 8.31669  | 1.31853  | -1.98464 |
|               |          |          |          | H  | 7.49387  | -2.78880 | -3.04929 |
|               |          |          |          | O  | 9.17986  | -0.90018 | -3.33569 |
| <b>1c-IM1</b> |          |          |          | C  | 10.07609 | 0.20623  | -3.43309 |
| C             | 2.12532  | -1.35192 | 0.09119  | H  | 10.44896 | 0.50197  | -2.43937 |
| C             | 3.29189  | -1.41005 | -0.66930 | H  | 10.91295 | -0.13952 | -4.05175 |
| C             | 4.38567  | -0.57937 | -0.34172 | H  | 9.58978  | 1.06762  | -3.91834 |
| C             | 4.24790  | 0.30925  | 0.74687  | O  | -0.20320 | 1.06541  | 0.75980  |
| C             | 3.05739  | 0.33845  | 1.47088  | H  | -0.81353 | 1.61933  | 1.27751  |
| N             | 2.05361  | -0.50223 | 1.13804  | C  | -4.74299 | -2.84164 | -1.83794 |
| H             | 3.34567  | -2.08185 | -1.52485 | C  | -4.02947 | -1.66042 | -1.61357 |
| H             | 5.06992  | 0.96284  | 1.03546  |    |          |          |          |

|               |          |          |          |    |          |          |          |
|---------------|----------|----------|----------|----|----------|----------|----------|
| C             | -3.91421 | -1.10651 | -0.33169 | C  | 4.14321  | -0.39982 | -0.45728 |
| C             | -4.54350 | -1.76832 | 0.73845  | C  | 3.90240  | -0.18784 | 0.91829  |
| C             | -5.26363 | -2.94496 | 0.53331  | C  | 2.68678  | -0.57679 | 1.47614  |
| C             | -5.36507 | -3.49088 | -0.75818 | N  | 1.75219  | -1.15834 | 0.69297  |
| H             | -3.53313 | -1.17106 | -2.45412 | H  | 3.27931  | -1.19266 | -2.29216 |
| H             | -4.45361 | -1.36376 | 1.75032  | H  | 4.66802  | 0.26115  | 1.54925  |
| H             | -5.74414 | -3.46458 | 1.36448  | Rh | 0.02474  | -1.59154 | 1.50392  |
| C             | -3.12447 | 0.16736  | -0.11405 | C  | 0.79819  | -2.10203 | -1.24320 |
| C             | -3.96644 | 1.41278  | -0.44391 | C  | 0.79627  | -2.57429 | -2.55677 |
| H             | -4.19118 | 1.41572  | -1.52134 | C  | -0.29138 | -3.32216 | -3.01398 |
| O             | -3.16651 | 2.57510  | -0.11380 | C  | -1.35043 | -3.58362 | -2.14525 |
| C             | -2.65711 | 3.30854  | -1.16129 | C  | -1.30737 | -3.05734 | -0.85348 |
| C             | -1.27656 | 3.48148  | -1.26574 | N  | -0.27223 | -2.32852 | -0.41854 |
| C             | -3.51911 | 3.94597  | -2.08759 | H  | -0.30081 | -3.70533 | -4.03550 |
| C             | -0.73233 | 4.27290  | -2.28561 | H  | 1.64933  | -2.37578 | -3.20518 |
| H             | -0.64023 | 2.96672  | -0.54357 | H  | -2.21148 | -4.17694 | -2.45227 |
| C             | -2.96909 | 4.72229  | -3.11702 | H  | -2.11994 | -3.22399 | -0.14635 |
| C             | -1.57995 | 4.88442  | -3.21177 | C  | 0.49940  | -0.80565 | 4.39604  |
| H             | 0.35028  | 4.39761  | -2.35668 | C  | 1.25186  | -0.29585 | 5.45424  |
| H             | -3.62196 | 5.21371  | -3.83893 | C  | 2.54893  | 0.15327  | 5.20214  |
| H             | -1.16907 | 5.49682  | -4.01762 | C  | 3.05991  | 0.07799  | 3.90420  |
| O             | -4.85343 | 3.75832  | -1.89492 | C  | 2.26132  | -0.44129 | 2.88402  |
| C             | -5.76118 | 4.32154  | -2.83742 | N  | 0.99086  | -0.87163 | 3.15318  |
| H             | -5.69331 | 5.42149  | -2.84637 | H  | 3.16357  | 0.55824  | 6.00757  |
| H             | -5.57274 | 3.93120  | -3.85061 | H  | -0.52203 | -1.16654 | 4.52569  |
| H             | -6.76175 | 4.01758  | -2.50671 | H  | 0.81750  | -0.25572 | 6.45347  |
| H             | -4.80456 | -3.24889 | -2.84713 | H  | 4.07115  | 0.41977  | 3.68499  |
| O             | -6.07569 | -4.65024 | -0.86822 | O  | -1.68932 | -1.97037 | 2.47167  |
| C             | -6.18404 | -5.25402 | -2.15438 | H  | -2.34037 | -2.28250 | 1.82225  |
| H             | -6.78141 | -6.16288 | -2.01153 | O  | 0.62865  | -3.38316 | 1.99843  |
| H             | -6.69552 | -4.58637 | -2.86695 | H  | -0.14281 | -3.64448 | 2.54039  |
| H             | -5.19195 | -5.52499 | -2.55149 | C  | 5.41918  | 0.01516  | -1.07294 |
| O             | -1.94862 | 0.16646  | -0.90240 | C  | 6.16254  | 1.09065  | -0.55112 |
| H             | -2.85617 | 0.23214  | 0.95675  | C  | 5.93502  | -0.65346 | -2.20566 |
| C             | -5.28093 | 1.52358  | 0.33293  | C  | 7.36835  | 1.49523  | -1.12493 |
| H             | -5.61737 | 2.56656  | 0.26703  | H  | 5.78536  | 1.64990  | 0.30725  |
| H             | -5.11103 | 1.28778  | 1.40050  | C  | 7.13833  | -0.26822 | -2.78170 |
| O             | -6.31557 | 0.72282  | -0.22111 | H  | 5.40140  | -1.50681 | -2.62842 |
| H             | -6.05748 | -0.20834 | -0.10111 | C  | 7.86671  | 0.81164  | -2.24714 |
| H             | -1.20795 | 0.50945  | -0.28960 | H  | 7.90502  | 2.34252  | -0.69889 |
|               |          |          |          | H  | 7.54111  | -0.79682 | -3.64754 |
|               |          |          |          | O  | 9.02985  | 1.12033  | -2.87496 |
| <b>1c-TS1</b> |          |          |          | C  | 9.81225  | 2.20053  | -2.36644 |
| C             | 1.93968  | -1.40291 | -0.62026 | H  | 10.12863 | 2.00570  | -1.32920 |
| C             | 3.13668  | -1.02391 | -1.22571 |    |          |          |          |



|   |          |          |          |               |          |          |          |
|---|----------|----------|----------|---------------|----------|----------|----------|
| H | 10.69465 | 2.26224  | -3.01455 | H             | -5.69279 | 0.21692  | -0.45182 |
| H | 9.25356  | 3.14903  | -2.41200 | H             | -0.69496 | 1.14785  | 1.01434  |
| O | -0.02753 | 1.40939  | 1.78939  |               |          |          |          |
| H | -0.51321 | 1.15480  | 2.58971  | <b>1c-IM2</b> |          |          |          |
| C | -4.04489 | -1.70954 | -2.48516 | C             | 0.42687  | 1.13836  | -1.60078 |
| C | -3.43325 | -0.68476 | -1.75988 | C             | 1.66998  | 1.71176  | -1.33528 |
| C | -3.55167 | -0.59435 | -0.36499 | C             | 2.81212  | 0.88852  | -1.23119 |
| C | -4.31837 | -1.57080 | 0.29620  | C             | 2.65820  | -0.50392 | -1.41128 |
| C | -4.92503 | -2.61338 | -0.40903 | C             | 1.39356  | -1.02880 | -1.66891 |
| C | -4.78395 | -2.69183 | -1.80418 | N             | 0.33547  | -0.19802 | -1.77217 |
| H | -2.82907 | 0.05718  | -2.28713 | H             | 1.74582  | 2.78395  | -1.15904 |
| H | -4.43623 | -1.51964 | 1.38222  | H             | 3.51605  | -1.17034 | -1.33477 |
| H | -5.50245 | -3.38339 | 0.10665  | Rh            | -1.44379 | -0.98393 | -1.72653 |
| C | -2.85842 | 0.54690  | 0.37021  | C             | -0.88033 | 1.81790  | -1.70654 |
| C | -3.69476 | 1.83601  | 0.18132  | C             | -1.05213 | 3.20371  | -1.74999 |
| H | -3.67966 | 2.11652  | -0.88309 | C             | -2.33389 | 3.72767  | -1.92694 |
| O | -3.06702 | 2.88868  | 0.95943  | C             | -3.41735 | 2.85625  | -2.05996 |
| C | -2.46712 | 3.91720  | 0.27324  | C             | -3.18807 | 1.48312  | -1.99476 |
| C | -1.12302 | 4.20042  | 0.52202  | N             | -1.95921 | 0.98128  | -1.81420 |
| C | -3.20428 | 4.73811  | -0.61730 | H             | -2.48267 | 4.80790  | -1.96350 |
| C | -0.49197 | 5.28150  | -0.10729 | H             | -0.18774 | 3.86171  | -1.66241 |
| H | -0.58413 | 3.53326  | 1.19886  | H             | -4.43368 | 3.22640  | -2.19554 |
| C | -2.56358 | 5.80803  | -1.25738 | H             | -3.99461 | 0.75411  | -2.08099 |
| C | -1.21222 | 6.07816  | -0.99987 | C             | -0.78408 | -3.95796 | -1.74781 |
| H | 0.56135  | 5.48797  | 0.09506  | C             | 0.08020  | -5.05103 | -1.80922 |
| H | -3.12032 | 6.44395  | -1.94635 | C             | 1.45588  | -4.81981 | -1.87599 |
| H | -0.73143 | 6.91966  | -1.50389 | C             | 1.92990  | -3.50669 | -1.85622 |
| O | -4.51953 | 4.42530  | -0.77858 | C             | 1.01746  | -2.45352 | -1.76848 |
| C | -5.28362 | 5.16116  | -1.72851 | N             | -0.32838 | -2.69906 | -1.73909 |
| H | -5.35832 | 6.22331  | -1.44381 | H             | 2.15724  | -5.65327 | -1.93938 |
| H | -4.84694 | 5.07914  | -2.73711 | H             | -1.86815 | -4.07275 | -1.70018 |
| H | -6.28247 | 4.70802  | -1.72265 | H             | -0.32858 | -6.06185 | -1.81205 |
| H | -3.92189 | -1.75212 | -3.56742 | H             | 2.99822  | -3.29732 | -1.90204 |
| O | -5.38034 | -3.75903 | -2.41506 | O             | -3.27425 | -1.85031 | -1.60857 |
| C | -5.25719 | -3.87718 | -3.82968 | H             | -3.80477 | -1.25202 | -1.05671 |
| H | -5.79846 | -4.79100 | -4.10436 | O             | -1.67671 | -1.12593 | -3.73902 |
| H | -5.71089 | -3.01367 | -4.34316 | H             | -2.54441 | -1.56882 | -3.74977 |
| H | -4.20136 | -3.97161 | -4.13247 | C             | 4.13010  | 1.46543  | -0.89951 |
| O | -1.55478 | 0.72147  | -0.06997 | C             | 5.09767  | 0.70921  | -0.21215 |
| H | -2.91139 | 0.31415  | 1.45950  | C             | 4.45489  | 2.79660  | -1.24198 |
| C | -5.15093 | 1.72831  | 0.64477  | C             | 6.33920  | 1.24592  | 0.13135  |
| H | -5.52941 | 2.74496  | 0.81206  | H             | 4.87182  | -0.31425 | 0.09290  |
| H | -5.19981 | 1.18329  | 1.60717  | C             | 5.68978  | 3.34172  | -0.91460 |
| O | -5.99845 | 1.13348  | -0.33074 | H             | 3.73911  | 3.40932  | -1.79363 |

|   |          |          |          |               |          |          |          |
|---|----------|----------|----------|---------------|----------|----------|----------|
| C | 6.64297  | 2.57183  | -0.22120 | C             | -2.64916 | -1.29628 | 3.70550  |
| H | 7.05503  | 0.63181  | 0.67721  | H             | -2.11639 | -1.64955 | 4.59971  |
| H | 5.94263  | 4.36678  | -1.19163 | H             | -3.38647 | -2.07090 | 3.42104  |
| O | 7.81953  | 3.18743  | 0.06455  | O             | -3.28369 | -0.07784 | 4.06532  |
| C | 8.81843  | 2.45020  | 0.76858  | H             | -3.77895 | 0.23120  | 3.28624  |
| H | 9.13415  | 1.56393  | 0.19500  |               |          |          |          |
| H | 9.66800  | 3.13354  | 0.88635  |               |          |          |          |
| H | 8.45464  | 2.13901  | 1.76105  | <b>1c-TS2</b> |          |          |          |
| C | -3.37526 | 2.65479  | 1.20518  | O             | 3.55865  | 2.25175  | -0.90183 |
| C | -2.57183 | 1.51622  | 1.26262  | H             | 4.17014  | 1.50746  | -0.77443 |
| C | -3.10977 | 0.22674  | 1.11869  | C             | 3.76109  | -2.86904 | 0.64828  |
| C | -4.49565 | 0.10609  | 0.92325  | C             | 2.59684  | -2.16879 | 0.97789  |
| C | -5.31503 | 1.23517  | 0.84622  | C             | 2.61798  | -0.80387 | 1.29365  |
| C | -4.75581 | 2.51569  | 0.97597  | C             | 3.86072  | -0.14383 | 1.26686  |
| H | -1.49530 | 1.63169  | 1.40950  | C             | 5.03425  | -0.82004 | 0.92571  |
| H | -4.94198 | -0.88797 | 0.82559  | C             | 4.98865  | -2.18764 | 0.60858  |
| H | -6.38897 | 1.14347  | 0.67211  | H             | 1.63116  | -2.67888 | 0.96158  |
| C | -2.18607 | -0.98173 | 1.17315  | H             | 3.90624  | 0.92545  | 1.48857  |
| C | -1.61115 | -1.13443 | 2.59279  | H             | 5.99371  | -0.30010 | 0.88182  |
| H | -0.99064 | -0.25572 | 2.81502  | C             | 1.29593  | -0.08136 | 1.60123  |
| O | -0.79243 | -2.32898 | 2.63896  | C             | 1.00461  | -0.10111 | 3.12788  |
| C | 0.56699  | -2.18442 | 2.50991  | O             | -0.03323 | 0.86152  | 3.44521  |
| C | 1.23549  | -2.95364 | 1.55611  | C             | -1.27541 | 0.87136  | 2.87045  |
| C | 1.31179  | -1.34591 | 3.37814  | C             | -1.78988 | 2.12309  | 2.51407  |
| C | 2.62736  | -2.87591 | 1.41940  | C             | -2.10368 | -0.27264 | 2.74029  |
| H | 0.63861  | -3.60725 | 0.91731  | C             | -3.09828 | 2.26130  | 2.03157  |
| C | 2.69960  | -1.24176 | 3.21141  | H             | -1.13281 | 2.98949  | 2.61723  |
| C | 3.35331  | -2.00491 | 2.23418  | C             | -3.39141 | -0.13519 | 2.21026  |
| H | 3.13472  | -3.48600 | 0.67046  | C             | -3.89692 | 1.12865  | 1.87070  |
| H | 3.27858  | -0.58272 | 3.85881  | H             | -3.47628 | 3.25096  | 1.76794  |
| H | 4.43687  | -1.92031 | 2.12694  | H             | -4.01670 | -1.01948 | 2.07942  |
| O | 0.60699  | -0.69890 | 4.34893  | H             | -4.91144 | 1.21163  | 1.47509  |
| C | 1.30130  | 0.20778  | 5.20044  | O             | -1.59120 | -1.46775 | 3.15708  |
| H | 2.07140  | -0.31334 | 5.79217  | C             | -2.06452 | -2.64570 | 2.50834  |
| H | 1.76829  | 1.01895  | 4.61869  | H             | -3.10313 | -2.88071 | 2.79217  |
| H | 0.54281  | 0.62669  | 5.87283  | H             | -1.99148 | -2.53623 | 1.41482  |
| H | -2.92277 | 3.64023  | 1.31292  | H             | -1.40886 | -3.46014 | 2.84205  |
| O | -5.61638 | 3.56885  | 0.85002  | H             | 0.67533  | -1.11418 | 3.40435  |
| C | -5.08142 | 4.88670  | 0.94123  | H             | 3.70104  | -3.92860 | 0.39835  |
| H | -5.92939 | 5.56717  | 0.79544  | O             | 6.17617  | -2.76702 | 0.25210  |
| H | -4.63228 | 5.06763  | 1.93151  | C             | 6.17199  | -4.15328 | -0.07301 |
| H | -4.32770 | 5.06582  | 0.15737  | H             | 7.20944  | -4.40873 | -0.32236 |
| O | -1.10924 | -0.85321 | 0.29585  | H             | 5.84033  | -4.76321 | 0.78358  |
| H | -2.79006 | -1.88836 | 0.96129  | H             | 5.52509  | -4.35945 | -0.94159 |
|   |          |          |          | O             | 0.25163  | -0.58716 | 0.89498  |



|   |          |          |          |    |          |         |          |
|---|----------|----------|----------|----|----------|---------|----------|
| O | -0.90380 | -3.31616 | 0.49635  | H  | -0.11326 | 0.91400 | -2.58220 |
| C | -3.35172 | -2.09412 | 0.00425  | H  | 0.87220  | 1.58007 | -1.25070 |
| H | -3.35275 | -2.99639 | -0.63171 | O  | -1.11893 | 2.06162 | -1.17856 |
| H | -3.40008 | -2.41888 | 1.05328  | H  | -1.98060 | 1.60512 | -1.32715 |
| O | -4.49245 | -1.28323 | -0.23127 | O  | -0.59022 | 0.85604 | 1.68583  |
| H | -4.51196 | -1.07365 | -1.18027 | H  | -0.09637 | 0.32992 | 2.33385  |
|   |          |          |          | Na | -1.26421 | 2.77002 | 0.97433  |

**1c-A-TS3**

|   |          |          |          |
|---|----------|----------|----------|
| H | -0.41185 | 0.26380  | 0.60170  |
| C | 3.80872  | 0.59630  | 0.70386  |
| C | 2.48247  | 0.26436  | 0.41375  |
| C | 2.16795  | -0.78272 | -0.46895 |
| C | 3.22787  | -1.51104 | -1.04650 |
| C | 4.55145  | -1.18126 | -0.78302 |
| C | 4.85176  | -0.12131 | 0.09472  |
| H | 1.67748  | 0.80318  | 0.91823  |
| H | 2.99495  | -2.34050 | -1.71757 |
| H | 5.37511  | -1.73132 | -1.24260 |
| C | 0.76374  | -1.19495 | -0.78015 |
| C | -0.28465 | -0.18297 | -0.71852 |
| O | -1.56046 | -0.71482 | -1.17552 |
| C | -2.49962 | -0.97917 | -0.21118 |
| C | -2.37432 | -2.04900 | 0.67591  |
| C | -3.62923 | -0.13338 | -0.13725 |
| C | -3.37146 | -2.29790 | 1.62842  |
| H | -1.48717 | -2.67995 | 0.59952  |
| C | -4.62805 | -0.38395 | 0.81054  |
| C | -4.49354 | -1.46809 | 1.68994  |
| H | -3.26803 | -3.13946 | 2.31669  |
| H | -5.50322 | 0.26301  | 0.87521  |
| H | -5.27767 | -1.65501 | 2.42695  |
| O | -3.64720 | 0.91148  | -1.02289 |
| C | -4.71050 | 1.86188  | -0.92943 |
| H | -5.67938 | 1.38267  | -1.13847 |
| H | -4.73300 | 2.33049  | 0.06750  |
| H | -4.50033 | 2.62013  | -1.69290 |
| H | 4.01815  | 1.40223  | 1.40717  |
| O | 6.17267  | 0.13082  | 0.30017  |
| C | 6.52961  | 1.19240  | 1.18315  |
| H | 7.62602  | 1.22020  | 1.19232  |
| H | 6.13957  | 2.15758  | 0.82157  |
| H | 6.15773  | 1.00245  | 2.20300  |
| O | 0.52876  | -2.39889 | -1.02435 |
| C | -0.08904 | 1.10933  | -1.49315 |

**1c-A-IM4**

|   |          |          |          |
|---|----------|----------|----------|
| H | -0.40011 | 0.06467  | 1.07108  |
| C | 3.81047  | 0.72527  | 0.52928  |
| C | 2.47538  | 0.37460  | 0.29474  |
| C | 2.12947  | -0.77036 | -0.44144 |
| C | 3.18124  | -1.58002 | -0.91729 |
| C | 4.51384  | -1.24216 | -0.70554 |
| C | 4.83947  | -0.08137 | 0.01947  |
| H | 1.69424  | 1.00161  | 0.72666  |
| H | 2.93216  | -2.49161 | -1.46462 |
| H | 5.32344  | -1.86669 | -1.08948 |
| C | 0.71916  | -1.23886 | -0.70017 |
| C | -0.30197 | -0.29511 | -0.90234 |
| O | -1.58001 | -0.84366 | -1.28644 |
| C | -2.51306 | -0.95778 | -0.28200 |
| C | -2.40622 | -1.93464 | 0.70988  |
| C | -3.60955 | -0.06574 | -0.27149 |
| C | -3.38368 | -2.04327 | 1.70687  |
| H | -1.53978 | -2.59725 | 0.67617  |
| C | -4.58789 | -0.17469 | 0.72442  |
| C | -4.47075 | -1.16595 | 1.70916  |
| H | -3.29212 | -2.81241 | 2.47675  |
| H | -5.43639 | 0.50958  | 0.74251  |
| H | -5.24019 | -1.24245 | 2.48062  |
| O | -3.61501 | 0.88658  | -1.25894 |
| C | -4.68485 | 1.83536  | -1.27946 |
| H | -5.65029 | 1.32673  | -1.42396 |
| H | -4.70780 | 2.42582  | -0.34969 |
| H | -4.48088 | 2.49367  | -2.13211 |
| H | 4.03357  | 1.61577  | 1.11737  |
| O | 6.16999  | 0.17377  | 0.18703  |
| C | 6.54338  | 1.34109  | 0.91312  |
| H | 7.64031  | 1.35669  | 0.91737  |
| H | 6.16496  | 2.25333  | 0.42320  |
| H | 6.17322  | 1.30091  | 1.95076  |
| O | 0.52750  | -2.50339 | -0.69979 |

|    |          |         |          |    |          |          |          |
|----|----------|---------|----------|----|----------|----------|----------|
| C  | -0.16995 | 1.08289 | -1.45967 | O  | 0.19743  | -2.24980 | -1.31564 |
| H  | -0.35417 | 1.07317 | -2.55202 | C  | -0.32831 | 1.29654  | -1.83821 |
| H  | 0.83175  | 1.49365 | -1.29083 | H  | -1.14555 | 1.89306  | -2.24092 |
| O  | -1.11576 | 2.02939 | -0.89008 | H  | 0.67908  | 1.67982  | -1.96714 |
| H  | -2.00783 | 1.70674 | -1.15576 | O  | -0.35978 | 2.58115  | 0.01226  |
| O  | -0.53466 | 0.48321 | 1.97175  | H  | -1.10446 | 3.11347  | -0.30740 |
| H  | 0.29306  | 0.29395 | 2.44400  | O  | -0.27845 | -1.10413 | 2.16382  |
| Na | -1.20914 | 2.49376 | 1.30532  | H  | 0.32282  | -1.63505 | 1.61295  |
|    |          |         |          | Na | -0.71521 | 0.96206  | 1.37641  |

#### 1c-A-TS4

|   |          |          |          |
|---|----------|----------|----------|
| H | -1.09259 | -1.64003 | 2.18575  |
| C | 3.42881  | 0.88453  | 0.27899  |
| C | 2.14382  | 0.61629  | -0.20216 |
| C | 1.82961  | -0.62117 | -0.79708 |
| C | 2.85307  | -1.59103 | -0.88448 |
| C | 4.13601  | -1.33237 | -0.42622 |
| C | 4.43581  | -0.08749 | 0.16289  |
| H | 1.38866  | 1.40110  | -0.10381 |
| H | 2.61718  | -2.56094 | -1.32566 |
| H | 4.92838  | -2.07894 | -0.50855 |
| C | 0.46437  | -1.03085 | -1.25290 |
| C | -0.54090 | -0.03564 | -1.60687 |
| O | -1.84709 | -0.54809 | -1.79686 |
| C | -2.56391 | -0.75889 | -0.62474 |
| C | -2.59208 | -2.01411 | -0.01780 |
| C | -3.30581 | 0.31643  | -0.07377 |
| C | -3.30455 | -2.20897 | 1.17463  |
| H | -2.02625 | -2.82046 | -0.48268 |
| C | -3.99506 | 0.12283  | 1.13552  |
| C | -3.98534 | -1.13530 | 1.75452  |
| H | -3.31730 | -3.19366 | 1.64606  |
| H | -4.55408 | 0.94383  | 1.58509  |
| H | -4.52923 | -1.26953 | 2.69189  |
| O | -3.29351 | 1.47852  | -0.77294 |
| C | -3.94918 | 2.61553  | -0.21349 |
| H | -5.03080 | 2.43443  | -0.10830 |
| H | -3.51960 | 2.87768  | 0.76677  |
| H | -3.78012 | 3.43531  | -0.92155 |
| H | 3.63037  | 1.85038  | 0.74200  |
| O | 5.71312  | 0.08038  | 0.58935  |
| C | 6.07290  | 1.32597  | 1.18653  |
| H | 7.13567  | 1.23971  | 1.44274  |
| H | 5.92959  | 2.15866  | 0.47946  |
| H | 5.48633  | 1.51055  | 2.10070  |

#### 1c-A-IM5

|   |          |          |          |
|---|----------|----------|----------|
| C | 3.15676  | 1.26880  | 0.35953  |
| C | 1.92204  | 0.65747  | 0.19148  |
| C | 1.83794  | -0.70975 | -0.15554 |
| C | 3.03235  | -1.43005 | -0.34725 |
| C | 4.27639  | -0.83474 | -0.16333 |
| C | 4.34311  | 0.52627  | 0.19583  |
| H | 1.01262  | 1.25076  | 0.29724  |
| H | 2.97281  | -2.48249 | -0.63152 |
| H | 5.18298  | -1.42409 | -0.29825 |
| C | 0.55490  | -1.39823 | -0.40699 |
| C | -0.69107 | -0.90195 | 0.25933  |
| O | -1.79189 | -1.16856 | -0.52602 |
| C | -3.00980 | -0.63008 | -0.13090 |
| C | -4.00989 | -1.46603 | 0.35238  |
| C | -3.22355 | 0.75822  | -0.28159 |
| C | -5.25965 | -0.93070 | 0.69363  |
| H | -3.79676 | -2.53178 | 0.45253  |
| C | -4.47275 | 1.28770  | 0.06994  |
| C | -5.48065 | 0.44112  | 0.55280  |
| H | -6.04862 | -1.58498 | 1.06912  |
| H | -4.66599 | 2.35526  | -0.03724 |
| H | -6.44941 | 0.87022  | 0.81811  |
| O | -2.17684 | 1.47461  | -0.76513 |
| C | -2.33016 | 2.88713  | -0.89748 |
| H | -3.13311 | 3.13218  | -1.61086 |
| H | -2.54412 | 3.35345  | 0.07755  |
| H | -1.37137 | 3.25663  | -1.28032 |
| H | 3.23197  | 2.32774  | 0.61266  |
| O | 5.49869  | 1.20052  | 0.39584  |
| C | 6.73736  | 0.50543  | 0.23902  |
| H | 7.52133  | 1.24276  | 0.44823  |
| H | 6.81315  | -0.32917 | 0.95379  |
| H | 6.84921  | 0.12757  | -0.78941 |

|                 |          |          |          |    |          |          |          |
|-----------------|----------|----------|----------|----|----------|----------|----------|
| O               | 0.47716  | -2.38455 | -1.14451 | C  | -2.06865 | -0.46308 | -1.17925 |
| C               | -0.73809 | -0.39034 | 1.50087  | C  | -1.74899 | 0.90962  | -1.24820 |
| H               | 0.18286  | -0.24297 | 2.06394  | C  | -0.39108 | 1.28260  | -1.33289 |
| H               | -1.68592 | -0.13892 | 1.98265  | C  | 0.59778  | 0.30083  | -1.30224 |
| <b>1c-A-TS5</b> |          |          |          | N  | 0.24295  | -1.00105 | -1.19199 |
| C               | 4.27903  | 2.70106  | 1.69518  | H  | -3.10508 | -0.78639 | -1.09030 |
| C               | 3.20457  | 1.88810  | 2.03755  | H  | -0.11126 | 2.33232  | -1.40908 |
| C               | 1.89514  | 2.19503  | 1.60891  | Rh | 1.63212  | -2.29396 | -0.78180 |
| C               | 1.70798  | 3.38330  | 0.87879  | C  | -1.17338 | -2.86772 | -0.97943 |
| C               | 2.77298  | 4.21088  | 0.52917  | C  | -2.36469 | -3.57846 | -1.13548 |
| C               | 4.07576  | 3.85744  | 0.92029  | C  | -2.35675 | -4.96726 | -0.99364 |
| H               | 3.38901  | 1.02517  | 2.67715  | C  | -1.15979 | -5.61215 | -0.67788 |
| H               | 0.69818  | 3.65128  | 0.56443  | C  | -0.00140 | -4.85019 | -0.52999 |
| H               | 2.58639  | 5.10868  | -0.05953 | N  | -0.00242 | -3.51901 | -0.68960 |
| C               | 0.67344  | 1.41130  | 1.96077  | H  | -3.27895 | -5.53577 | -1.12252 |
| C               | 0.74484  | -0.00698 | 2.30744  | H  | -3.28432 | -3.04589 | -1.37610 |
| O               | -0.40321 | -0.42842 | 2.98538  | H  | -1.11170 | -6.69375 | -0.54813 |
| C               | -1.18054 | -1.49672 | 2.57288  | H  | 0.96210  | -5.30077 | -0.28689 |
| C               | -0.77520 | -2.82280 | 2.72538  | C  | 4.13386  | -0.57501 | -1.04915 |
| C               | -2.49080 | -1.20103 | 2.12228  | C  | 4.82064  | 0.60771  | -1.31395 |
| C               | -1.65787 | -3.87079 | 2.43245  | C  | 4.09014  | 1.75734  | -1.62480 |
| H               | 0.22462  | -3.03547 | 3.10367  | C  | 2.69625  | 1.69517  | -1.64309 |
| C               | -3.37611 | -2.25390 | 1.85464  | C  | 2.06014  | 0.48902  | -1.34026 |
| C               | -2.95563 | -3.58103 | 2.00964  | N  | 2.79370  | -0.63542 | -1.06658 |
| H               | -1.32895 | -4.90468 | 2.55079  | H  | 4.59937  | 2.69595  | -1.84784 |
| H               | -4.39107 | -2.04325 | 1.51766  | H  | 4.65067  | -1.50842 | -0.82015 |
| H               | -3.65580 | -4.38955 | 1.79063  | H  | 5.91048  | 0.61660  | -1.28169 |
| O               | -2.80383 | 0.11459  | 2.00084  | H  | 2.10229  | 2.57303  | -1.89133 |
| C               | -4.14694 | 0.46092  | 1.67363  | C  | -2.81282 | 1.93010  | -1.18049 |
| H               | -4.44075 | 0.05272  | 0.69461  | C  | -4.09857 | 1.68144  | -1.69169 |
| H               | -4.84335 | 0.09941  | 2.44797  | C  | -2.58175 | 3.16793  | -0.54228 |
| H               | -4.17263 | 1.55641  | 1.63321  | C  | -5.12493 | 2.62118  | -1.58044 |
| H               | 5.29149  | 2.46002  | 2.02394  | H  | -4.30711 | 0.73928  | -2.20278 |
| O               | 5.18775  | 4.56716  | 0.59844  | C  | -3.59570 | 4.10933  | -0.41592 |
| C               | 5.03700  | 5.73699  | -0.20532 | H  | -1.60630 | 3.37891  | -0.10082 |
| H               | 6.04921  | 6.13282  | -0.35122 | C  | -4.87728 | 3.84425  | -0.93444 |
| H               | 4.59262  | 5.48987  | -1.18290 | H  | -6.10506 | 2.39552  | -2.00006 |
| H               | 4.41607  | 6.49063  | 0.30482  | H  | -3.42045 | 5.05830  | 0.09420  |
| O               | -0.42289 | 2.00803  | 2.00697  | O  | -5.80703 | 4.82137  | -0.76563 |
| C               | 1.75416  | -0.90121 | 2.00861  | C  | -7.12678 | 4.59398  | -1.25736 |
| H               | 2.67854  | -0.52398 | 1.57755  | H  | -7.69977 | 5.49513  | -1.00764 |
| H               | 1.84453  | -1.82760 | 2.57755  | H  | -7.12364 | 4.45022  | -2.34987 |
| C               | -1.04603 | -1.40758 | -1.13878 | H  | -7.58524 | 3.71823  | -0.77034 |
|                 |          |          |          | O  | 3.04291  | -3.64301 | -0.20233 |

|                 |          |          |          |    |          |          |          |
|-----------------|----------|----------|----------|----|----------|----------|----------|
| H               | 3.68966  | -3.13849 | 0.31900  | C  | -2.32625 | -0.41078 | -1.06189 |
| H               | 1.41049  | -1.76775 | 0.76286  | C  | -1.99950 | 0.95468  | -1.21127 |
| O               | 2.02002  | -2.98225 | -2.73554 | C  | -0.65040 | 1.31868  | -1.38708 |
| H               | 2.68869  | -3.63957 | -2.47158 | C  | 0.33588  | 0.33208  | -1.37844 |
|                 |          |          |          | N  | -0.02369 | -0.95866 | -1.19649 |
| <b>1c-A-IM6</b> |          |          |          | H  | -3.35796 | -0.71554 | -0.89326 |
| C               | 5.03358  | 1.67957  | 1.89102  | H  | -0.37705 | 2.36390  | -1.52156 |
| C               | 3.73012  | 1.21623  | 2.05173  | Rh | 1.39968  | -2.27410 | -0.93200 |
| C               | 2.62929  | 1.91566  | 1.50898  | C  | -1.42594 | -2.79598 | -0.73721 |
| C               | 2.90159  | 3.14211  | 0.87515  | C  | -2.63738 | -3.47114 | -0.58430 |
| C               | 4.19967  | 3.62940  | 0.71498  | C  | -2.62629 | -4.83110 | -0.26806 |
| C               | 5.28165  | 2.87884  | 1.20040  | C  | -1.40375 | -5.48808 | -0.11420 |
| H               | 3.57599  | 0.31310  | 2.64264  | C  | -0.22435 | -4.76548 | -0.28932 |
| H               | 2.06064  | 3.71996  | 0.48916  | N  | -0.23558 | -3.46151 | -0.59601 |
| H               | 4.35885  | 4.57546  | 0.19758  | H  | -3.56663 | -5.36910 | -0.13928 |
| C               | 1.18879  | 1.50831  | 1.61006  | H  | -3.57670 | -2.93293 | -0.70456 |
| C               | 0.81866  | 0.15024  | 1.75588  | H  | -1.35317 | -6.54734 | 0.13913  |
| O               | -0.56658 | 0.03068  | 1.89158  | H  | 0.76275  | -5.22016 | -0.19058 |
| C               | -1.33483 | -1.04527 | 2.19205  | C  | 3.88318  | -0.54706 | -1.41104 |
| C               | -0.92100 | -2.33346 | 2.56023  | C  | 4.54580  | 0.63884  | -1.72050 |
| C               | -2.73291 | -0.76692 | 2.13505  | C  | 3.78778  | 1.78366  | -1.97975 |
| C               | -1.86433 | -3.33649 | 2.82494  | C  | 2.39831  | 1.72012  | -1.88449 |
| H               | 0.13181  | -2.57978 | 2.64514  | C  | 1.78826  | 0.51139  | -1.53681 |
| C               | -3.66193 | -1.77861 | 2.38989  | N  | 2.54585  | -0.61620 | -1.33862 |
| C               | -3.22822 | -3.06872 | 2.73188  | H  | 4.27483  | 2.72308  | -2.24338 |
| H               | -1.51123 | -4.33282 | 3.09819  | H  | 4.42460  | -1.47307 | -1.21203 |
| H               | -4.72864 | -1.56246 | 2.33180  | H  | 5.63502  | 0.65343  | -1.76166 |
| H               | -3.96479 | -3.85063 | 2.92702  | H  | 1.78710  | 2.60250  | -2.06930 |
| O               | -3.06310 | 0.52083  | 1.84180  | O  | 2.78760  | -3.68488 | -0.52166 |
| C               | -4.44539 | 0.85527  | 1.77225  | H  | 3.57677  | -3.47824 | -1.04975 |
| H               | -4.95704 | 0.27653  | 0.98676  | H  | 1.15040  | -1.76765 | 0.84149  |
| H               | -4.94187 | 0.67944  | 2.74085  | C  | -3.04674 | 1.98946  | -1.12098 |
| H               | -4.48593 | 1.92283  | 1.52595  | C  | -4.34638 | 1.76643  | -1.60523 |
| H               | 5.87844  | 1.12933  | 2.31022  | C  | -2.77512 | 3.21606  | -0.47738 |
| O               | 6.59009  | 3.24201  | 1.06632  | C  | -5.34947 | 2.72871  | -1.47069 |
| C               | 6.88324  | 4.43807  | 0.34902  | H  | -4.58346 | 0.82875  | -2.11248 |
| H               | 7.97668  | 4.52553  | 0.34113  | C  | -3.76589 | 4.17813  | -0.32700 |
| H               | 6.51131  | 4.38030  | -0.68726 | H  | -1.78821 | 3.38937  | -0.04376 |
| H               | 6.44809  | 5.31980  | 0.84716  | C  | -5.06190 | 3.94310  | -0.82476 |
| O               | 0.31156  | 2.43874  | 1.57517  | H  | -6.34320 | 2.52608  | -1.86959 |
| C               | 1.65837  | -1.03527 | 1.58330  | H  | -3.56330 | 5.11838  | 0.18917  |
| H               | 2.64651  | -0.77223 | 1.20093  | O  | -5.96689 | 4.93934  | -0.63276 |
| H               | 1.78724  | -1.70178 | 2.44984  | C  | -7.30302 | 4.74011  | -1.09095 |
| C               | -1.30411 | -1.35523 | -1.02921 | H  | -7.85113 | 5.65187  | -0.82435 |

|                 |          |          |          |   |          |          |          |
|-----------------|----------|----------|----------|---|----------|----------|----------|
| H               | -7.33119 | 4.59955  | -2.18351 | H | 6.87802  | 0.16872  | 0.70433  |
| H               | -7.76646 | 3.87239  | -0.59430 | C | 5.88001  | 3.44573  | -1.11365 |
| O               | 1.43642  | -2.85115 | -2.84527 | H | 3.95540  | 3.22186  | -0.20319 |
| H               | 2.06201  | -3.59641 | -2.76474 | C | 7.16937  | 2.90890  | -1.28796 |
| <b>1c-A-TS6</b> |          |          |          | H | 8.51389  | 1.29037  | -0.73082 |
| C               | 3.30383  | -1.21555 | 1.91601  | H | 5.61627  | 4.36355  | -1.64257 |
| C               | 4.33578  | -0.52658 | 1.28733  | O | 8.00318  | 3.59883  | -2.11295 |
| C               | 4.27194  | 0.87869  | 1.16711  | C | 9.31056  | 3.07673  | -2.34116 |
| C               | 3.18234  | 1.55166  | 1.75943  | H | 9.79557  | 3.77299  | -3.03605 |
| C               | 2.17944  | 0.82683  | 2.40097  | H | 9.88874  | 3.02958  | -1.40412 |
| N               | 2.25138  | -0.53103 | 2.43832  | H | 9.26280  | 2.07424  | -2.79668 |
| H               | 5.14735  | -1.08244 | 0.82008  | C | 3.30792  | -2.41187 | -1.49485 |
| H               | 3.11009  | 2.63740  | 1.70737  | C | 2.11729  | -1.96432 | -0.93578 |
| Rh              | 0.75135  | -1.52394 | 3.13846  | C | 1.74903  | -0.60041 | -0.99622 |
| C               | 3.13309  | -2.67160 | 2.01015  | C | 2.64326  | 0.28071  | -1.63709 |
| C               | 4.08869  | -3.61249 | 1.61394  | C | 3.84485  | -0.14875 | -2.19496 |
| C               | 3.79046  | -4.97209 | 1.69907  | C | 4.18833  | -1.50788 | -2.11868 |
| C               | 2.53936  | -5.36562 | 2.18953  | H | 1.51077  | -2.69023 | -0.39767 |
| C               | 1.62993  | -4.38691 | 2.57865  | H | 2.38233  | 1.33862  | -1.67529 |
| N               | 1.90790  | -3.07402 | 2.48627  | H | 4.50926  | 0.57650  | -2.66425 |
| H               | 4.52583  | -5.71582 | 1.38800  | C | 0.54788  | 0.01287  | -0.37419 |
| H               | 5.05477  | -3.27630 | 1.23748  | C | -0.48247 | -0.81956 | 0.28414  |
| H               | 2.26694  | -6.41844 | 2.27360  | O | -1.49918 | 0.07462  | 0.67984  |
| H               | 0.64238  | -4.62505 | 2.97883  | C | -2.60060 | -0.20039 | 1.42030  |
| C               | -1.01683 | 0.73389  | 4.15879  | C | -3.10690 | -1.46050 | 1.75198  |
| C               | -1.33764 | 2.06589  | 4.39673  | C | -3.29585 | 0.96335  | 1.85552  |
| C               | -0.48783 | 3.06570  | 3.90800  | C | -4.28640 | -1.57657 | 2.50059  |
| C               | 0.67397  | 2.69822  | 3.23035  | H | -2.58353 | -2.36176 | 1.44879  |
| C               | 0.96630  | 1.34250  | 3.04719  | C | -4.47866 | 0.83567  | 2.58829  |
| N               | 0.09709  | 0.37348  | 3.49616  | C | -4.97471 | -0.43658 | 2.91195  |
| H               | -0.72646 | 4.12008  | 4.05586  | H | -4.66075 | -2.57161 | 2.74851  |
| H               | -1.65566 | -0.08799 | 4.48708  | H | -5.01267 | 1.72653  | 2.91831  |
| H               | -2.25520 | 2.30946  | 4.93321  | H | -5.89918 | -0.52221 | 3.48662  |
| H               | 1.36112  | 3.45463  | 2.85046  | O | -2.71600 | 2.15053  | 1.53251  |
| O               | -0.87362 | -2.64184 | 3.76361  | C | -3.38775 | 3.34598  | 1.91445  |
| H               | -0.42057 | -2.81109 | 4.61608  | H | -4.37172 | 3.41813  | 1.42392  |
| O               | 1.30811  | -1.99435 | 5.20616  | H | -3.51911 | 3.39737  | 3.00693  |
| H               | 0.85032  | -1.28469 | 5.68795  | H | -2.74818 | 4.17182  | 1.58270  |
| H               | 0.08821  | -1.21649 | 1.48986  | H | 3.59646  | -3.46175 | -1.42273 |
| C               | 5.28540  | 1.60261  | 0.37405  | O | 5.34911  | -2.03062 | -2.59942 |
| C               | 6.58030  | 1.08534  | 0.19158  | C | 6.29235  | -1.13954 | -3.19353 |
| C               | 4.95931  | 2.80282  | -0.29530 | H | 7.14866  | -1.75919 | -3.48618 |
| C               | 7.51949  | 1.72272  | -0.62284 | H | 5.86866  | -0.65150 | -4.08608 |
|                 |          |          |          | H | 6.61969  | -0.37257 | -2.47319 |





|   |          |          |          |                  |          |          |          |
|---|----------|----------|----------|------------------|----------|----------|----------|
| H | -0.00899 | -2.94807 | -2.43280 | H                | 4.02552  | -4.48487 | 0.92702  |
| H | 4.17362  | -2.04399 | -3.06672 | O                | 5.55224  | -3.23591 | -0.97150 |
| H | 3.69333  | 0.30624  | -2.28658 | C                | 5.38413  | -4.63155 | -1.21451 |
| C | 0.48596  | 4.58130  | -0.27531 | H                | 5.96515  | -4.85159 | -2.11816 |
| C | -0.36561 | 5.55715  | 0.23602  | H                | 5.76981  | -5.23049 | -0.37406 |
| C | -1.71913 | 5.25086  | 0.40789  | H                | 4.32332  | -4.87481 | -1.38742 |
| C | -2.17772 | 3.97746  | 0.07031  | O                | 1.91082  | -1.34268 | 3.90601  |
| C | -1.27634 | 3.03258  | -0.42715 | C                | 1.97901  | 1.46151  | 4.39454  |
| N | 0.04822  | 3.35245  | -0.59702 | H                | 1.06044  | 0.92258  | 4.66646  |
| H | -2.41224 | 5.99539  | 0.80270  | H                | 2.62192  | 1.49306  | 5.29706  |
| H | 1.55056  | 4.75779  | -0.43880 | H                | 1.74010  | 2.50454  | 4.13877  |
| H | 0.03275  | 6.53996  | 0.49031  |                  |          |          |          |
| H | -3.22664 | 3.71124  | 0.19830  |                  |          |          |          |
| O | 1.11401  | 2.48202  | -3.34093 | <b>1c-A-TS3a</b> |          |          |          |
| H | 1.06902  | 3.44611  | -3.21803 | C                | 4.14098  | 0.65424  | -0.62431 |
| H | 1.48798  | 1.36272  | 0.34107  | C                | 2.82110  | 0.49524  | -1.06715 |
| C | 4.10562  | -3.39967 | 0.99063  | C                | 1.99552  | -0.51500 | -0.55631 |
| C | 3.42971  | -2.71404 | 2.00084  | C                | 2.53322  | -1.39152 | 0.40654  |
| C | 3.48448  | -1.31479 | 2.11371  | C                | 3.83531  | -1.23709 | 0.87121  |
| C | 4.27385  | -0.60802 | 1.18020  | C                | 4.64890  | -0.20911 | 0.35824  |
| C | 4.96564  | -1.27500 | 0.17794  | H                | 2.44036  | 1.17055  | -1.83745 |
| C | 4.87576  | -2.67518 | 0.06529  | H                | 1.91143  | -2.19940 | 0.80020  |
| H | 2.82254  | -3.26969 | 2.71737  | H                | 4.24741  | -1.90299 | 1.63236  |
| H | 4.33490  | 0.48030  | 1.21272  | C                | 0.59136  | -0.76830 | -1.04937 |
| H | 5.56563  | -0.72688 | -0.55036 | C                | -0.38974 | 0.22190  | -0.81556 |
| C | 2.66224  | -0.65283 | 3.16587  | H                | -0.42307 | -0.19298 | 0.89410  |
| C | 2.70137  | 0.78174  | 3.29311  | O                | -1.67264 | -0.00629 | -1.41993 |
| O | 1.51409  | 1.09840  | 1.49412  | C                | -2.64183 | -0.55470 | -0.60364 |
| C | 0.21208  | 0.86090  | 1.87637  | C                | -2.68653 | -1.92826 | -0.35949 |
| C | -0.57146 | 1.87914  | 2.42554  | C                | -3.62060 | 0.29080  | -0.03551 |
| C | -0.33147 | -0.43711 | 1.70758  | C                | -3.70695 | -2.47568 | 0.42808  |
| C | -1.88288 | 1.61994  | 2.83945  | H                | -1.90426 | -2.54481 | -0.80500 |
| H | -0.13516 | 2.87584  | 2.51373  | C                | -4.64548 | -0.25665 | 0.74522  |
| C | -1.63822 | -0.69929 | 2.13946  | C                | -4.68445 | -1.63901 | 0.97233  |
| C | -2.40524 | 0.33064  | 2.69956  | H                | -3.73662 | -3.55218 | 0.60926  |
| H | -2.49086 | 2.42161  | 3.26290  | H                | -5.40794 | 0.38701  | 1.18432  |
| H | -2.07123 | -1.69218 | 2.01769  | H                | -5.48826 | -2.05468 | 1.58392  |
| H | -3.42787 | 0.11574  | 3.01762  | O                | -3.47768 | 1.63230  | -0.28713 |
| O | 0.47387  | -1.33884 | 1.09928  | C                | -4.50087 | 2.52136  | 0.17385  |
| C | 0.06560  | -2.70169 | 1.06661  | H                | -5.47170 | 2.24952  | -0.26746 |
| H | -0.07415 | -3.08480 | 2.09003  | H                | -4.56922 | 2.50894  | 1.27263  |
| H | -0.86645 | -2.82665 | 0.49300  | H                | -4.20150 | 3.51907  | -0.16794 |
| H | 0.87710  | -3.24747 | 0.57252  | H                | 4.75793  | 1.44560  | -1.05024 |
| H | 3.49817  | 1.33326  | 2.79651  | O                | 5.91149  | -0.13123 | 0.86989  |
|   |          |          |          | C                | 6.77036  | 0.89960  | 0.39011  |

|                 |          |          |          |   |           |          |          |
|-----------------|----------|----------|----------|---|-----------|----------|----------|
| H               | 7.71528  | 0.78296  | 0.93498  | H | -1.70762  | 3.56830  | 0.55852  |
| H               | 6.95490  | 0.79386  | -0.69156 | O | 1.34900   | 3.59920  | 2.34372  |
| H               | 6.34836  | 1.89712  | 0.59547  | H | 0.66085   | 4.22978  | 2.62991  |
| O               | 0.35171  | -1.91210 | -1.54072 | C | 4.67480   | -1.66709 | 0.18798  |
| C               | -0.15955 | 1.67607  | -0.55332 | C | 5.40647   | -1.77931 | -1.00876 |
| H               | -0.43798 | 2.29461  | -1.42199 | C | 4.85614   | -2.66797 | 1.16814  |
| H               | 0.88329  | 1.87765  | -0.28914 | C | 6.28549   | -2.83944 | -1.23333 |
| O               | -0.94632 | 2.18639  | 0.58534  | H | 5.27125   | -1.04136 | -1.80171 |
| H               | -1.89695 | 2.12091  | 0.31389  | C | 5.73377   | -3.72411 | 0.96271  |
| H               | -0.76029 | 1.16109  | 1.55834  | H | 4.31800   | -2.60887 | 2.11600  |
| O               | -0.55485 | 0.15319  | 1.89016  | C | 6.45564   | -3.82129 | -0.24254 |
| H               | 0.34067  | 0.15665  | 2.28491  | H | 6.82237   | -2.89769 | -2.17965 |
|                 |          |          |          | H | 5.88139   | -4.48879 | 1.72739  |
|                 |          |          |          | O | 7.28524   | -4.88899 | -0.36150 |
| <b>1c-B-TS3</b> |          |          |          | C | 8.04083   | -5.03176 | -1.56432 |
| C               | 1.64341  | 0.27117  | 1.33003  | H | 8.71586   | -4.17345 | -1.71102 |
| C               | 2.58462  | -0.74811 | 1.21576  | H | 8.63160   | -5.94721 | -1.44003 |
| C               | 3.71401  | -0.56606 | 0.38789  | H | 7.37745   | -5.13594 | -2.43781 |
| C               | 3.87246  | 0.66878  | -0.27694 | H | -0.90374  | 2.11414  | -1.42854 |
| C               | 2.90883  | 1.66429  | -0.11906 | O | -0.04031  | 2.01938  | -2.00733 |
| N               | 1.83829  | 1.42887  | 0.66421  | H | 0.15557   | 2.93214  | -2.27123 |
| H               | 2.42539  | -1.69275 | 1.73090  | C | -2.62744  | -0.06586 | -1.53828 |
| H               | 4.74387  | 0.85080  | -0.90447 | H | -2.00314  | 0.28583  | -2.37262 |
| Rh              | 0.45237  | 2.80424  | 0.79396  | C | -2.25502  | 0.75740  | -0.26633 |
| C               | 0.38152  | 0.24945  | 2.09943  | H | -1.33478  | 0.24317  | 0.09075  |
| C               | -0.07699 | -0.84351 | 2.83643  | H | -3.03111  | 0.55649  | 0.50369  |
| C               | -1.30002 | -0.74984 | 3.50534  | O | -2.08350  | 2.09947  | -0.51881 |
| C               | -2.02732 | 0.44022  | 3.44304  | C | -7.58945  | -1.03568 | -1.40076 |
| C               | -1.52053 | 1.49961  | 2.69113  | C | -6.46853  | -0.37970 | -1.90088 |
| N               | -0.36064 | 1.39794  | 2.03260  | C | -5.18842  | -0.56852 | -1.34441 |
| H               | -1.67675 | -1.60216 | 4.07279  | C | -5.06355  | -1.43806 | -0.23584 |
| H               | 0.51170  | -1.75925 | 2.87614  | C | -6.17539  | -2.08752 | 0.28250  |
| H               | -2.98217 | 0.55263  | 3.95711  | C | -7.44510  | -1.89986 | -0.29823 |
| H               | -2.04128 | 2.45224  | 2.57970  | H | -6.57318  | 0.29720  | -2.75092 |
| C               | 1.64460  | 4.99052  | -0.97290 | H | -4.09153  | -1.60689 | 0.22371  |
| C               | 2.60873  | 5.53782  | -1.81954 | H | -6.08575  | -2.75503 | 1.14161  |
| C               | 3.74046  | 4.78153  | -2.12706 | C | -4.06255  | 0.19213  | -1.93614 |
| C               | 3.87771  | 3.50237  | -1.58263 | H | -8.56241  | -0.87567 | -1.86490 |
| C               | 2.88131  | 3.00615  | -0.74047 | O | -8.46623  | -2.58785 | 0.26471  |
| N               | 1.77871  | 3.76522  | -0.44887 | C | -9.77588  | -2.44571 | -0.28792 |
| H               | 4.51319  | 5.17966  | -2.78655 | H | -10.42616 | -3.08954 | 0.31613  |
| H               | 0.73441  | 5.52836  | -0.70276 | H | -10.12137 | -1.40216 | -0.21947 |
| H               | 2.46326  | 6.53936  | -2.22526 | H | -9.79838  | -2.77756 | -1.33793 |
| H               | 4.75144  | 2.89206  | -1.80991 | O | -4.26713  | 1.12276  | -2.72343 |
| O               | -1.03014 | 4.16183  | 0.96472  |   |           |          |          |

|                 |          |          |          |   |          |          |          |
|-----------------|----------|----------|----------|---|----------|----------|----------|
| O               | -2.40490 | -1.46008 | -1.28673 | H | -1.54296 | 4.90919  | -1.03293 |
| C               | -1.10792 | -1.87516 | -1.10469 | H | -0.62122 | 5.95632  | -3.14043 |
| C               | -0.04716 | -1.49201 | -1.92978 | H | 2.74997  | 3.26277  | -2.82100 |
| C               | -0.88393 | -2.79067 | -0.04746 | O | -2.40899 | 3.56181  | 1.07067  |
| C               | 1.22751  | -2.04495 | -1.74291 | H | -2.92658 | 3.02615  | 0.44229  |
| H               | -0.21681 | -0.76174 | -2.72175 | O | 0.23869  | 4.07033  | 2.03032  |
| C               | 0.38494  | -3.36008 | 0.11481  | H | -0.25336 | 3.99802  | 2.86587  |
| C               | 1.43532  | -2.98964 | -0.73718 | C | 4.62909  | -0.48069 | -0.12141 |
| H               | 2.05186  | -1.73526 | -2.38874 | C | 5.13538  | -0.62557 | -1.42639 |
| H               | 0.56510  | -4.07774 | 0.91535  | C | 5.30802  | -1.14502 | 0.92374  |
| H               | 2.42253  | -3.43299 | -0.59206 | C | 6.26244  | -1.40295 | -1.69496 |
| O               | -1.95592 | -3.04601 | 0.75394  | H | 4.62368  | -0.15163 | -2.26586 |
| C               | -1.80222 | -4.00238 | 1.79908  | C | 6.43536  | -1.91657 | 0.67405  |
| H               | -1.57093 | -4.99879 | 1.38855  | H | 4.96212  | -1.04385 | 1.95391  |
| H               | -1.01105 | -3.70350 | 2.50440  | C | 6.92164  | -2.05650 | -0.63970 |
| H               | -2.76627 | -4.03341 | 2.32097  | H | 6.61104  | -1.50174 | -2.72264 |
|                 |          |          |          | H | 6.96273  | -2.41958 | 1.48651  |
|                 |          |          |          | O | 8.02341  | -2.83455 | -0.79289 |
| <b>1c-B-IM4</b> |          |          |          | C | 8.56016  | -3.00149 | -2.10478 |
| C               | 1.42850  | 0.75291  | 1.46854  | H | 8.87565  | -2.03469 | -2.52875 |
| C               | 2.59397  | 0.02016  | 1.25862  | H | 9.43299  | -3.65549 | -1.99077 |
| C               | 3.40531  | 0.30218  | 0.13689  | H | 7.82652  | -3.47824 | -2.77446 |
| C               | 3.00001  | 1.32926  | -0.74315 | C | -1.56528 | -0.80950 | -1.41815 |
| C               | 1.82410  | 2.03397  | -0.49012 | H | -0.78506 | -0.43509 | -2.09959 |
| N               | 1.08943  | 1.72967  | 0.60012  | C | -1.50245 | 0.01669  | -0.11736 |
| H               | 2.85347  | -0.78746 | 1.94032  | H | -0.54242 | -0.28083 | 0.34696  |
| H               | 3.60518  | 1.58366  | -1.61231 | H | -2.30542 | -0.31944 | 0.57107  |
| Rh              | -0.60777 | 2.64728  | 0.85348  | O | -1.57263 | 1.37236  | -0.41284 |
| C               | 0.41814  | 0.55285  | 2.52839  | C | -6.52977 | -1.58864 | -2.02047 |
| C               | 0.51416  | -0.40755 | 3.53582  | C | -5.31566 | -1.01961 | -2.38878 |
| C               | -0.53371 | -0.54593 | 4.44923  | C | -4.12612 | -1.28750 | -1.68228 |
| C               | -1.65838 | 0.27245  | 4.33031  | C | -4.18985 | -2.16111 | -0.57144 |
| C               | -1.69908 | 1.21576  | 3.30408  | C | -5.39597 | -2.73162 | -0.18936 |
| N               | -0.68934 | 1.35590  | 2.43513  | C | -6.57526 | -2.45236 | -0.90821 |
| H               | -0.47232 | -1.29373 | 5.24122  | H | -5.27162 | -0.34298 | -3.24414 |
| H               | 1.39648  | -1.04396 | 3.59730  | H | -3.28932 | -2.39839 | -0.00761 |
| H               | -2.50049 | 0.18754  | 5.01774  | H | -5.45256 | -3.40323 | 0.66919  |
| H               | -2.55180 | 1.87884  | 3.14902  | C | -2.89361 | -0.60215 | -2.12803 |
| C               | -0.59419 | 4.59455  | -1.47197 | H | -7.42985 | -1.36024 | -2.59071 |
| C               | -0.07432 | 5.15903  | -2.63625 | O | -7.70198 | -3.05374 | -0.46297 |
| C               | 1.14176  | 4.68199  | -3.13015 | C | -8.93137 | -2.80281 | -1.14725 |
| C               | 1.80161  | 3.65374  | -2.45317 | H | -9.69309 | -3.38421 | -0.61450 |
| C               | 1.23330  | 3.12554  | -1.29228 | H | -9.18963 | -1.73279 | -1.11171 |
| N               | 0.04438  | 3.61422  | -0.82032 | H | -8.87412 | -3.13846 | -2.19463 |
| H               | 1.57621  | 5.10363  | -4.03791 |   |          |          |          |

|                 |          |          |          |   |          |          |          |
|-----------------|----------|----------|----------|---|----------|----------|----------|
| O               | -2.91873 | 0.23334  | -3.03712 | H | -1.46869 | 5.79048  | 1.38513  |
| O               | -1.34087 | -2.19936 | -1.13283 | H | 2.34393  | 4.29317  | -0.00419 |
| C               | -0.07341 | -2.51695 | -0.68595 | H | 1.02270  | 6.10005  | 1.12684  |
| C               | 1.03747  | -2.43651 | -1.52667 | H | -2.52369 | 3.70208  | 0.50846  |
| C               | 0.06709  | -2.99040 | 0.63863  | O | 3.53765  | 2.19833  | -1.40995 |
| C               | 2.29701  | -2.84749 | -1.07297 | H | 3.71928  | 2.69080  | -0.59185 |
| H               | 0.90007  | -2.06657 | -2.54490 | O | 1.31192  | 2.39668  | -2.99923 |
| C               | 1.32816  | -3.41159 | 1.08429  | H | 2.19186  | 2.80960  | -3.10223 |
| C               | 2.43492  | -3.33688 | 0.22812  | C | -4.15906 | -0.64997 | -1.14943 |
| H               | 3.16143  | -2.78896 | -1.73625 | C | -5.05368 | -0.18293 | -0.16779 |
| H               | 1.45241  | -3.78695 | 2.10019  | C | -4.61489 | -1.65916 | -2.02708 |
| H               | 3.41242  | -3.66134 | 0.59097  | C | -6.34676 | -0.69343 | -0.05032 |
| O               | -1.06177 | -2.99521 | 1.39888  | H | -4.73280 | 0.57546  | 0.54804  |
| C               | -1.02256 | -3.66243 | 2.65898  | C | -5.90104 | -2.17212 | -1.92712 |
| H               | -0.79506 | -4.73238 | 2.52409  | H | -3.96164 | -2.03660 | -2.81575 |
| H               | -0.27978 | -3.21104 | 3.33295  | C | -6.77928 | -1.69654 | -0.93429 |
| H               | -2.02406 | -3.54639 | 3.09014  | H | -7.00074 | -0.31487 | 0.73479  |
|                 |          |          |          | H | -6.25259 | -2.94423 | -2.61378 |
|                 |          |          |          | O | -8.01304 | -2.26036 | -0.90433 |
| <b>1c-B-TS4</b> |          |          |          | C | -8.94020 | -1.81679 | 0.08642  |
| C               | -0.45033 | -0.35684 | -1.83869 | H | -9.16207 | -0.74406 | -0.03155 |
| C               | -1.74632 | -0.86818 | -1.81965 | H | -9.85388 | -2.40116 | -0.07540 |
| C               | -2.78797 | -0.11390 | -1.23641 | H | -8.55495 | -2.00685 | 1.10100  |
| C               | -2.47968 | 1.15813  | -0.70738 | C | -2.30858 | -1.02152 | 2.10222  |
| C               | -1.16672 | 1.61957  | -0.73916 | C | -1.07058 | -1.29657 | 1.52496  |
| N               | -0.20657 | 0.84992  | -1.28954 | C | -0.02342 | -0.35752 | 1.53465  |
| H               | -1.93903 | -1.86141 | -2.22127 | C | -0.25654 | 0.89578  | 2.14043  |
| H               | -3.25974 | 1.78202  | -0.27573 | C | -1.49156 | 1.18848  | 2.70809  |
| Rh              | 1.63919  | 1.50774  | -1.26290 | C | -2.52615 | 0.23524  | 2.69340  |
| C               | 0.76896  | -1.00358 | -2.36348 | H | -0.89458 | -2.26506 | 1.05422  |
| C               | 0.80354  | -2.26895 | -2.94977 | H | 0.53197  | 1.65150  | 2.18404  |
| C               | 2.02612  | -2.78924 | -3.37940 | H | -1.67699 | 2.15794  | 3.17411  |
| C               | 3.18690  | -2.03068 | -3.22197 | C | 1.26329  | -0.75852 | 0.90090  |
| C               | 3.09139  | -0.76999 | -2.63387 | C | 2.40667  | 0.16590  | 0.92890  |
| N               | 1.91972  | -0.27565 | -2.21783 | O | 3.61211  | -0.31688 | 0.40632  |
| H               | 2.06756  | -3.78071 | -3.83296 | C | 4.16934  | -1.53047 | 0.71805  |
| H               | -0.11613 | -2.84287 | -3.05936 | C | 5.14343  | -1.98673 | -0.17873 |
| H               | 4.15998  | -2.40186 | -3.54388 | C | 3.88072  | -2.30149 | 1.87218  |
| H               | 3.95815  | -0.12577 | -2.48534 | C | 5.78825  | -3.21246 | 0.01189  |
| C               | 1.26630  | 4.20606  | 0.13616  | H | 5.37750  | -1.36099 | -1.04097 |
| C               | 0.52082  | 5.20464  | 0.75954  | C | 4.51126  | -3.54272 | 2.03925  |
| C               | -0.85726 | 5.02830  | 0.89968  | C | 5.45900  | -4.00146 | 1.11656  |
| C               | -1.45083 | 3.86402  | 0.41037  | H | 6.53565  | -3.54710 | -0.71055 |
| C               | -0.65317 | 2.89590  | -0.20346 | H | 4.26852  | -4.14813 | 2.91335  |
| N               | 0.69700  | 3.08424  | -0.32563 |   |          |          |          |



|                 |          |          |          |   |          |          |          |
|-----------------|----------|----------|----------|---|----------|----------|----------|
| H               | -4.24661 | -1.56628 | 4.64485  | H | 2.66975  | -5.81307 | -1.01509 |
| H               | -5.74823 | 0.34208  | 5.13636  | H | -1.20059 | -4.09297 | -1.94089 |
| O               | -3.10254 | -2.04262 | 2.23768  | H | 0.25333  | -6.14113 | -1.66054 |
| C               | -2.58061 | -2.87732 | 3.26671  | H | 3.53581  | -3.49148 | -0.70184 |
| H               | -2.03780 | -2.28113 | 4.01791  | O | -2.41240 | -1.95664 | -2.33802 |
| H               | -3.38103 | -3.45418 | 3.75752  | H | -3.16487 | -1.43132 | -1.96201 |
| H               | -1.88588 | -3.56616 | 2.77080  | C | 4.77751  | 1.28124  | -0.11451 |
| H               | 2.96201  | -0.81789 | 2.55724  | C | 5.66931  | 0.52440  | 0.66839  |
| O               | 3.41704  | -3.27406 | 1.44340  | C | 5.17469  | 2.58462  | -0.48791 |
| C               | 4.47043  | -2.85311 | 2.31220  | C | 6.90546  | 1.03123  | 1.07051  |
| H               | 5.24687  | -3.62374 | 2.23491  | H | 5.38911  | -0.47780 | 0.99802  |
| H               | 4.88480  | -1.88261 | 2.00071  | C | 6.40478  | 3.10042  | -0.10142 |
| H               | 4.11421  | -2.78789 | 3.35264  | H | 4.52232  | 3.19816  | -1.11205 |
| O               | -1.49728 | 0.73574  | 1.72620  | C | 7.28251  | 2.32839  | 0.68329  |
| H               | -2.45722 | -1.69042 | -0.22982 | H | 7.56066  | 0.41610  | 1.68665  |
|                 |          |          |          | H | 6.71315  | 4.10288  | -0.40368 |
|                 |          |          |          | O | 8.46175  | 2.91243  | 1.01679  |
| <b>1c-B-TS5</b> |          |          |          | C | 9.39308  | 2.16554  | 1.79917  |
| O               | -0.22372 | -1.03551 | -3.65096 | H | 9.70341  | 1.24773  | 1.27439  |
| H               | -1.03495 | -1.45412 | -4.00291 | H | 10.26113 | 2.82101  | 1.93837  |
| C               | 1.15648  | 1.03647  | -1.18836 | H | 8.96592  | 1.90521  | 2.78091  |
| C               | 2.38177  | 1.58313  | -0.81186 | O | -0.33491 | -0.18320 | 1.18616  |
| C               | 3.47075  | 0.73076  | -0.52684 | H | 0.07999  | -1.01641 | 1.46557  |
| C               | 3.27675  | -0.66363 | -0.63826 | H | -1.17596 | -0.48609 | 0.76730  |
| C               | 2.03081  | -1.15954 | -1.01757 | C | -5.05321 | 3.33067  | 0.33304  |
| N               | 1.02551  | -0.30075 | -1.28342 | C | -4.96774 | 1.96717  | 0.03767  |
| H               | 2.48420  | 2.66275  | -0.71221 | C | -3.92304 | 1.16361  | 0.52351  |
| H               | 4.09667  | -1.35295 | -0.44241 | C | -2.94271 | 1.77988  | 1.33023  |
| Rh              | -0.72418 | -1.04997 | -1.75605 | C | -3.00008 | 3.13988  | 1.61678  |
| C               | -0.09400 | 1.75885  | -1.49149 | C | -4.05416 | 3.92779  | 1.11819  |
| C               | -0.22794 | 3.14613  | -1.43360 | H | -5.72336 | 1.50992  | -0.60425 |
| C               | -1.45284 | 3.73209  | -1.76608 | H | -2.09556 | 1.20156  | 1.69804  |
| C               | -2.51121 | 2.91511  | -2.16049 | H | -2.22296 | 3.62050  | 2.21478  |
| C               | -2.32654 | 1.53163  | -2.18239 | C | -3.83072 | -0.24958 | 0.04006  |
| N               | -1.15780 | 0.96844  | -1.84774 | C | -3.18144 | -1.24653 | 0.76947  |
| H               | -1.57177 | 4.81571  | -1.72002 | H | -5.88232 | 3.91722  | -0.06331 |
| H               | 0.62044  | 3.76009  | -1.13150 | O | -4.01946 | 5.25311  | 1.43968  |
| H               | -3.48193 | 3.32951  | -2.43176 | C | -5.04880 | 6.09609  | 0.92983  |
| H               | -3.13496 | 0.84084  | -2.42562 | H | -4.82139 | 7.10526  | 1.29485  |
| C               | -0.14492 | -4.02567 | -1.67296 | H | -5.05309 | 6.09629  | -0.17259 |
| C               | 0.67037  | -5.14474 | -1.51232 | H | -6.03918 | 5.78601  | 1.30136  |
| C               | 2.00668  | -4.95772 | -1.15372 | O | -4.34403 | -0.49951 | -1.12432 |
| C               | 2.49491  | -3.66086 | -0.97642 | H | -3.17373 | -2.26939 | 0.39509  |
| C               | 1.63616  | -2.57575 | -1.16144 | O | -3.10177 | -1.10346 | 2.16994  |
| N               | 0.32440  | -2.78320 | -1.49938 |   |          |          |          |

|                 |           |          |          |   |          |          |          |
|-----------------|-----------|----------|----------|---|----------|----------|----------|
| C               | -2.11977  | -1.64491 | 2.95096  | C | 0.44754  | -2.54852 | -2.40686 |
| C               | -1.48577  | -2.89281 | 2.71622  | C | 1.68478  | -3.06644 | -2.79373 |
| C               | -1.77132  | -0.90429 | 4.08700  | C | 2.78933  | -2.21459 | -2.85532 |
| C               | -0.49495  | -3.32927 | 3.60917  | C | 2.62299  | -0.87362 | -2.51443 |
| C               | -0.80022  | -1.35860 | 4.98341  | N | 1.44345  | -0.37758 | -2.11162 |
| H               | -2.28061  | 0.04954  | 4.23979  | H | 1.78043  | -4.12274 | -3.05002 |
| C               | -0.15153  | -2.57034 | 4.73522  | H | -0.43344 | -3.18823 | -2.36430 |
| H               | 0.00632   | -4.28071 | 3.43155  | H | 3.77478  | -2.57576 | -3.15022 |
| H               | -0.54636  | -0.75883 | 5.85997  | H | 3.44998  | -0.16534 | -2.56273 |
| H               | 0.61919   | -2.93990 | 5.41493  | C | 0.57002  | 4.34872  | -0.44462 |
| O               | -1.88709  | -3.61899 | 1.63104  | C | -0.20492 | 5.37566  | 0.08824  |
| C               | -1.33554  | -4.92076 | 1.45454  | C | -1.57433 | 5.16323  | 0.27365  |
| H               | -1.81990  | -5.33196 | 0.56125  | C | -2.12313 | 3.92665  | -0.06485 |
| H               | -0.24677  | -4.87588 | 1.29528  | C | -1.29486 | 2.92634  | -0.58178 |
| H               | -1.55605  | -5.56166 | 2.32405  | N | 0.04270  | 3.15954  | -0.77796 |
| <b>1c-C-TS3</b> |           |          |          | H | -2.20922 | 5.95040  | 0.68327  |
| O               | 2.89310   | 2.39398  | -1.49856 | H | 1.64183  | 4.45739  | -0.61577 |
| H               | 3.54613   | 1.67594  | -1.46298 | H | 0.26531  | 6.32454  | 0.34822  |
| C               | -4.49039  | -1.00669 | -0.52779 | H | -3.18491 | 3.73033  | 0.08173  |
| C               | -5.69146  | -0.27401 | -0.53437 | O | 0.96525  | 2.20555  | -3.52991 |
| C               | -4.54999  | -2.36470 | -0.14269 | H | 1.84446  | 2.62689  | -3.49185 |
| C               | -6.90926  | -0.85888 | -0.18282 | H | 1.36550  | 1.09844  | 0.13604  |
| H               | -5.68863  | 0.77349  | -0.84207 | C | 4.50152  | -3.28769 | 1.35679  |
| C               | -5.75315  | -2.95870 | 0.21683  | C | 3.78867  | -2.52637 | 2.28414  |
| H               | -3.63563  | -2.95958 | -0.09780 | C | 3.52389  | -1.16009 | 2.08393  |
| C               | -6.94564  | -2.21106 | 0.19751  | C | 3.99834  | -0.56770 | 0.89211  |
| H               | -7.81882  | -0.25949 | -0.21314 | C | 4.72138  | -1.30810 | -0.03433 |
| H               | -5.79275  | -4.00449 | 0.52696  | C | 4.96983  | -2.67572 | 0.18198  |
| O               | -8.07592  | -2.87281 | 0.55969  | H | 3.41101  | -3.00106 | 3.19145  |
| C               | -9.31000  | -2.15659 | 0.56182  | H | 3.76439  | 0.46699  | 0.64590  |
| H               | -9.55431  | -1.78553 | -0.44662 | H | 5.08410  | -0.84962 | -0.95504 |
| H               | -10.07345 | -2.87498 | 0.88386  | C | 2.65656  | -0.47078 | 3.08622  |
| H               | -9.27647  | -1.31218 | 1.26896  | C | 2.52867  | 0.96466  | 3.15013  |
| C               | -0.89656  | -0.54579 | -1.61513 | H | 1.74106  | 1.28995  | 3.83688  |
| C               | -2.13271  | -1.14443 | -1.37983 | H | 4.68280  | -4.34464 | 1.55159  |
| C               | -3.20233  | -0.37632 | -0.87567 | O | 5.64887  | -3.32279 | -0.80165 |
| C               | -2.98786  | 0.99865  | -0.64466 | C | 5.87248  | -4.72531 | -0.66155 |
| C               | -1.73528  | 1.55516  | -0.88892 | H | 6.41371  | -5.03463 | -1.56373 |
| N               | -0.73307  | 0.77713  | -1.37078 | H | 6.48468  | -4.94208 | 0.22839  |
| H               | -2.26501  | -2.20691 | -1.57816 | H | 4.91789  | -5.27199 | -0.59745 |
| H               | -3.77814  | 1.61402  | -0.21811 | O | 1.95091  | -1.17075 | 3.86063  |
| Rh              | 1.04185   | 1.54553  | -1.52160 | C | 3.50802  | 2.03018  | 2.78140  |
| C               | 0.34383   | -1.19791 | -2.06563 | H | 4.02112  | 2.36355  | 3.70238  |
|                 |           |          |          | H | 4.29153  | 1.66275  | 2.10040  |



|                 |          |          |          |                  |          |          |          |          |
|-----------------|----------|----------|----------|------------------|----------|----------|----------|----------|
| O               | 2.84664  | 3.17610  | 2.24810  | H                | 3.65869  | 0.72847  | -0.94824 |          |
| H               | 2.18344  | 2.80234  | 1.63345  |                  |          |          |          |          |
| O               | 1.40732  | 1.05641  | 1.33346  |                  |          |          |          |          |
| C               | 0.11556  | 0.81472  | 1.75323  | <b>1c-C-TS4a</b> | H        | -2.37539 | 0.08140  | -0.89302 |
| C               | -0.66388 | 1.82820  | 2.31197  | C                | 1.76403  | -0.87691 | -0.21530 |          |
| C               | -0.39617 | -0.49733 | 1.62471  | C                | 0.49937  | -0.28748 | -0.30506 |          |
| C               | -1.95948 | 1.54785  | 2.75894  | C                | 0.31679  | 1.09151  | -0.11242 |          |
| H               | -0.23185 | 2.82758  | 2.39212  | C                | 1.45234  | 1.88112  | 0.15526  |          |
| C               | -1.68941 | -0.77852 | 2.08454  | C                | 2.71465  | 1.30948  | 0.26882  |          |
| C               | -2.46253 | 0.24703  | 2.64339  | C                | 2.87880  | -0.07727 | 0.08693  |          |
| H               | -2.57132 | 2.34117  | 3.19240  | H                | -0.35889 | -0.90567 | -0.57570 |          |
| H               | -2.10269 | -1.78303 | 1.99240  | H                | 1.32850  | 2.95888  | 0.28267  |          |
| H               | -3.47417 | 0.01936  | 2.98650  | H                | 3.59391  | 1.91624  | 0.49516  |          |
| O               | 0.43020  | -1.38813 | 1.02767  | C                | -1.02217 | 1.75929  | -0.25254 |          |
| C               | 0.10164  | -2.77197 | 1.08867  | C                | -2.22408 | 1.03448  | 0.11106  |          |
| H               | 0.00769  | -3.09493 | 2.13784  | H                | 1.87090  | -1.94772 | -0.38881 |          |
| H               | -0.83252 | -2.98721 | 0.54577  | O                | 4.14874  | -0.55283 | 0.21374  |          |
| H               | 0.93570  | -3.29901 | 0.61100  | C                | 4.36724  | -1.95155 | 0.04467  |          |
|                 |          |          |          | H                | 5.44176  | -2.10925 | 0.19854  |          |
|                 |          |          |          | H                | 3.79958  | -2.53521 | 0.78761  |          |
| <b>1c-C-IM4</b> |          |          |          | H                | 4.08951  | -2.27777 | -0.97080 |          |
| H               | 4.19744  | -2.11418 | -0.17121 | O                | -1.04495 | 2.91075  | -0.75322 |          |
| C               | -2.07837 | 0.92438  | 0.21824  | C                | -2.24245 | 0.23063  | 1.39884  |          |
| C               | -0.76308 | 1.36976  | 0.13383  | H                | -2.42900 | 0.87148  | 2.27951  |          |
| C               | 0.28928  | 0.50324  | -0.21922 | H                | -1.28603 | -0.28338 | 1.56494  |          |
| C               | -0.01930 | -0.84870 | -0.48859 | O                | -3.24493 | -0.81856 | 1.40722  |          |
| C               | -1.32617 | -1.30972 | -0.40758 | H                | -4.11513 | -0.38499 | 1.42173  |          |
| C               | -2.36685 | -0.42732 | -0.05523 | O                | -2.57579 | -0.88233 | -1.68870 |          |
| H               | -0.52920 | 2.41466  | 0.34588  | H                | -1.81311 | -0.83063 | -2.28696 |          |
| H               | 0.76791  | -1.55082 | -0.76764 | Na               | -3.08567 | -2.38131 | -0.22371 |          |
| H               | -1.57133 | -2.35263 | -0.61569 | H                | -3.09588 | 1.70494  | 0.03200  |          |
| C               | 1.66728  | 1.04573  | -0.28287 |                  |          |          |          |          |
| C               | 2.82610  | 0.11556  | -0.57547 |                  |          |          |          |          |
| H               | 2.55945  | -0.62559 | -1.34446 | <b>1c-C-IM5a</b> | H        | -2.49589 | -0.00191 | -1.10194 |
| H               | -2.86972 | 1.62069  | 0.49478  | C                | 1.71821  | -0.85042 | -0.14962 |          |
| O               | -3.60875 | -0.96166 | -0.00452 | C                | 0.43603  | -0.29046 | -0.20684 |          |
| C               | -4.70776 | -0.11512 | 0.33842  | C                | 0.21906  | 1.08773  | -0.06297 |          |
| H               | -5.59702 | -0.75592 | 0.31160  | C                | 1.35078  | 1.90983  | 0.10811  |          |
| H               | -4.58275 | 0.30204  | 1.35008  | C                | 2.63279  | 1.37410  | 0.18333  |          |
| H               | -4.81771 | 0.70211  | -0.39168 | C                | 2.82549  | -0.01472 | 0.05977  |          |
| O               | 1.88759  | 2.23983  | -0.05591 | H                | -0.41220 | -0.94473 | -0.40832 |          |
| C               | 3.29415  | -0.62561 | 0.69017  | H                | 1.20913  | 2.99036  | 0.18587  |          |
| H               | 2.47238  | -1.24418 | 1.09370  | H                | 3.50563  | 2.01331  | 0.33362  |          |
| H               | 3.56964  | 0.10920  | 1.46148  | C                | -1.14132 | 1.73834  | -0.16790 |          |
| O               | 4.45249  | -1.40655 | 0.44434  |                  |          |          |          |          |



|    |          |          |          |                  |          |          |          |
|----|----------|----------|----------|------------------|----------|----------|----------|
| H  | 6.64744  | -3.59609 | 0.88919  | H                | -2.89537 | -2.93746 | 0.04133  |
| H  | 6.35764  | -5.08847 | -0.07679 | C                | -6.29848 | -2.72814 | -0.01874 |
| O  | -0.01274 | -2.76190 | -0.91402 | H                | -7.43148 | -0.88298 | 0.20533  |
| C  | 1.08685  | 0.47275  | -2.15898 | H                | -4.91159 | -4.36886 | -0.21804 |
| H  | 2.17109  | 0.41946  | -2.26331 | O                | -7.33734 | -3.58957 | -0.18155 |
| H  | 0.60759  | 1.31352  | -2.66696 | C                | -8.66252 | -3.06103 | -0.18106 |
| C  | -1.61177 | 1.80878  | 0.00203  | H                | -9.32824 | -3.91928 | -0.33261 |
| C  | -2.78126 | 1.05585  | -0.08789 | H                | -8.89652 | -2.57821 | 0.78144  |
| C  | -2.81546 | -0.24920 | 0.44756  | H                | -8.80040 | -2.33766 | -1.00088 |
| C  | -1.65779 | -0.74964 | 1.07553  | O                | 1.00005  | 3.32654  | 2.27589  |
| C  | -0.50823 | 0.03725  | 1.13114  | H                | 1.82922  | 3.82803  | 2.18038  |
| N  | -0.52575 | 1.28845  | 0.61878  | H                | -0.76089 | -0.56118 | -1.89719 |
| H  | -3.64590 | 1.45503  | -0.61728 |                  |          |          |          |
| H  | -1.65090 | -1.75166 | 1.50145  |                  |          |          |          |
| Rh | 1.16156  | 2.24302  | 0.48360  | <b>1c-C-IM7a</b> |          |          |          |
| C  | -1.35454 | 3.13786  | -0.58438 | C                | 4.60954  | -1.36629 | -1.00221 |
| C  | -2.32350 | 3.92598  | -1.20993 | C                | 3.26463  | -1.06217 | -1.19634 |
| C  | -1.95944 | 5.16410  | -1.74216 | C                | 2.27920  | -2.07349 | -1.23823 |
| C  | -0.63205 | 5.58687  | -1.63977 | C                | 2.72006  | -3.39799 | -1.05469 |
| C  | 0.29272  | 4.75663  | -1.00853 | C                | 4.06261  | -3.72322 | -0.85762 |
| N  | -0.05584 | 3.56778  | -0.49491 | C                | 5.02257  | -2.69758 | -0.83174 |
| H  | -2.70740 | 5.79116  | -2.22996 | H                | 3.00078  | -0.01020 | -1.26471 |
| H  | -3.35245 | 3.57229  | -1.27301 | H                | 1.97012  | -4.19015 | -1.06156 |
| H  | -0.30701 | 6.54711  | -2.04154 | H                | 4.34946  | -4.76630 | -0.72245 |
| H  | 1.34475  | 5.02782  | -0.90695 | C                | 0.79507  | -1.86041 | -1.39019 |
| C  | 3.06221  | 0.29813  | 1.85402  | C                | 0.22997  | -0.64037 | -1.81918 |
| C  | 3.38200  | -0.88028 | 2.52479  | H                | 5.35759  | -0.57242 | -0.95386 |
| C  | 2.37012  | -1.80935 | 2.77711  | O                | 6.35687  | -2.89858 | -0.64036 |
| C  | 1.07319  | -1.54161 | 2.33714  | C                | 6.81762  | -4.23519 | -0.45762 |
| C  | 0.81258  | -0.34773 | 1.66090  | H                | 7.90418  | -4.16410 | -0.32520 |
| N  | 1.81374  | 0.56271  | 1.43887  | H                | 6.36718  | -4.69229 | 0.43846  |
| H  | 2.58810  | -2.73957 | 3.30385  | H                | 6.59441  | -4.85687 | -1.33996 |
| H  | 3.80796  | 1.06491  | 1.63899  | O                | 0.04058  | -2.85289 | -1.10103 |
| H  | 4.41036  | -1.05706 | 2.84116  | C                | 0.86043  | 0.61971  | -2.15521 |
| H  | 0.26645  | -2.25279 | 2.51218  | H                | 1.81555  | 0.58311  | -2.69534 |
| O  | 2.92239  | 3.23395  | 0.23521  | H                | 0.17695  | 1.32912  | -2.63935 |
| H  | 3.57459  | 2.55804  | -0.01325 | C                | -1.60827 | 1.81467  | 0.06924  |
| H  | 1.34274  | 1.41030  | -0.90821 | C                | -2.80280 | 1.10336  | -0.02392 |
| C  | -4.01552 | -1.09608 | 0.30011  | C                | -2.85267 | -0.23692 | 0.42254  |
| C  | -5.30874 | -0.54484 | 0.32034  | C                | -1.68679 | -0.81597 | 0.95530  |
| C  | -3.88914 | -2.48950 | 0.10828  | C                | -0.50661 | -0.07273 | 0.99558  |
| C  | -6.44437 | -1.34327 | 0.16953  | N                | -0.51555 | 1.21985  | 0.59887  |
| H  | -5.43910 | 0.52778  | 0.48000  | H                | -3.67646 | 1.56127  | -0.48647 |
| C  | -5.01004 | -3.29451 | -0.05181 | H                | -1.69565 | -1.84499 | 1.30968  |
|    |          |          |          | Rh               | 1.20873  | 2.11813  | 0.41877  |

|                  |          |          |          |    |          |          |          |
|------------------|----------|----------|----------|----|----------|----------|----------|
| C                | -1.33063 | 3.17445  | -0.43674 | C  | 3.40985  | 0.54314  | 1.80371  |
| C                | -2.30274 | 4.04290  | -0.93665 | C  | 3.85209  | 1.47322  | 0.84134  |
| C                | -1.92082 | 5.30234  | -1.40319 | C  | 2.99581  | 2.54676  | 0.50902  |
| C                | -0.57368 | 5.66698  | -1.36083 | C  | 1.74577  | 2.65387  | 1.11349  |
| C                | 0.35419  | 4.75878  | -0.85298 | N  | 1.36396  | 1.74032  | 2.04609  |
| N                | -0.01154 | 3.54849  | -0.40755 | H  | 4.01199  | -0.33410 | 2.03831  |
| H                | -2.67160 | 5.99139  | -1.79316 | H  | 3.29209  | 3.27633  | -0.24396 |
| H                | -3.34791 | 3.73511  | -0.95349 | Rh | -0.46431 | 1.75121  | 2.67454  |
| H                | -0.23508 | 6.64167  | -1.71325 | C  | 1.49646  | -0.24302 | 3.31451  |
| H                | 1.41959  | 4.98731  | -0.79819 | C  | 2.07533  | -1.41767 | 3.80922  |
| C                | 3.07228  | 0.06742  | 1.70469  | C  | 1.33301  | -2.24871 | 4.64703  |
| C                | 3.38696  | -1.18586 | 2.22674  | C  | 0.02356  | -1.88478 | 4.98574  |
| C                | 2.37785  | -2.14569 | 2.32681  | C  | -0.50239 | -0.70567 | 4.46690  |
| C                | 1.07858  | -1.81518 | 1.93791  | N  | 0.20592  | 0.09378  | 3.64985  |
| C                | 0.82113  | -0.53963 | 1.42971  | H  | 1.77138  | -3.17065 | 5.03244  |
| N                | 1.83253  | 0.37691  | 1.30075  | H  | 3.09659  | -1.67622 | 3.52998  |
| H                | 2.59541  | -3.14230 | 2.71368  | H  | -0.59022 | -2.50873 | 5.63642  |
| H                | 3.82574  | 0.84787  | 1.58911  | H  | -1.52082 | -0.37322 | 4.67668  |
| H                | 4.41253  | -1.40050 | 2.52728  | C  | -1.59803 | 4.11630  | 1.13142  |
| H                | 0.27166  | -2.54176 | 2.01925  | C  | -1.51208 | 5.23448  | 0.30908  |
| O                | 2.98076  | 3.04334  | 0.11711  | C  | -0.28493 | 5.54080  | -0.29024 |
| H                | 3.65884  | 2.34762  | 0.09959  | C  | 0.81482  | 4.71869  | -0.04674 |
| H                | 1.20729  | 1.24904  | -1.18712 | C  | 0.67438  | 3.60881  | 0.79299  |
| C                | -4.07965 | -1.04299 | 0.27486  | N  | -0.53937 | 3.32055  | 1.37180  |
| C                | -5.35703 | -0.47098 | 0.40605  | H  | -0.19164 | 6.40641  | -0.94750 |
| C                | -3.99296 | -2.42133 | -0.02203 | H  | -2.52641 | 3.82159  | 1.62411  |
| C                | -6.51590 | -1.23741 | 0.26651  | H  | -2.39694 | 5.84788  | 0.13625  |
| H                | -5.45455 | 0.58997  | 0.64668  | H  | 1.78211  | 4.93251  | -0.50170 |
| C                | -5.13779 | -3.19315 | -0.17350 | O  | -2.47652 | 1.58383  | 3.11312  |
| H                | -3.01284 | -2.87897 | -0.17614 | H  | -2.38009 | 2.17859  | 3.88517  |
| C                | -6.40988 | -2.60807 | -0.02486 | O  | -0.61848 | 3.07289  | 4.40627  |
| H                | -7.48973 | -0.76436 | 0.39097  | H  | -0.92827 | 3.88768  | 3.97541  |
| H                | -5.07223 | -4.25454 | -0.41981 | H  | -0.63288 | 0.60788  | 1.41530  |
| O                | -7.47409 | -3.43790 | -0.18503 | C  | 5.13175  | 1.25529  | 0.13793  |
| C                | -8.78571 | -2.88921 | -0.06517 | C  | 6.16518  | 0.50284  | 0.72448  |
| H                | -9.47685 | -3.72326 | -0.23661 | C  | 5.32577  | 1.71602  | -1.18252 |
| H                | -8.95112 | -2.47437 | 0.94218  | C  | 7.33713  | 0.19570  | 0.03098  |
| H                | -8.95753 | -2.10584 | -0.82083 | H  | 6.06363  | 0.14802  | 1.75177  |
| O                | 1.22234  | 3.07535  | 2.19246  | C  | 6.48352  | 1.41271  | -1.88923 |
| H                | 2.10407  | 3.48148  | 2.07434  | H  | 4.54039  | 2.28574  | -1.68269 |
| H                | -0.86479 | -0.64154 | -1.79631 | C  | 7.49562  | 0.63840  | -1.29244 |
|                  |          |          |          | H  | 8.11304  | -0.38834 | 0.52525  |
|                  |          |          |          | H  | 6.61716  | 1.75001  | -2.91878 |
| <b>1c-C-TS7a</b> |          |          |          | O  | 8.58081  | 0.36325  | -2.06589 |
| C                | 2.15553  | 0.68704  | 2.38994  |    |          |          |          |

|    |          |          |          |                  |          |          |          |
|----|----------|----------|----------|------------------|----------|----------|----------|
| C  | 9.59569  | -0.48233 | -1.52749 | C                | -0.00502 | -4.29528 | -1.98458 |
| H  | 10.34569 | -0.59411 | -2.31988 | C                | 1.12862  | -4.10190 | -2.77047 |
| H  | 10.06397 | -0.02750 | -0.63971 | C                | 1.26182  | -2.90079 | -3.47629 |
| H  | 9.18600  | -1.47136 | -1.26434 | C                | 0.26626  | -1.93102 | -3.37397 |
| C  | 2.85096  | -3.15683 | 0.30036  | C                | -0.84414 | -2.16976 | -2.55543 |
| C  | 1.69148  | -2.38879 | 0.33275  | N                | -0.96254 | -3.36222 | -1.88155 |
| C  | 1.58626  | -1.18663 | -0.40325 | H                | 2.13893  | -2.71809 | -4.09869 |
| C  | 2.69345  | -0.82630 | -1.19779 | H                | -0.17090 | -5.20713 | -1.40858 |
| C  | 3.85727  | -1.59125 | -1.25610 | H                | 1.89202  | -4.87878 | -2.81635 |
| C  | 3.94712  | -2.76424 | -0.49057 | H                | 0.35503  | -0.98555 | -3.90726 |
| H  | 0.87155  | -2.74608 | 0.94852  | O                | -2.20634 | -5.23163 | 0.12593  |
| H  | 2.62981  | 0.09687  | -1.77384 | H                | -3.04597 | -5.63040 | 0.40875  |
| H  | 4.68788  | -1.25943 | -1.87926 | H                | -1.37510 | -2.52577 | 0.43969  |
| C  | 0.41895  | -0.25884 | -0.41714 | C                | -2.87232 | 2.44733  | -2.48187 |
| C  | -0.77697 | -0.41520 | 0.38388  | C                | -3.97972 | 3.29560  | -2.29598 |
| H  | 2.92443  | -4.07844 | 0.88100  | C                | -1.65147 | 3.04050  | -2.87860 |
| O  | 5.04185  | -3.57515 | -0.45722 | C                | -3.88657 | 4.67589  | -2.48386 |
| C  | 6.17068  | -3.21175 | -1.25080 | H                | -4.94633 | 2.87899  | -2.00679 |
| H  | 6.92934  | -3.98225 | -1.06691 | C                | -1.54693 | 4.40879  | -3.08005 |
| H  | 5.91360  | -3.19665 | -2.32249 | H                | -0.75642 | 2.42803  | -2.98989 |
| H  | 6.56409  | -2.22715 | -0.95293 | C                | -2.66059 | 5.24208  | -2.86978 |
| O  | 0.51250  | 0.78837  | -1.12985 | H                | -4.76707 | 5.29763  | -2.32417 |
| C  | -1.25020 | -1.61085 | 1.12589  | H                | -0.59612 | 4.86113  | -3.36573 |
| H  | -0.56781 | -1.99306 | 1.89544  | O                | -2.45049 | 6.57397  | -3.03423 |
| H  | -2.22384 | -1.42253 | 1.59478  | C                | -3.52976 | 7.46899  | -2.76693 |
| C  | -3.89850 | -0.89614 | -1.03118 | H                | -3.13297 | 8.47686  | -2.93780 |
| C  | -3.93918 | 0.45539  | -1.36678 | H                | -4.37513 | 7.28459  | -3.44887 |
| C  | -2.94780 | 0.99613  | -2.22164 | H                | -3.86849 | 7.37707  | -1.72244 |
| C  | -1.96684 | 0.12770  | -2.73675 | O                | -3.68341 | -4.45187 | -2.08682 |
| C  | -1.91948 | -1.20017 | -2.30699 | H                | -3.40947 | -5.35115 | -1.81995 |
| N  | -2.90312 | -1.67660 | -1.50498 | H                | -1.58739 | 0.17594  | -0.05330 |
| H  | -4.69371 | 1.09867  | -0.91714 |                  |          |          |          |
| H  | -1.20308 | 0.49869  | -3.41555 |                  |          |          |          |
| Rh | -2.63985 | -3.44553 | -0.71578 | <b>1c-C-TS4b</b> |          |          |          |
| C  | -4.77914 | -1.60849 | -0.08362 | C                | -0.06588 | -0.39821 | -1.08072 |
| C  | -5.93676 | -1.06342 | 0.47473  | C                | -1.45321 | -0.52034 | -1.11892 |
| C  | -6.68399 | -1.82028 | 1.37914  | C                | -2.26281 | 0.54481  | -0.66620 |
| C  | -6.25531 | -3.10790 | 1.70760  | C                | -1.63023 | 1.70693  | -0.17490 |
| C  | -5.09090 | -3.59954 | 1.12023  | C                | -0.23832 | 1.77841  | -0.15309 |
| N  | -4.37212 | -2.87520 | 0.24956  | N                | 0.48667  | 0.73048  | -0.59077 |
| H  | -7.59122 | -1.40559 | 1.82115  | H                | -1.90485 | -1.43530 | -1.49729 |
| H  | -6.24725 | -0.05576 | 0.19980  | H                | -2.22046 | 2.56264  | 0.14863  |
| H  | -6.80761 | -3.73213 | 2.41058  | Rh               | 2.43369  | 0.93468  | -0.72533 |
| H  | -4.70974 | -4.59537 | 1.34997  | C                | 0.93583  | -1.36926 | -1.56838 |
|    |          |          |          | C                | 0.63019  | -2.62743 | -2.09127 |

|   |          |          |          |                  |          |          |          |
|---|----------|----------|----------|------------------|----------|----------|----------|
| C | 1.66491  | -3.44498 | -2.54987 | H                | -0.12323 | -4.14009 | 0.68475  |
| C | 2.98322  | -2.98867 | -2.48249 | H                | 1.29019  | -0.52399 | 2.57403  |
| C | 3.22966  | -1.72755 | -1.94407 | H                | -1.05124 | 0.23754  | 2.85222  |
| N | 2.23566  | -0.94830 | -1.49920 | C                | 2.12736  | -2.94060 | 1.45860  |
| H | 1.43934  | -4.43182 | -2.95707 | C                | 3.26842  | -2.43418 | 2.31471  |
| H | -0.40549 | -2.96247 | -2.13381 | H                | 2.94723  | -1.67060 | 3.03544  |
| H | 3.81667  | -3.59763 | -2.83348 | H                | -2.46466 | -3.39878 | 0.98814  |
| H | 4.23127  | -1.30350 | -1.85994 | O                | -3.14669 | -1.04547 | 2.19255  |
| C | 2.79587  | 3.74688  | 0.40089  | C                | -4.27476 | -1.83863 | 1.81798  |
| C | 2.35482  | 4.93863  | 0.97488  | H                | -5.15805 | -1.25850 | 2.10787  |
| C | 0.98773  | 5.11088  | 1.20026  | H                | -4.29030 | -2.01718 | 0.73219  |
| C | 0.10067  | 4.09326  | 0.84236  | H                | -4.26858 | -2.79987 | 2.35570  |
| C | 0.59928  | 2.92269  | 0.26696  | O                | 2.34382  | -3.85288 | 0.65112  |
| N | 1.94394  | 2.77189  | 0.05830  | C                | 4.47218  | -1.90723 | 1.49764  |
| H | 0.61040  | 6.02924  | 1.65273  | H                | 4.68868  | -2.67553 | 0.71855  |
| H | 3.85092  | 3.54599  | 0.20620  | H                | 5.35041  | -1.92498 | 2.18727  |
| H | 3.07846  | 5.71007  | 1.23950  | O                | 4.25914  | -0.65358 | 0.95627  |
| H | -0.97021 | 4.20263  | 1.01311  | O                | 2.89118  | 0.98343  | 2.30958  |
| O | 4.42195  | 1.13417  | -0.96851 | H                | 3.37913  | 1.81808  | 2.23246  |
| H | 4.65679  | 0.40690  | -0.33248 | H                | 3.59799  | -3.31632 | 2.89189  |
| O | 2.14705  | 1.64579  | -2.52613 |                  |          |          |          |
| H | 3.06907  | 1.67038  | -2.84516 |                  |          |          |          |
| C | -3.73388 | 0.44364  | -0.71231 | <b>1c-C-IM5b</b> |          |          |          |
| C | -4.54274 | 1.18355  | 0.17008  | C                | 0.19359  | -0.47388 | -1.03787 |
| C | -4.37657 | -0.42095 | -1.62557 | C                | -1.19570 | -0.49290 | -1.14096 |
| C | -5.93289 | 1.06889  | 0.16052  | C                | -1.94373 | 0.63514  | -0.74085 |
| H | -4.08487 | 1.83960  | 0.91226  | C                | -1.24815 | 1.76035  | -0.24829 |
| C | -5.75980 | -0.54085 | -1.65211 | C                | 0.14288  | 1.73241  | -0.16766 |
| H | -3.78726 | -0.99616 | -2.34176 | N                | 0.81048  | 0.62497  | -0.55427 |
| C | -6.55182 | 0.20030  | -0.75502 | H                | -1.69759 | -1.38283 | -1.51554 |
| H | -6.52114 | 1.64643  | 0.87313  | H                | -1.78823 | 2.66091  | 0.03978  |
| H | -6.25274 | -1.20264 | -2.36642 | Rh               | 2.75396  | 0.66655  | -0.54851 |
| O | -7.89353 | 0.01536  | -0.84616 | C                | 1.13942  | -1.53653 | -1.42758 |
| C | -8.74349 | 0.74860  | 0.03528  | C                | 0.76423  | -2.77854 | -1.94333 |
| H | -8.62871 | 1.83378  | -0.11689 | C                | 1.75228  | -3.70054 | -2.29290 |
| H | -9.76752 | 0.44834  | -0.21718 | C                | 3.09615  | -3.36000 | -2.12484 |
| H | -8.53371 | 0.49704  | 1.08729  | C                | 3.41223  | -2.10717 | -1.60240 |
| H | 3.48493  | 0.30350  | 1.78751  | N                | 2.46342  | -1.22375 | -1.26050 |
| C | -1.64794 | -2.76955 | 1.34066  | H                | 1.47171  | -4.67602 | -2.69309 |
| C | -0.33058 | -3.18498 | 1.17070  | H                | -0.29120 | -3.02033 | -2.06403 |
| C | 0.75194  | -2.41339 | 1.63489  | H                | 3.89731  | -4.05064 | -2.38921 |
| C | 0.47634  | -1.17135 | 2.24578  | H                | 4.44195  | -1.77980 | -1.44876 |
| C | -0.83240 | -0.72991 | 2.39700  | C                | 3.29063  | 3.46450  | 0.49990  |
| C | -1.90478 | -1.53449 | 1.96780  | C                | 2.92174  | 4.70897  | 1.00924  |
|   |          |          |          | C                | 1.56325  | 5.00470  | 1.14373  |







|   |          |          |          |   |          |          |          |
|---|----------|----------|----------|---|----------|----------|----------|
| C | 1.55853  | 1.95280  | -1.64306 | C | 2.26735  | 4.01404  | -0.66004 |
| C | 0.20570  | 1.58540  | -1.80431 | C | 1.35310  | 3.04643  | -0.23897 |
| C | -0.81186 | 2.52009  | -1.65751 | N | 0.02656  | 3.36334  | -0.09995 |
| C | -0.50244 | 3.85576  | -1.33994 | H | 2.52429  | 6.07192  | -1.26260 |
| H | 2.89351  | 3.59010  | -1.24221 | H | -1.47729 | 4.76685  | -0.23411 |
| H | -0.06412 | 0.55346  | -2.03162 | H | 0.07247  | 6.60442  | -0.99797 |
| H | -1.85961 | 2.23311  | -1.76319 | H | 3.32093  | 3.75757  | -0.76816 |
| C | 2.68553  | 0.97089  | -1.68453 | O | -2.80795 | 2.83060  | 0.78652  |
| C | 2.39294  | -0.45422 | -1.67168 | H | -3.55000 | 2.24259  | 0.49638  |
| H | 1.10347  | 5.28109  | -0.97442 | C | 4.41147  | -0.99899 | 0.15250  |
| O | -1.56033 | 4.69180  | -1.17480 | C | 5.40506  | -0.50286 | -0.71255 |
| C | -1.30423 | 6.04761  | -0.81069 | C | 4.71307  | -2.15812 | 0.90233  |
| H | -2.28780 | 6.52149  | -0.70729 | C | 6.64741  | -1.12550 | -0.83799 |
| H | -0.76462 | 6.10312  | 0.14843  | H | 5.20456  | 0.37679  | -1.32696 |
| H | -0.72558 | 6.56595  | -1.59193 | C | 5.94743  | -2.78467 | 0.79381  |
| O | 3.86486  | 1.39559  | -1.61788 | H | 3.98057  | -2.56492 | 1.60188  |
| H | 3.21542  | -1.05155 | -2.08667 | C | 6.92712  | -2.27488 | -0.07940 |
| H | 1.42195  | -0.75541 | -2.08229 | H | 7.38302  | -0.71548 | -1.52959 |

**1c-C-TS6b**

|    |          |          |          |   |          |          |          |
|----|----------|----------|----------|---|----------|----------|----------|
| O  | -0.76018 | 2.33456  | 2.41885  | O | 8.10262  | -2.95192 | -0.12403 |
| H  | -1.60093 | 2.81807  | 2.55612  | C | 9.13262  | -2.46997 | -0.98677 |
| C  | 0.72830  | -0.39690 | 0.78389  | H | 9.43908  | -1.44990 | -0.70484 |
| C  | 1.95569  | -1.05053 | 0.68132  | H | 9.97753  | -3.15699 | -0.85767 |
| C  | 3.09878  | -0.33257 | 0.26872  | H | 8.80507  | -2.48163 | -2.03863 |
| C  | 2.95477  | 1.04033  | -0.03296 | O | -0.46942 | 1.13211  | -2.29210 |
| C  | 1.70291  | 1.64326  | 0.06867  | H | -0.19925 | 2.05872  | -2.40205 |
| N  | 0.64381  | 0.91094  | 0.47090  | H | -1.43448 | 1.21227  | -2.07838 |
| H  | 2.02050  | -2.11484 | 0.90252  | C | -5.02229 | -3.02211 | -0.59275 |
| H  | 3.81867  | 1.63119  | -0.33336 | C | -5.06717 | -1.62568 | -0.65349 |
| Rh | -1.10365 | 1.79427  | 0.57031  | C | -4.00771 | -0.87151 | -1.17992 |
| C  | -0.56344 | -0.97037 | 1.21239  | C | -2.87103 | -1.56732 | -1.63991 |
| C  | -0.74545 | -2.30273 | 1.58236  | C | -2.79728 | -2.95493 | -1.56577 |
| C  | -2.00900 | -2.73116 | 2.00007  | C | -3.87379 | -3.69345 | -1.04099 |
| C  | -3.05757 | -1.81407 | 2.04755  | H | -5.94515 | -1.10060 | -0.27064 |
| C  | -2.82227 | -0.49676 | 1.64994  | H | -2.01488 | -1.01232 | -2.02722 |
| N  | -1.61412 | -0.08942 | 1.24087  | H | -1.90415 | -3.48993 | -1.89531 |
| H  | -2.16597 | -3.77260 | 2.28510  | C | -4.08119 | 0.63096  | -1.15161 |
| H  | 0.09321  | -2.99735 | 1.54371  | C | -3.40497 | 1.35654  | -2.12461 |
| H  | -4.05755 | -2.10649 | 2.36700  | H | -5.86980 | -3.57162 | -0.18258 |
| H  | -3.61583 | 0.25109  | 1.61326  | O | -3.71023 | -5.04838 | -1.00032 |
| C  | -0.40712 | 4.60185  | -0.36971 | C | -4.76806 | -5.83572 | -0.46190 |
| C  | 0.46189  | 5.60711  | -0.79169 | H | -4.43111 | -6.87786 | -0.52364 |
| C  | 1.81764  | 5.30727  | -0.93643 | H | -4.96296 | -5.57390 | 0.59116  |
|    |          |          |          | H | -5.69385 | -5.71416 | -1.04797 |

|   |          |         |          |
|---|----------|---------|----------|
| O | -4.76101 | 1.15704 | -0.18295 |
| H | -3.49619 | 2.44693 | -2.14292 |
| H | -3.03873 | 0.86431 | -3.02831 |
